# Supplementary material for: Visible-light-promoted organic-dye-catalyzed sulfonylation/cyclization to access indolo[2,1-a]isoquinoline derivatives
Source: Royal Society of Chemistry journal article supplement (doi:10.1039/d3ob01289a), 2023-01-01

## Supporting Information

# Visible-Light-Promoted Organic-Dye-Catalyzed Sulfonylation/Cyclization to Access Indolo[2,1- $\alpha$ ]isoquinoline Derivatives

Yucai Tang<sup>a\*</sup>, Jinglin Duan<sup>a</sup>, Biyu Yang<sup>a</sup>, Yupeng He<sup>a</sup>, Changyuan Du<sup>a</sup> and Xiangyang  
Zhang

*<sup>a</sup>College of Chemistry and Materials Engineering, Hunan University of Arts and  
Science, Engineering Technology Research Center of Key Preparation Technology  
of Biomedical Polymer Materials, Changde 415000, P.R. China. \*e-mail:  
yctang1009@163.com*

### Contents

|                                                                    |        |
|--------------------------------------------------------------------|--------|
| 1. General Information.....                                        | S2     |
| 2. Experimental Sections.....                                      | S2     |
| 3. Fluorescence quenching experiments.....                         | S3     |
| 4. <sup>1</sup> H and <sup>13</sup> C NMR Spectra of Products..... | S4-S53 |

## 1. General Information

All reagents and solvents were purchased from commercial suppliers and used without purifications. TLC was performed on silica gel plates (200-300mesh) using UV light (254/365 nm) for detection and column chromatography was performed on silicagel (200-300 mesh).The  $^1\text{H}$  NMR and  $^{13}\text{C}$  NMR spectra were recorded at 25 °C in  $\text{CDCl}_3$  at 400 and 100 MHz, respectively, with TMS as the internal standard. Chemical shifts ( $\delta$ ) are expressed in ppm and coupling constants  $J$  are given in Hz. All reactions were performed on the photoreaction instrument (WP-TEC-1020SL), which are purchased from WATTCAS, China (Figure S1).

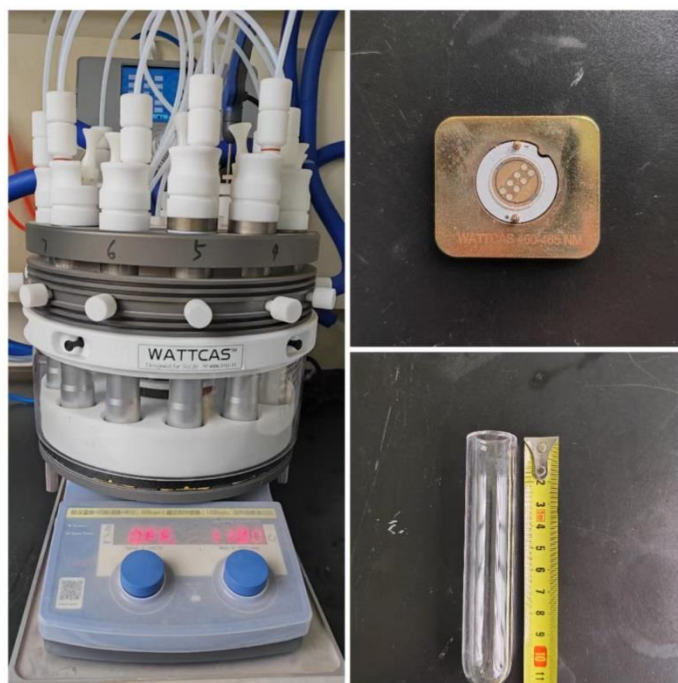

Figure S1. Photoreactor for photoreaction

## 2. Experimental Section

**General procedures for the synthesis of ester substituted indolo[2,1- $\alpha$ ]isoquinolines and benzimidazo[2,1- $\alpha$ ]isoquinolin-6(5*H*)-ones.**

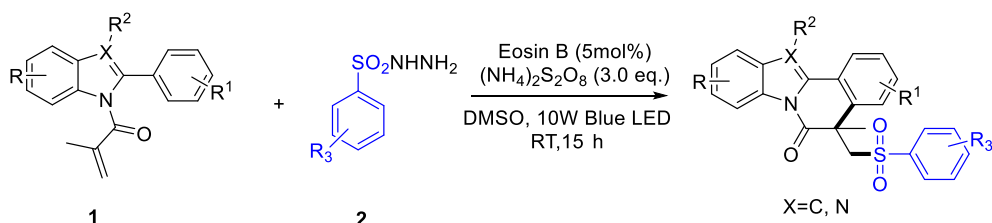

To a suspension of 2-aryl-*N*-acryloyl indoles (0.2mmol) in DMSO (2mL) was added sulfonyl hydrazine(0.6 mmol,3.0 eq.), Eosin B (5mol%) and (NH<sub>4</sub>)<sub>2</sub>S<sub>2</sub>O<sub>8</sub> (0.6 mmol, 3.0 eq.) at room temperature, and the mixture was stirred in air under a 10W blue LEDs and irradiated for 15 hours. The temperature was maintained at 20~25 °C when the LED light was on. After the reaction was complete, the reaction mixture was diluted with a brine solution (25 mL) and extracted with EtOAc (3 × 50 mL). The combined organic phase was dried over anhydrous Na<sub>2</sub>SO<sub>4</sub>, filtered and concentrated in vacuo. The residue was purified by flashcolumn chromatography to afford the desired products.

### 3.Fluorescence quenching experiments

The fluorescence emission intensities were carried out on an F-7000 FL spectrophotometer (Hitachi Ltd, Japan) with excitation slit set at 5 nm and emission at 5 nm. The excitation wavelength was fixed at 323 nm, and the emission wavelength was measured at 350~550 nm. The samples were prepared by mixing Eosin B (1.0×10<sup>-8</sup>mol/L) and different amount of (NH<sub>4</sub>)<sub>2</sub>S<sub>2</sub>O<sub>8</sub> in DMSO in a light path quartz fluorescence cuvette. The concentration of (NH<sub>4</sub>)<sub>2</sub>S<sub>2</sub>O<sub>8</sub> stock solution is 1.3×10<sup>-6</sup>mol/L in DMSO. For each quenching experiment, 0.1mL of (NH<sub>4</sub>)<sub>2</sub>S<sub>2</sub>O<sub>8</sub> stock solution was titrated to a mixed solution of Eosin B (0.1mL, in a total volume = 1.0 mL). Then the emission intensity was collected and the results were presented in Figure S1.

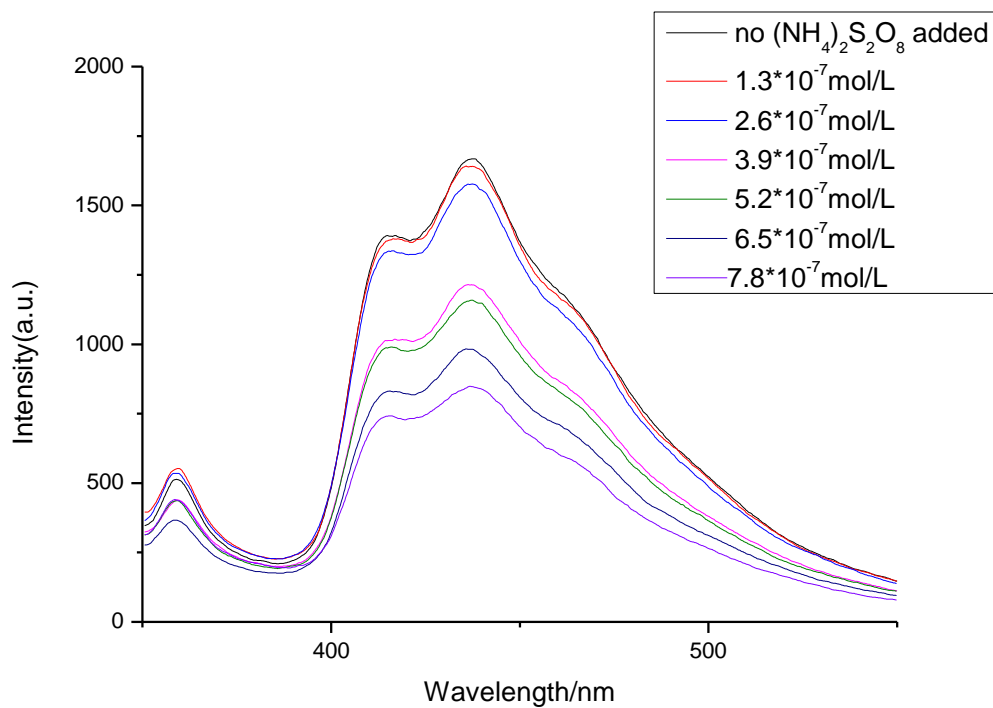

**Figure S1** Quenching of Eosin B fluorescence emission in the presence of  $(\text{NH}_4)_2\text{S}_2\text{O}_8$ .

### 4.<sup>1</sup>H and <sup>13</sup>C NMR spectra of products

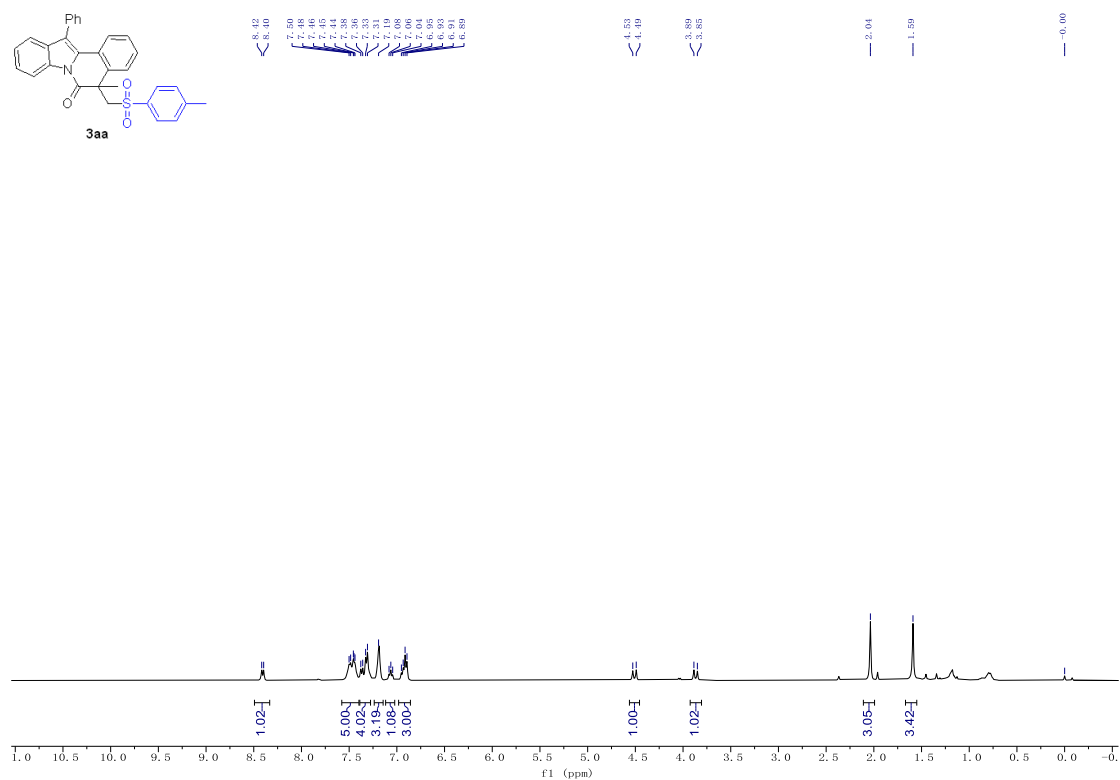

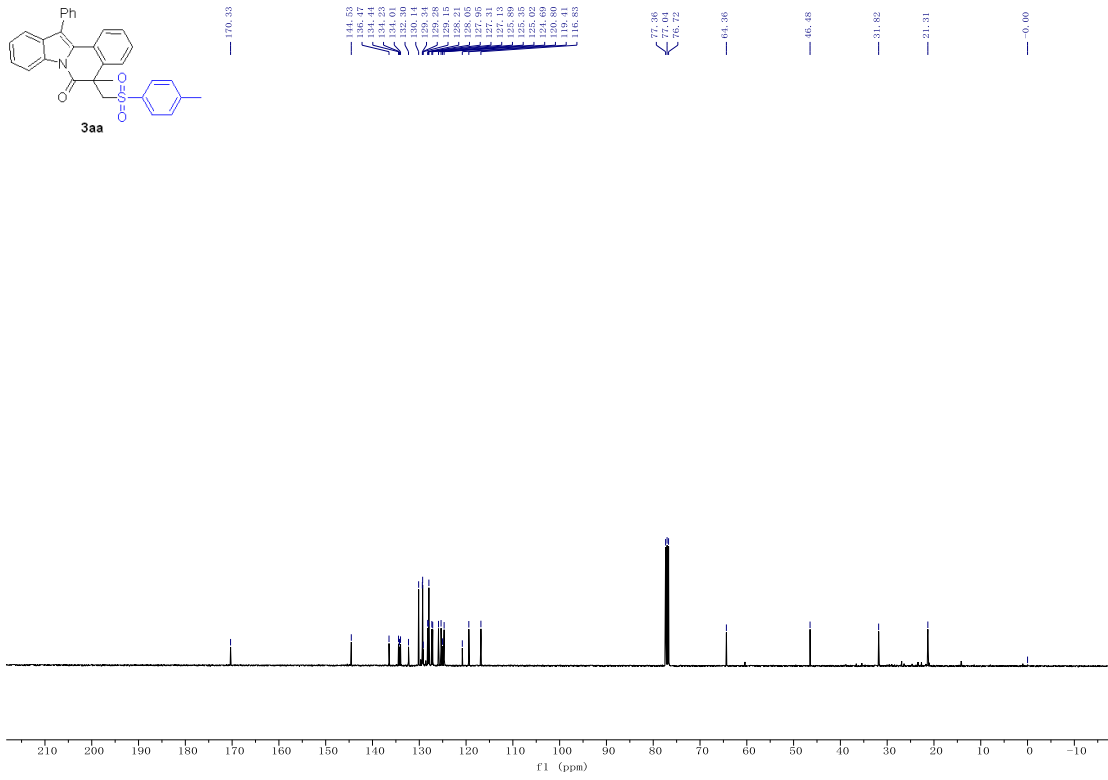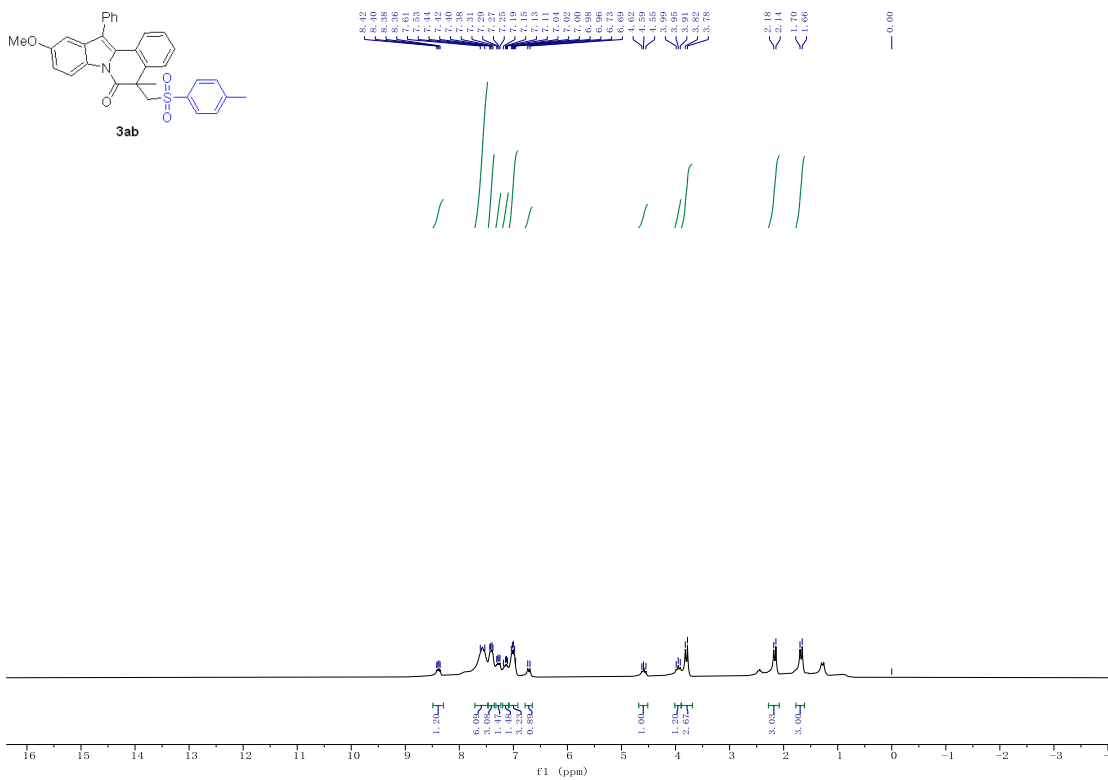

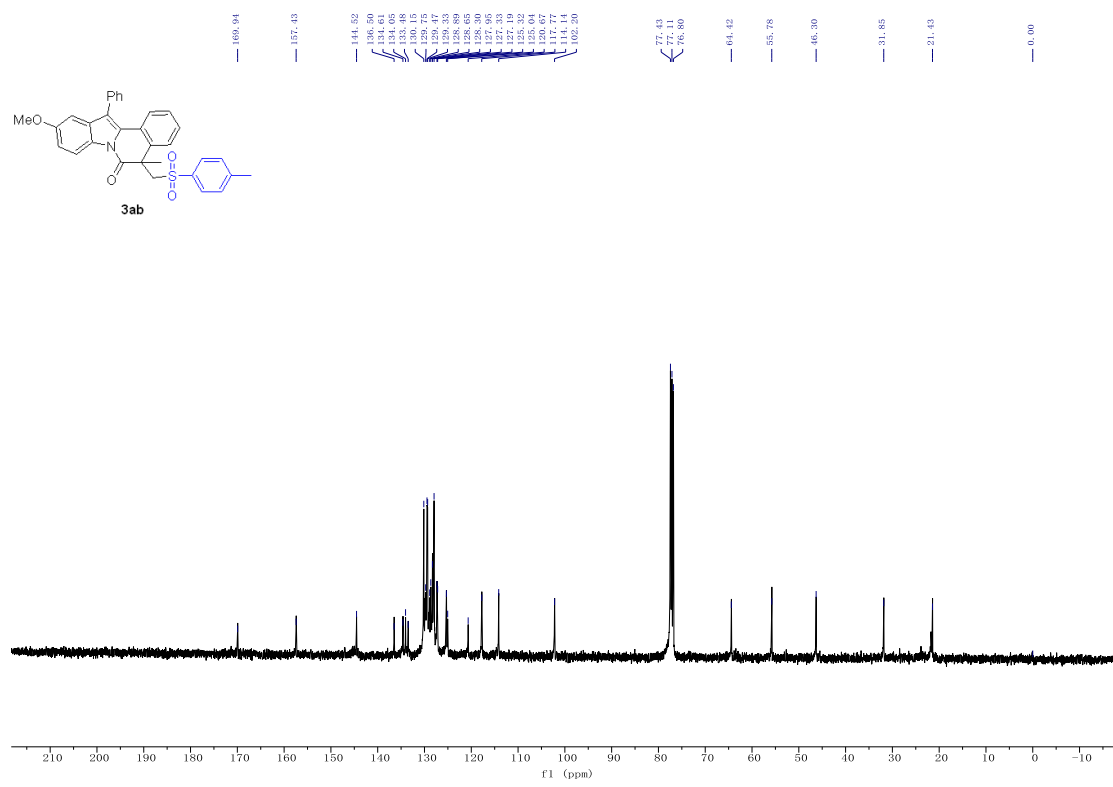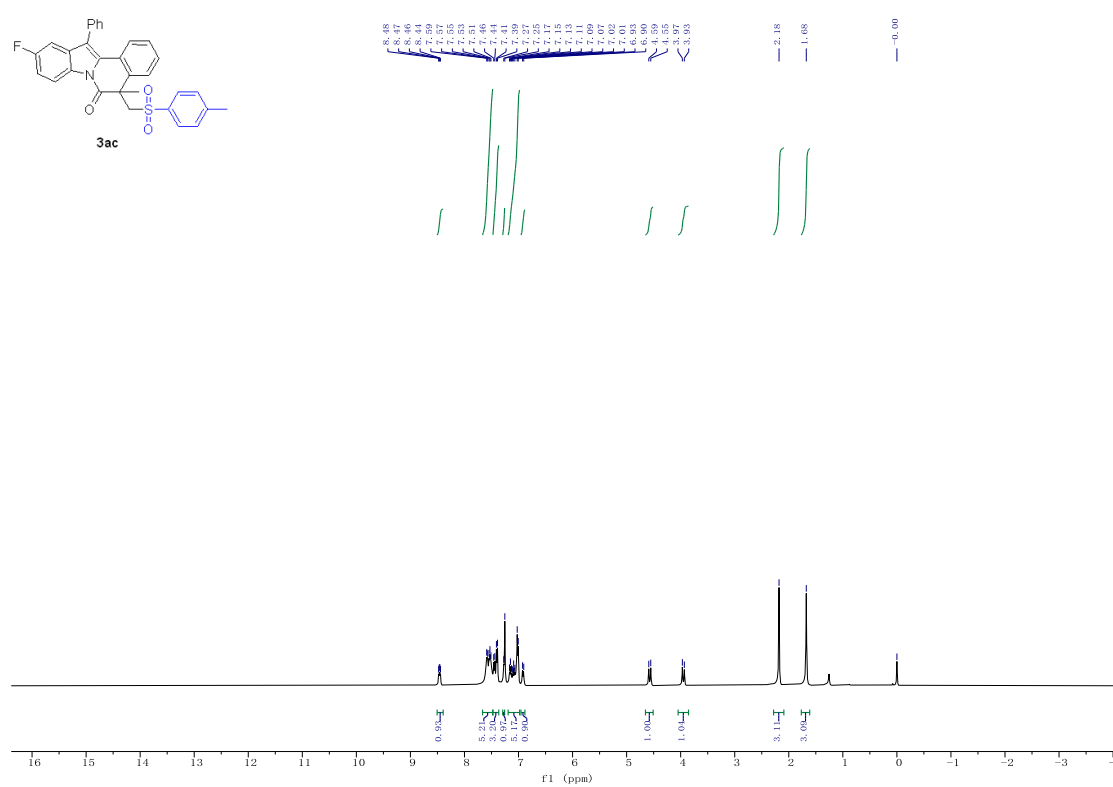

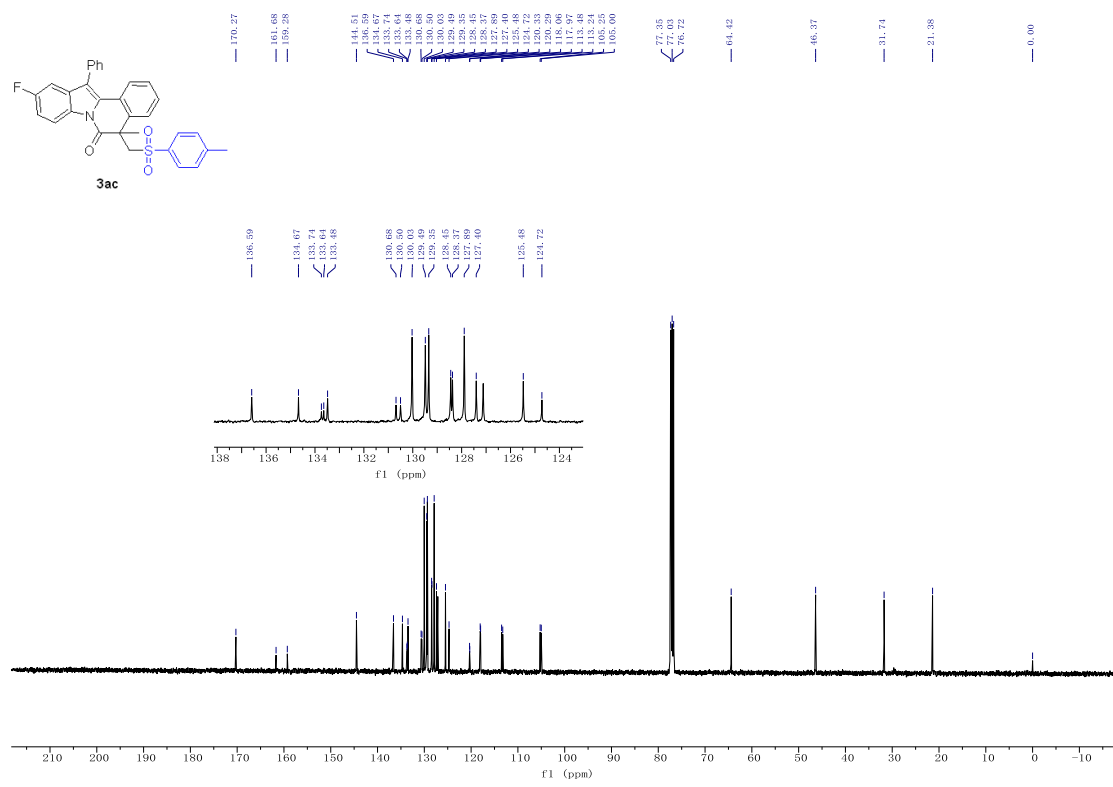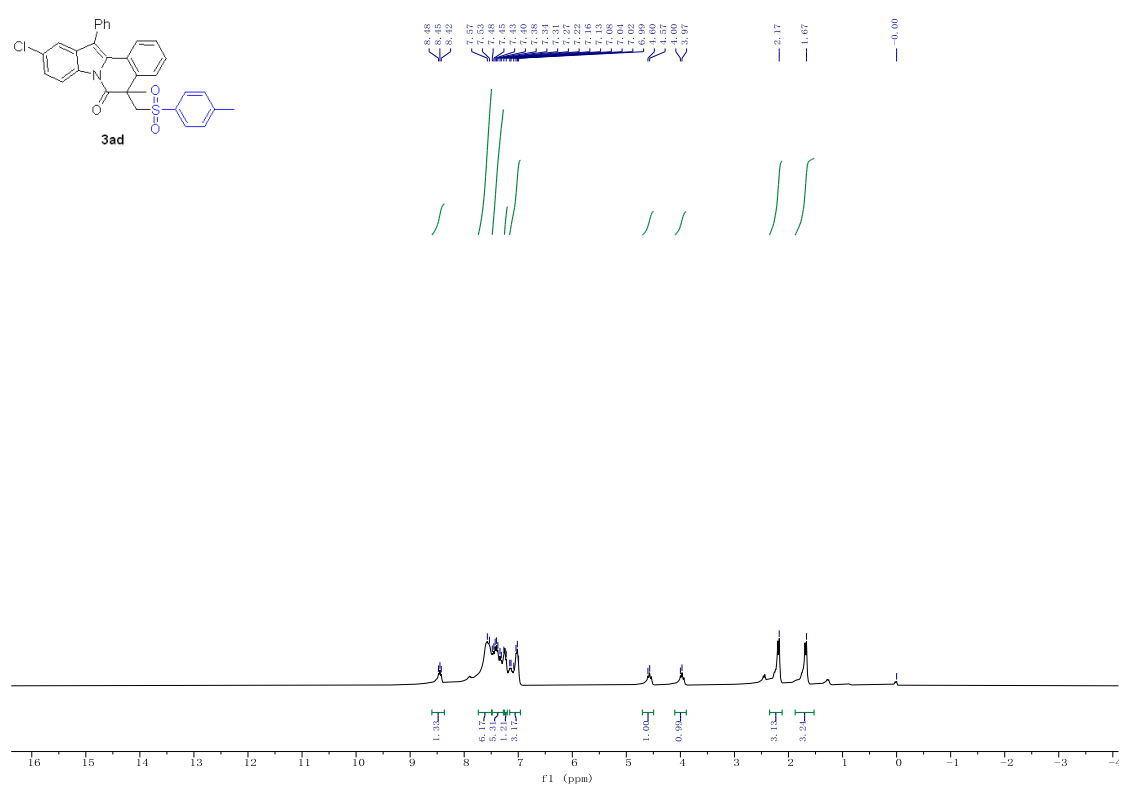

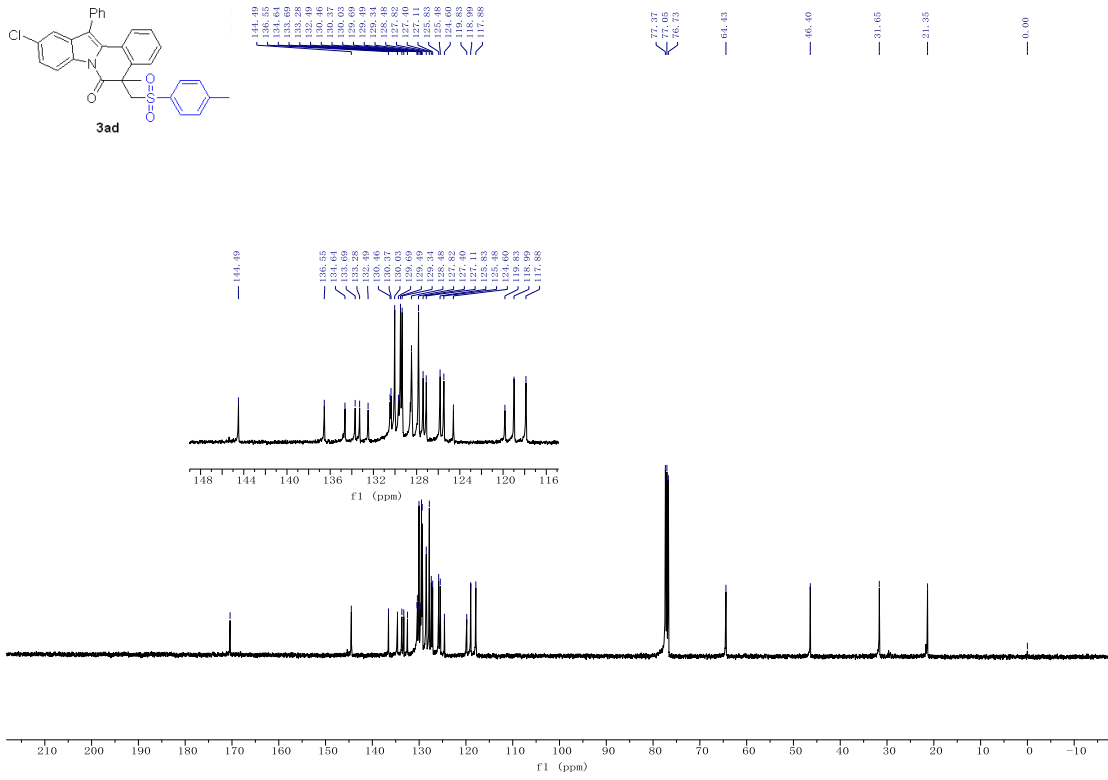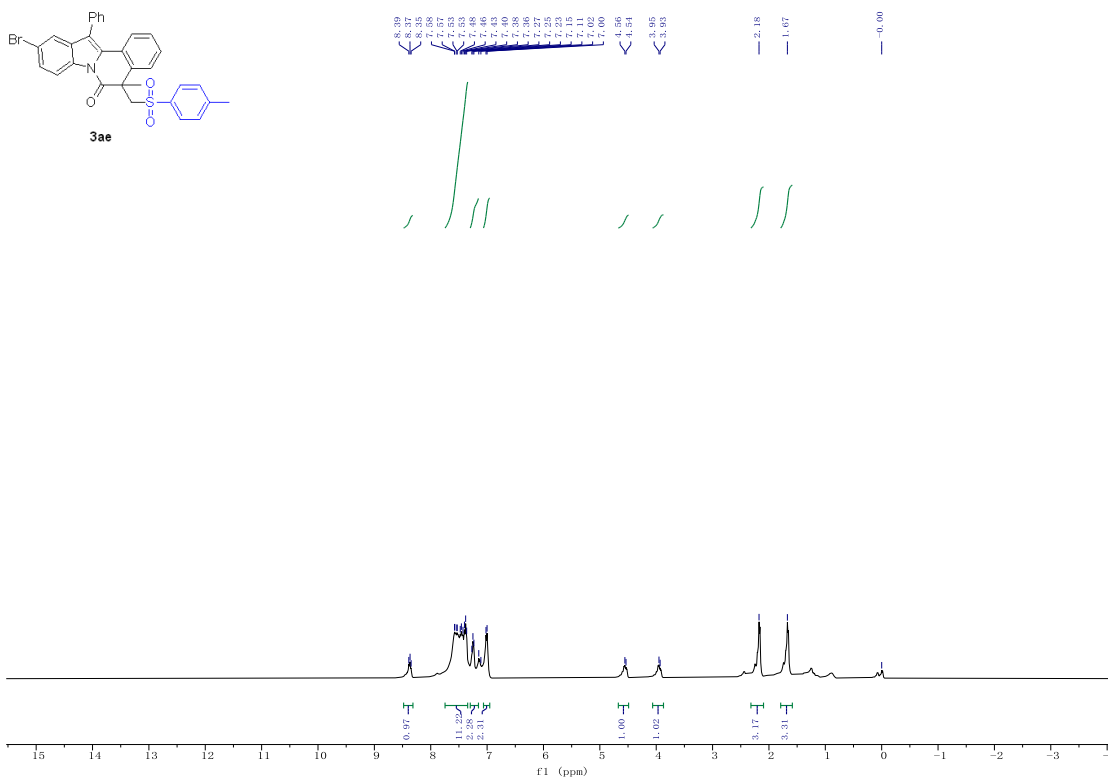



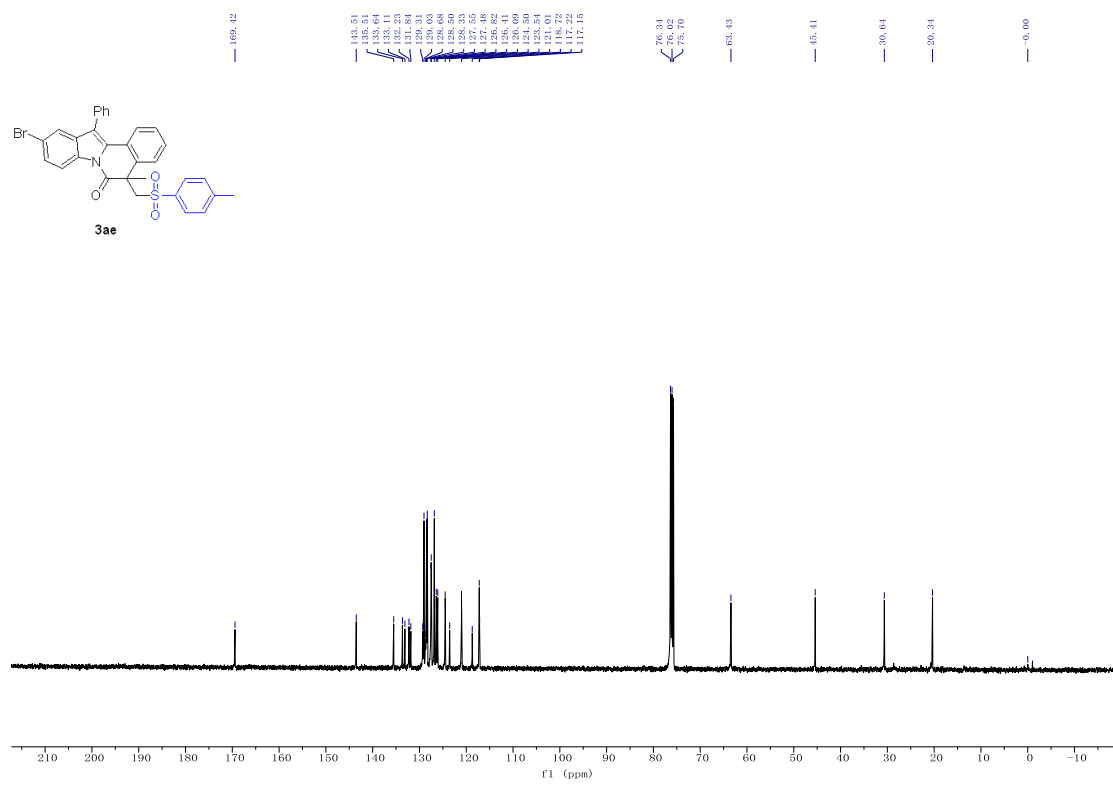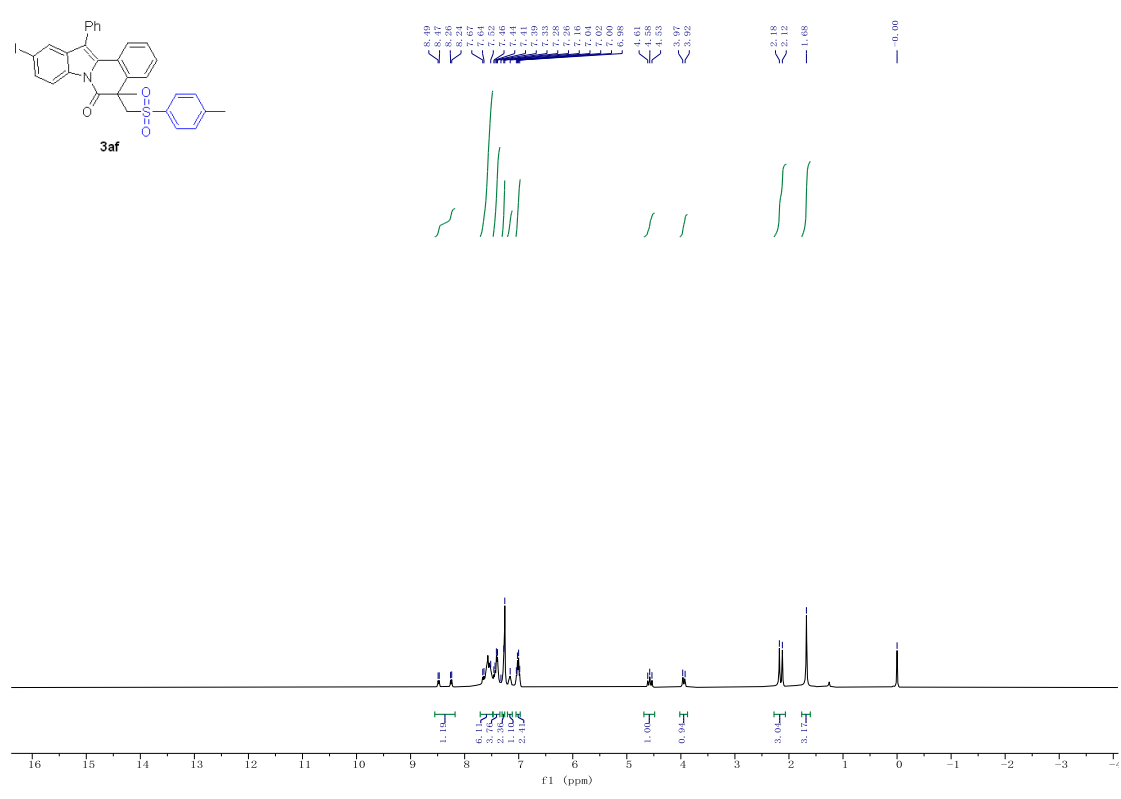

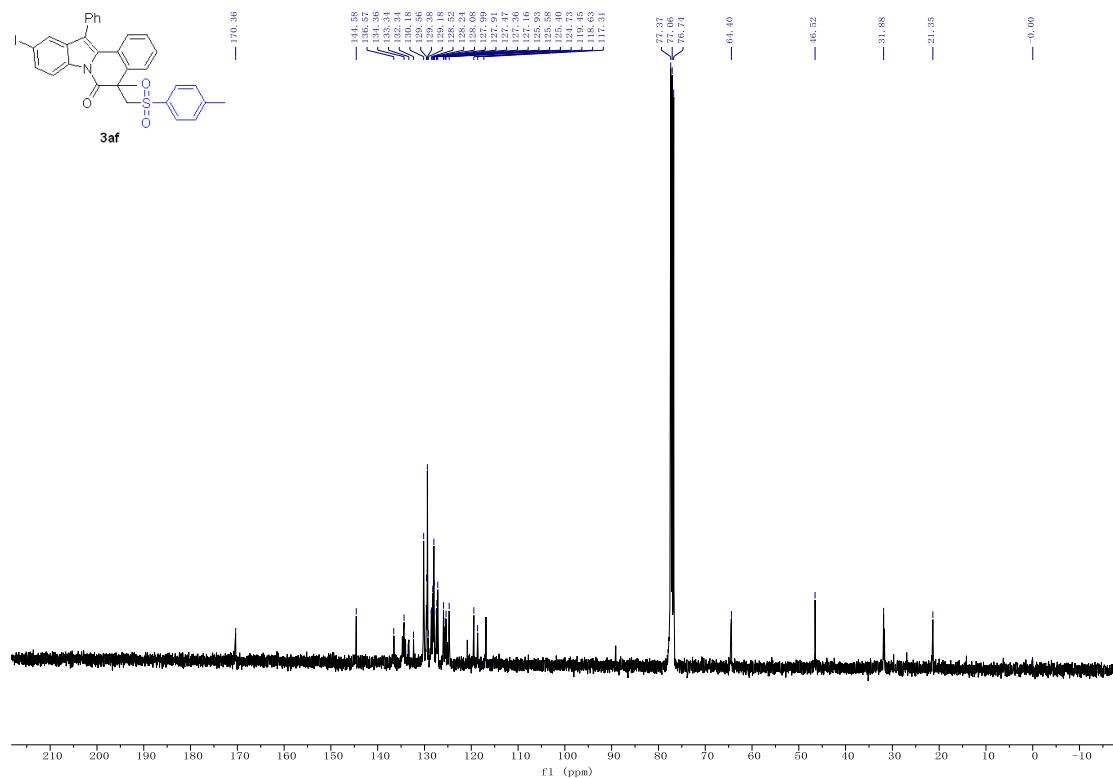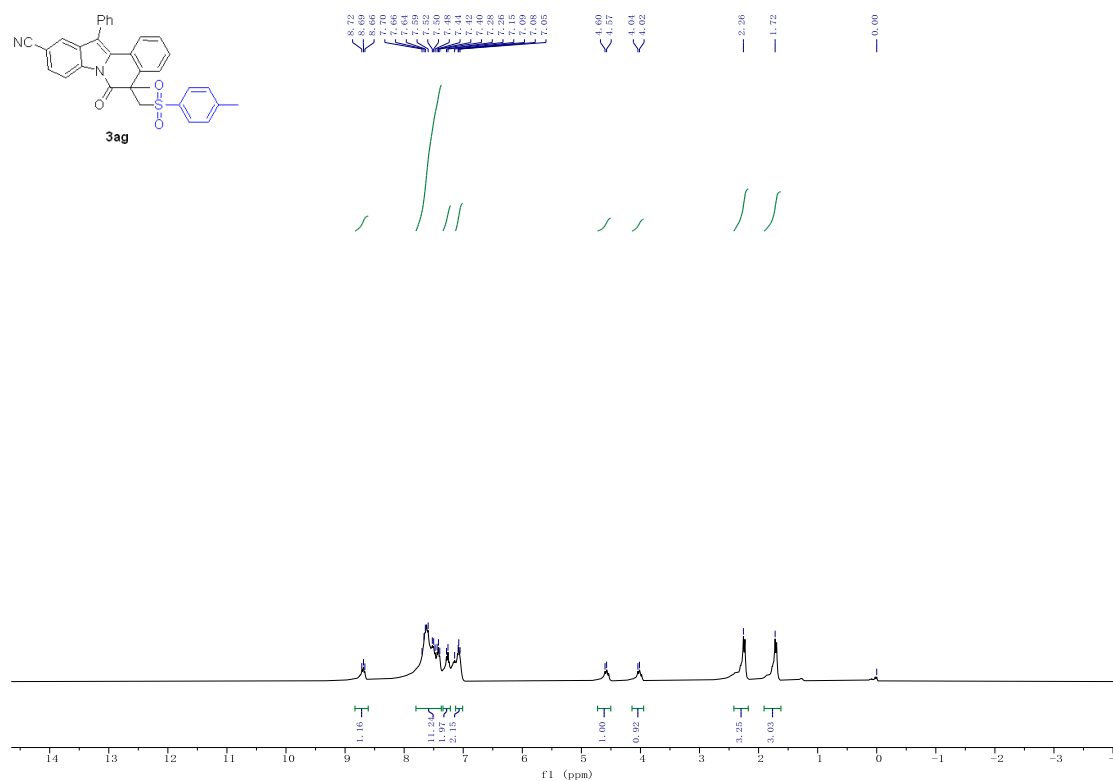

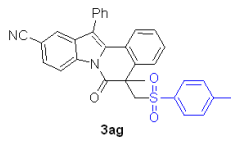

134.54  
134.02  
134.65  
132.55  
131.35  
129.64  
129.46  
128.79  
127.73  
127.07  
125.73  
124.96  
119.76  
112.89  
112.80  
108.00

77.37  
77.05  
76.73

64.02

46.69

31.45

21.41

0.00

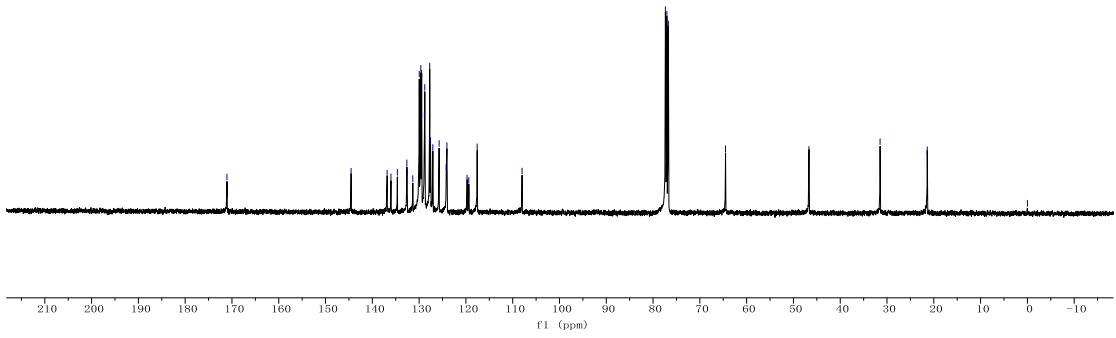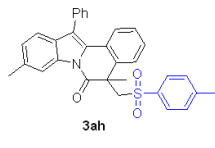

8.34  
8.31  
8.28  
7.53  
7.41  
7.40  
7.38  
7.25  
7.20  
7.16  
7.14  
7.11  
7.08  
7.00  
6.99  
6.96  
4.39  
4.26  
3.95  
3.92

2.52

2.15

1.67

0.00

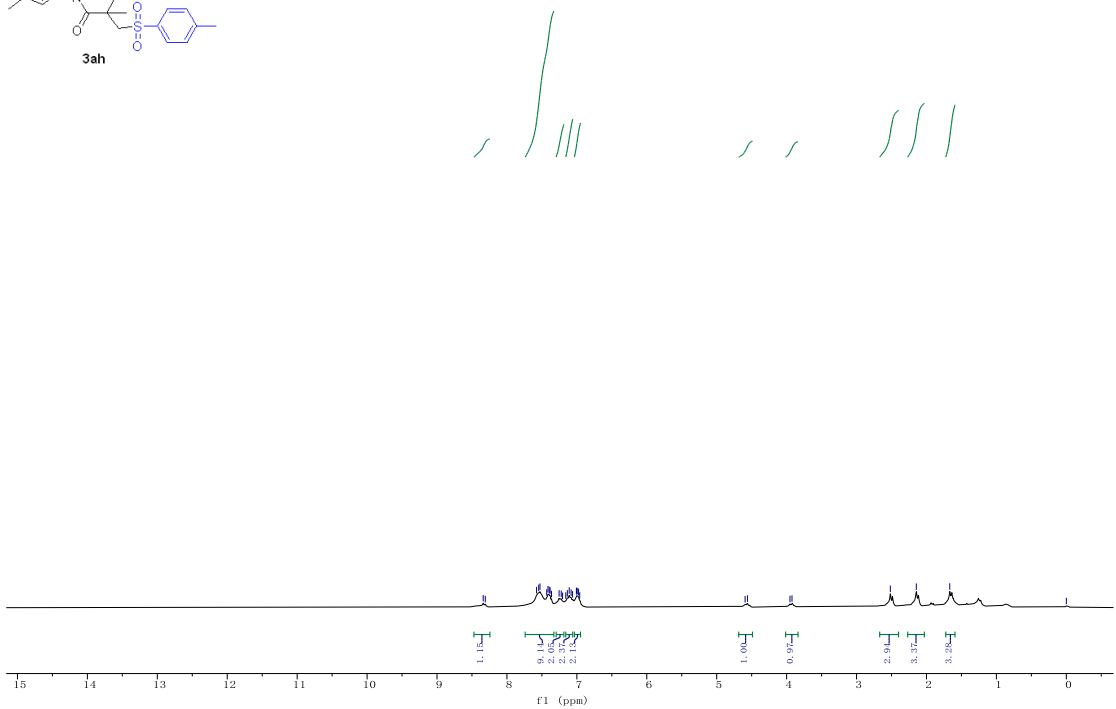

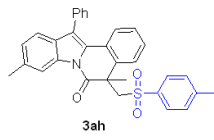

144.44  
138.29  
136.29  
134.63  
133.15  
129.32  
128.19  
127.97  
127.93  
127.80  
127.29  
126.68  
126.68  
119.09  
117.09

77.38  
76.74

61.43

46.51

31.83

21.99  
21.31

0.00

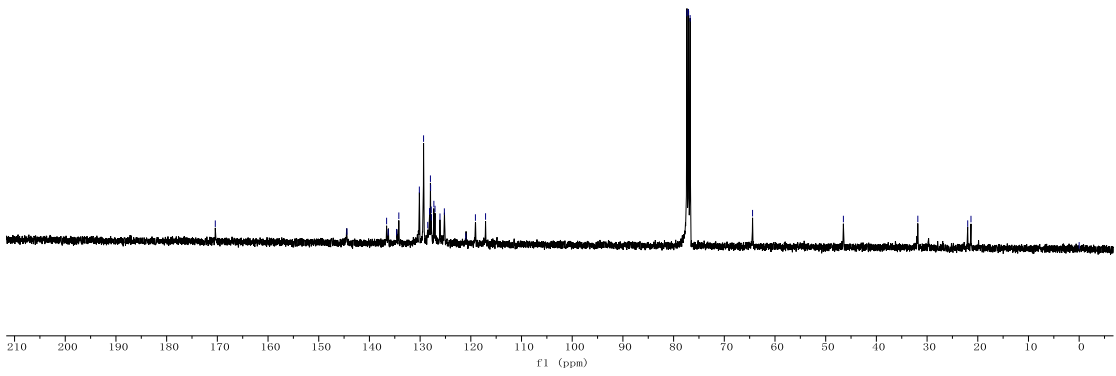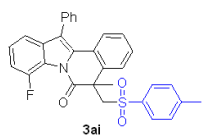

7.92  
7.87  
7.56  
7.56  
7.55  
7.48  
7.47  
7.38  
7.36  
7.31  
7.23  
7.23  
7.20  
7.18  
7.08  
7.02  
7.00

4.58  
4.56

3.94  
3.91

2.21

1.73

0.00

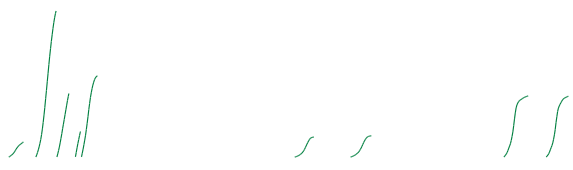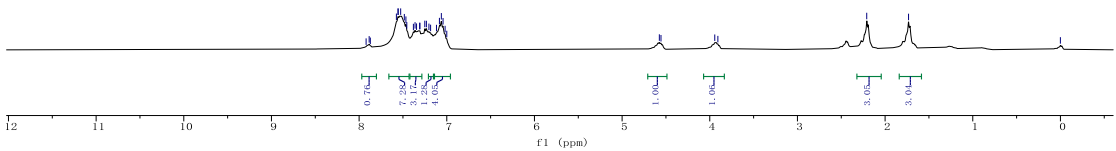

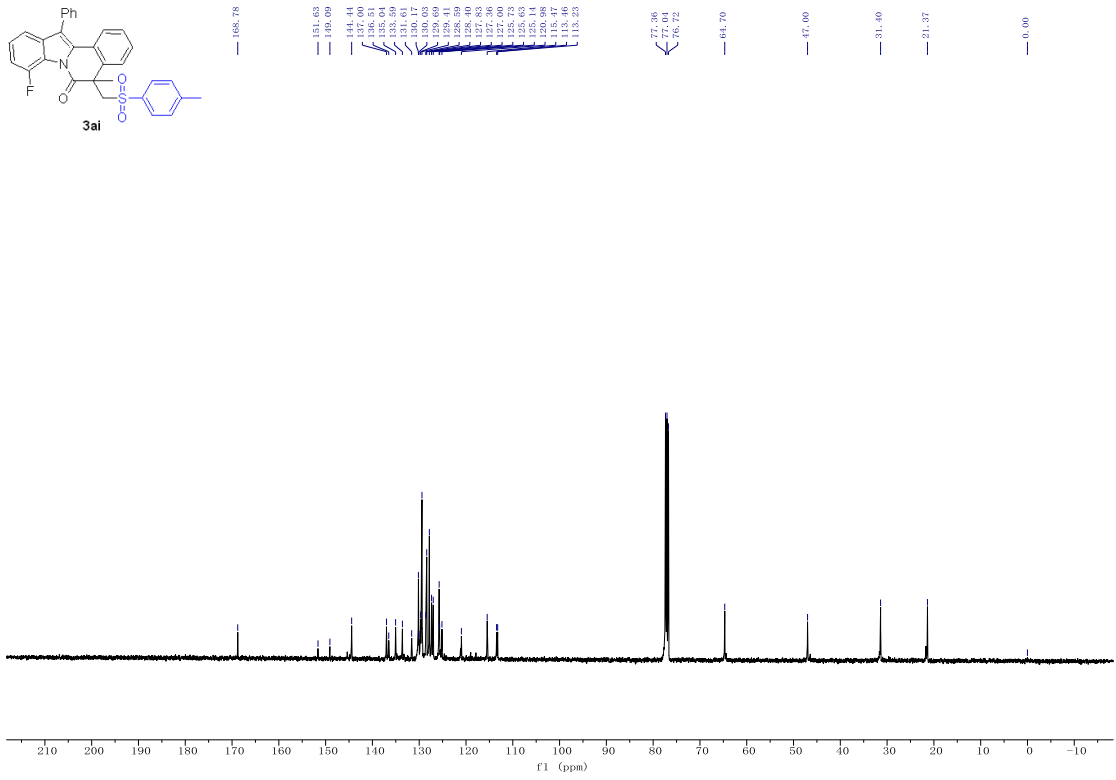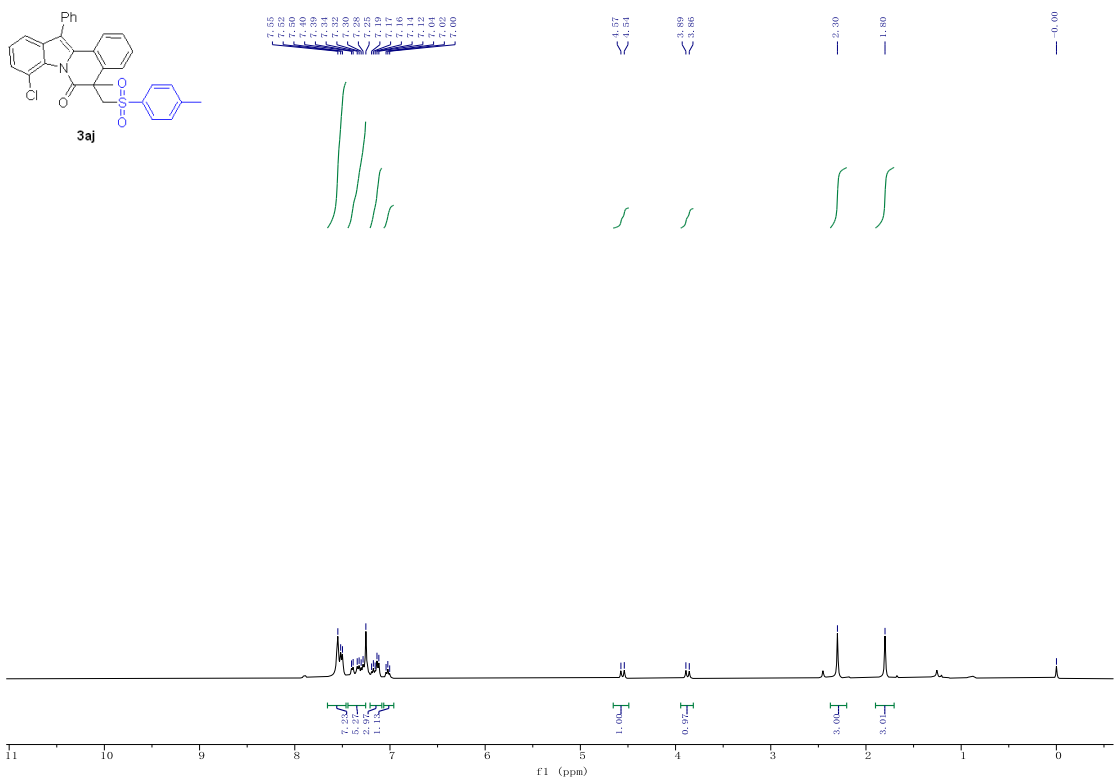

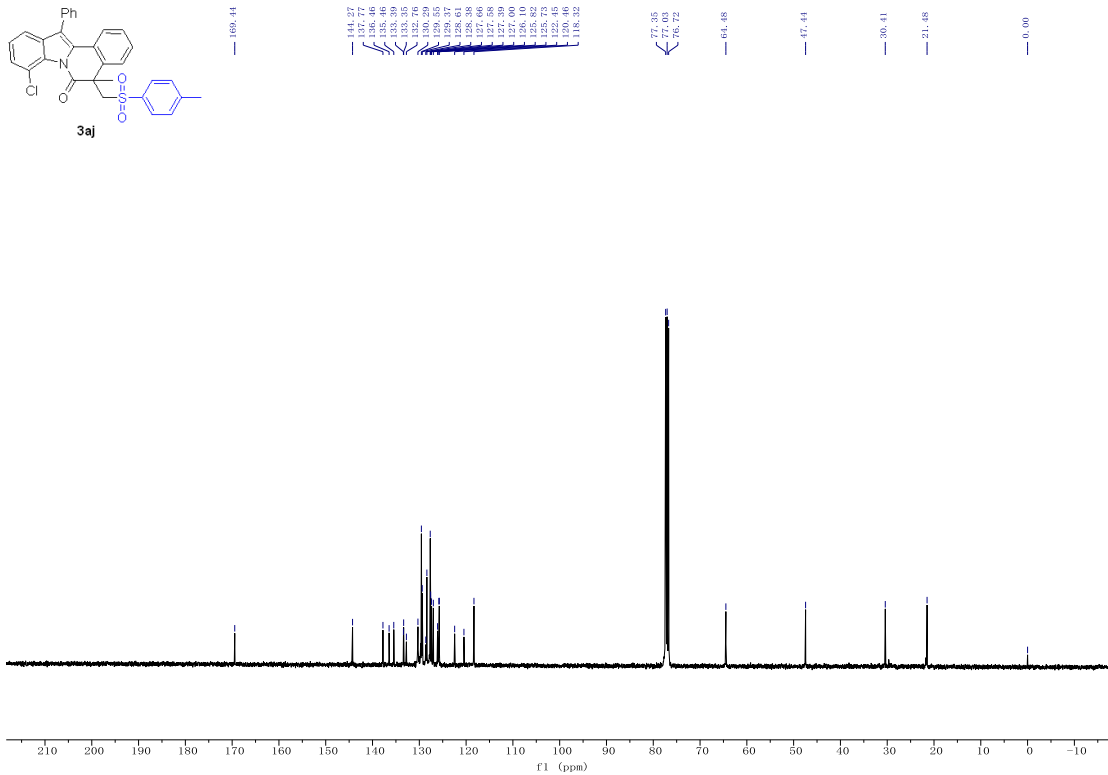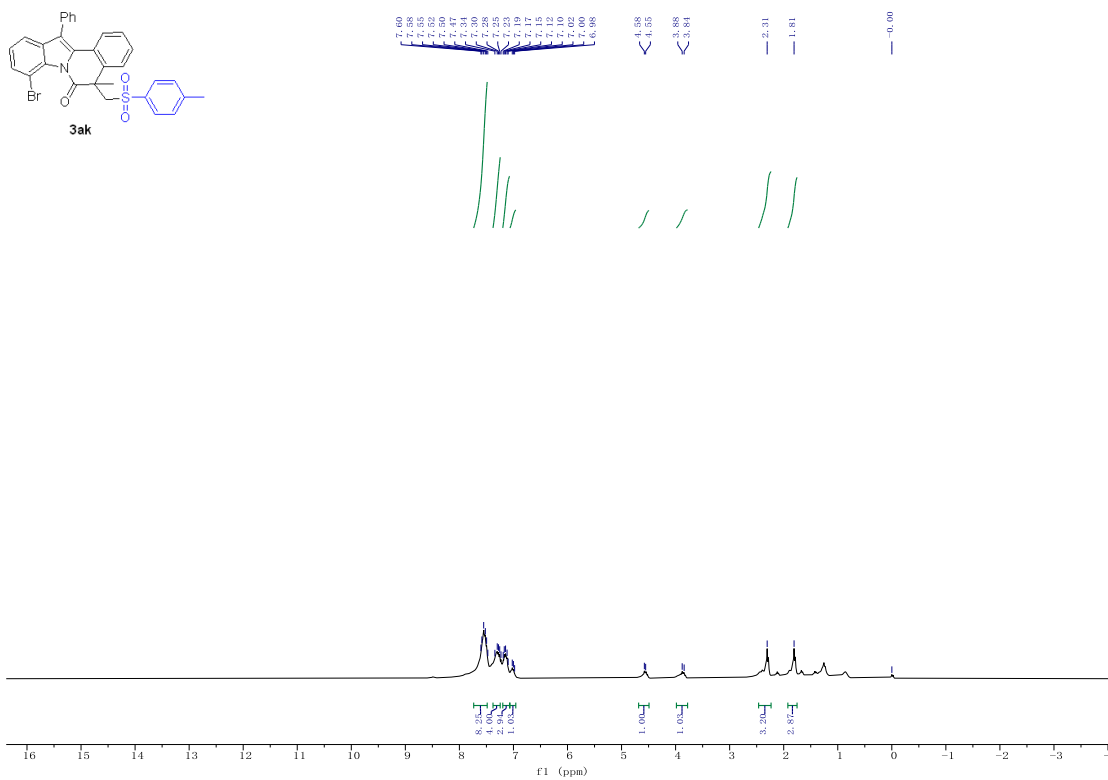

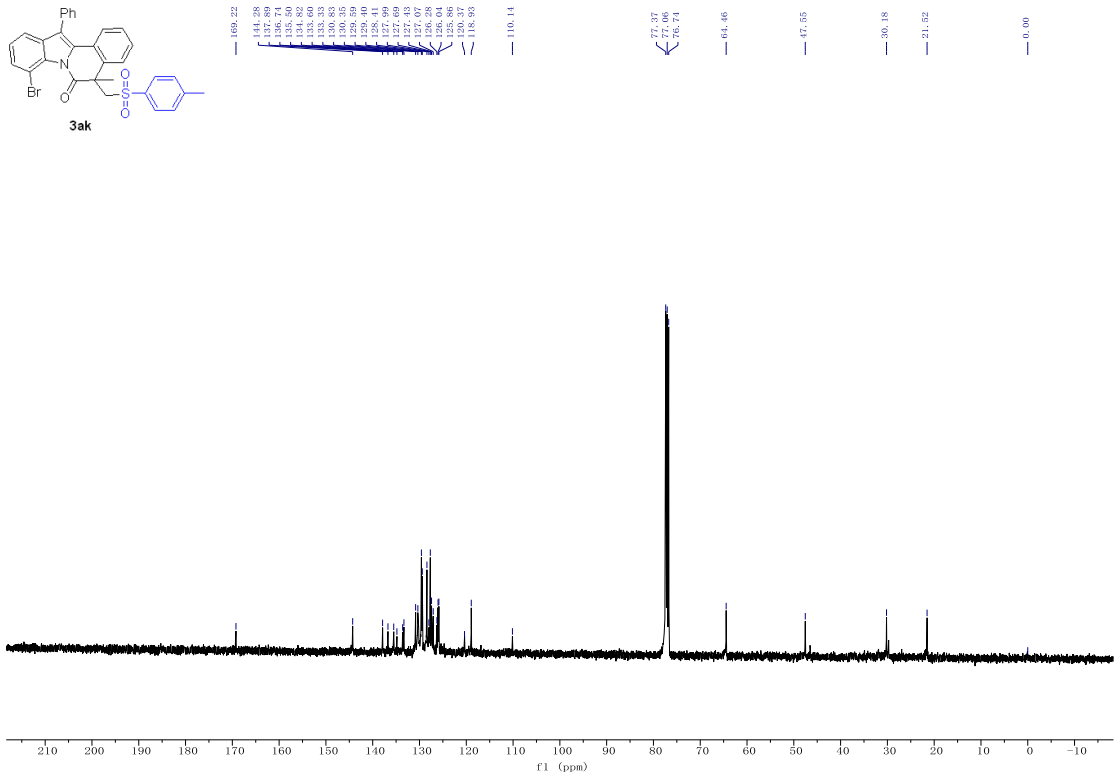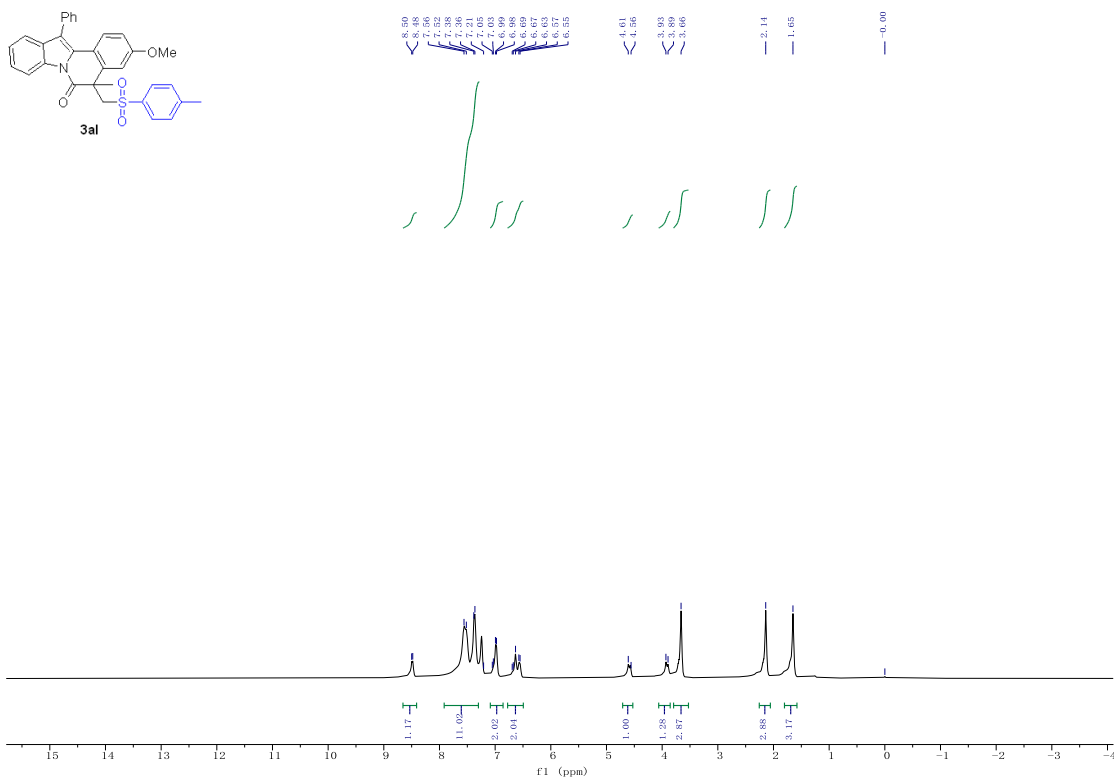

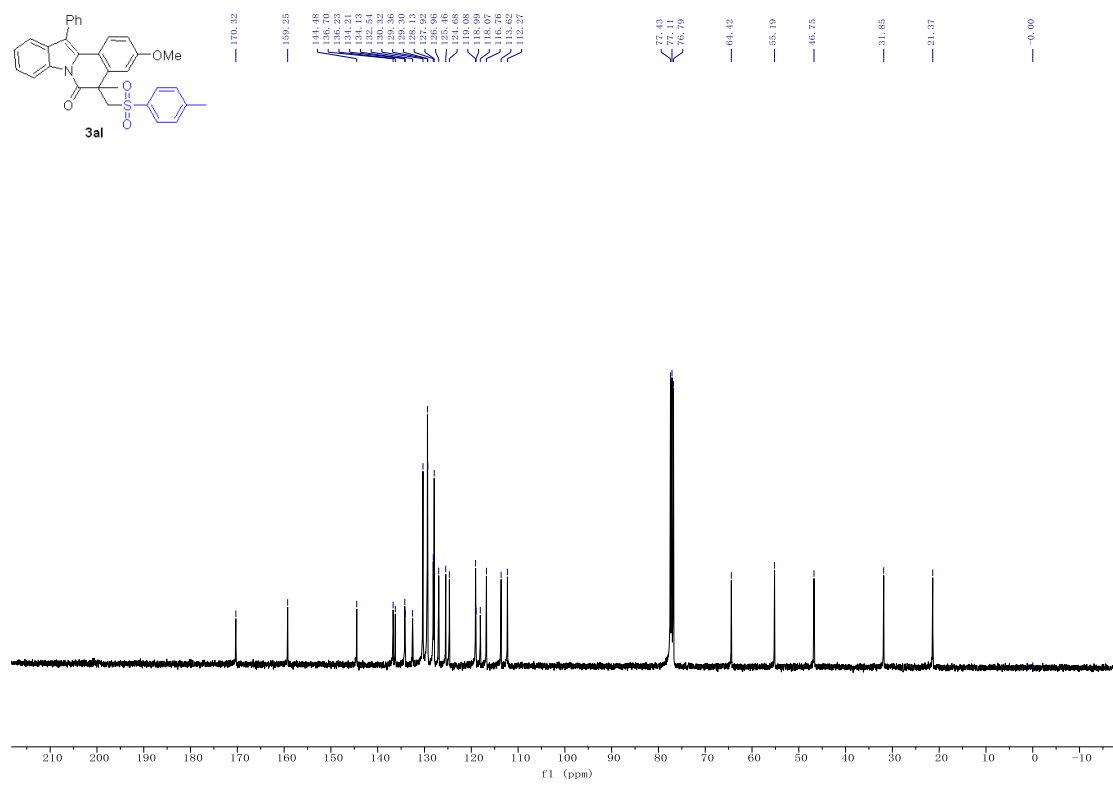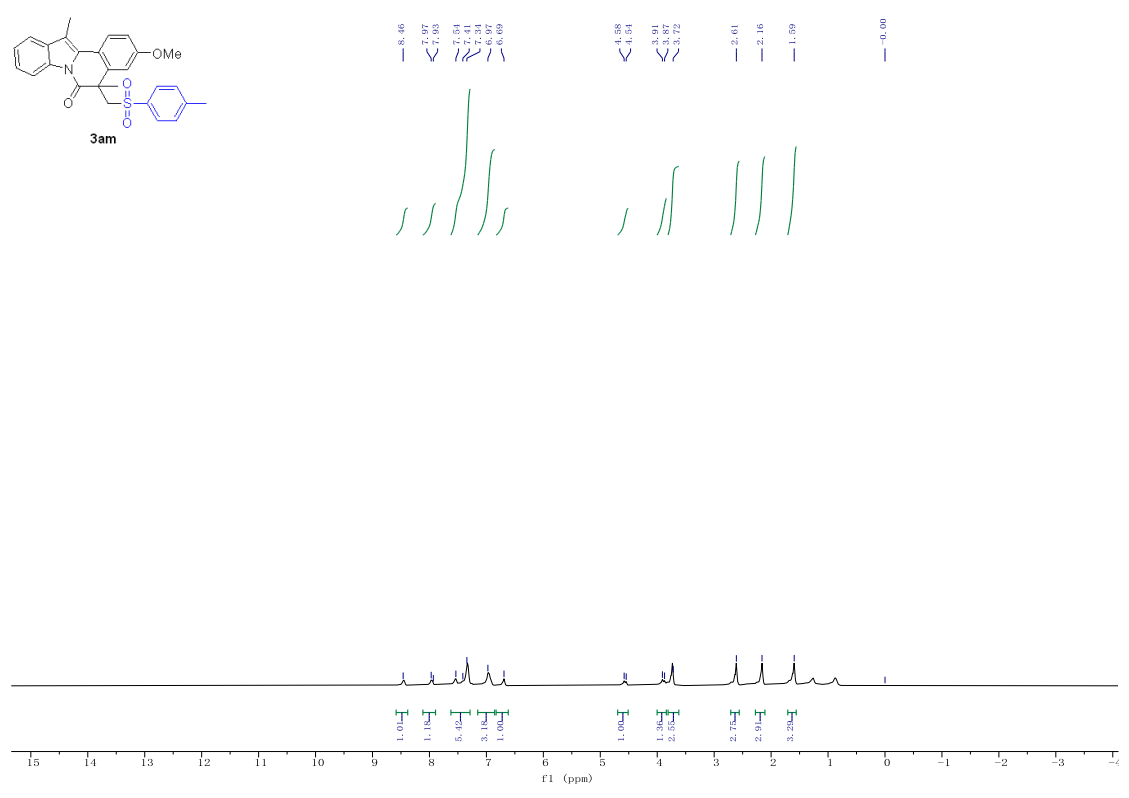



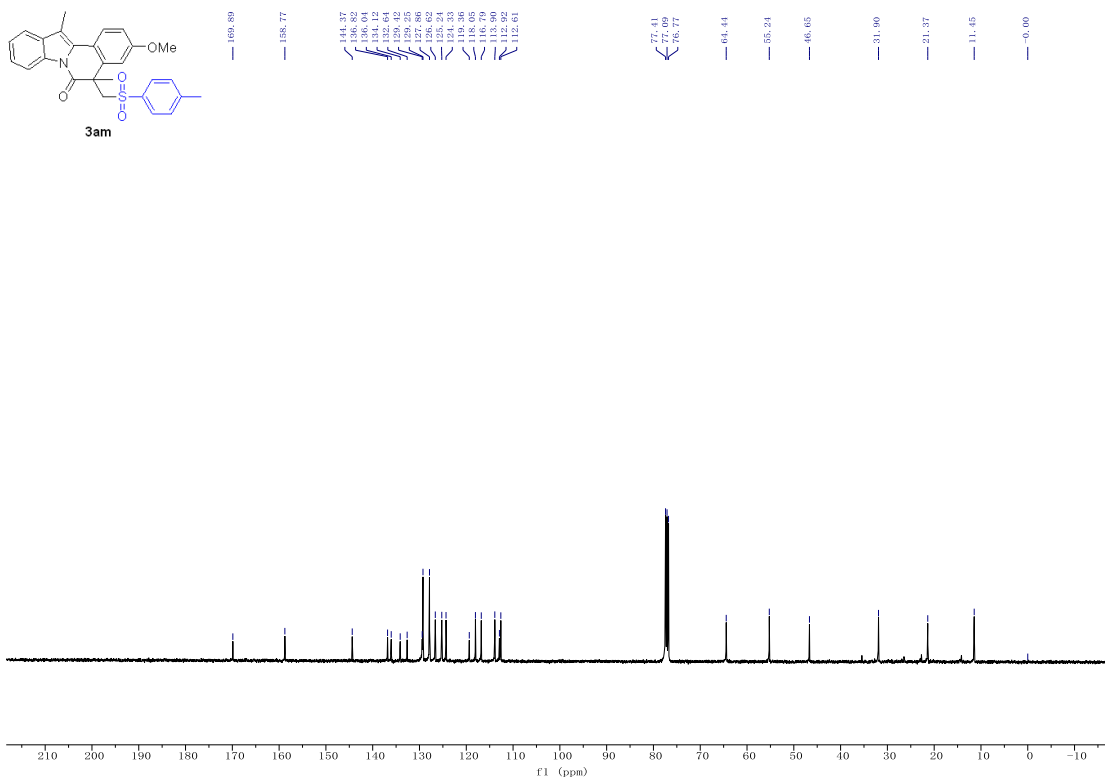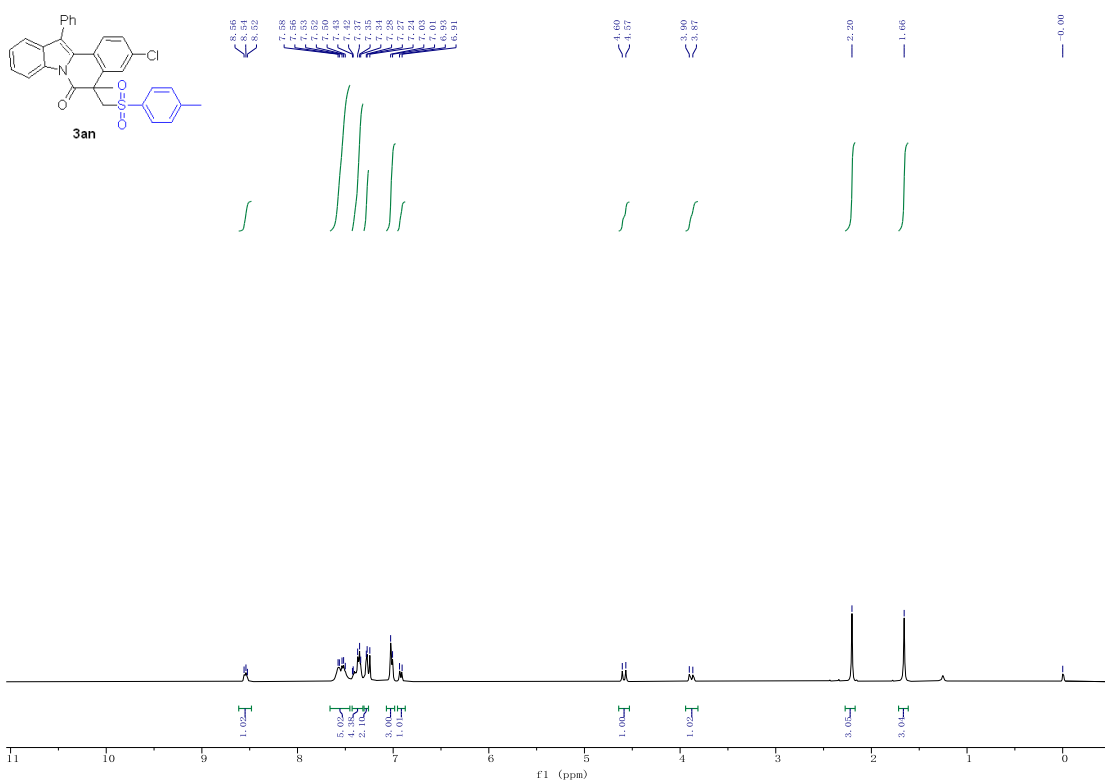

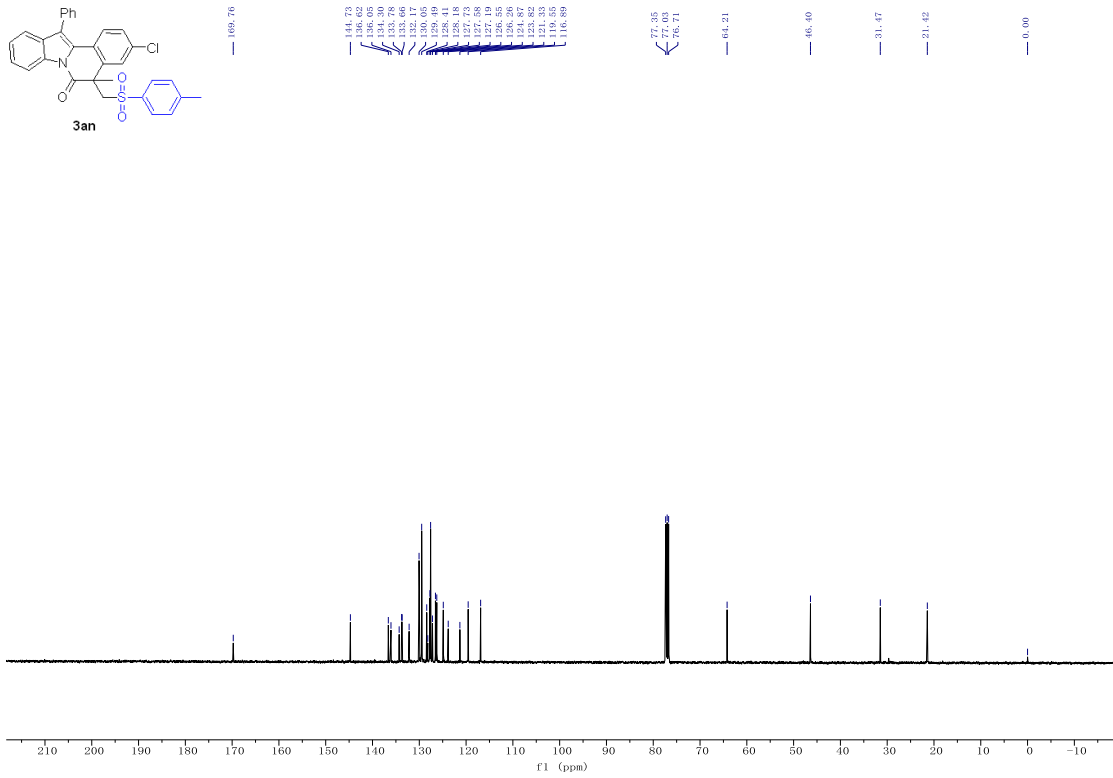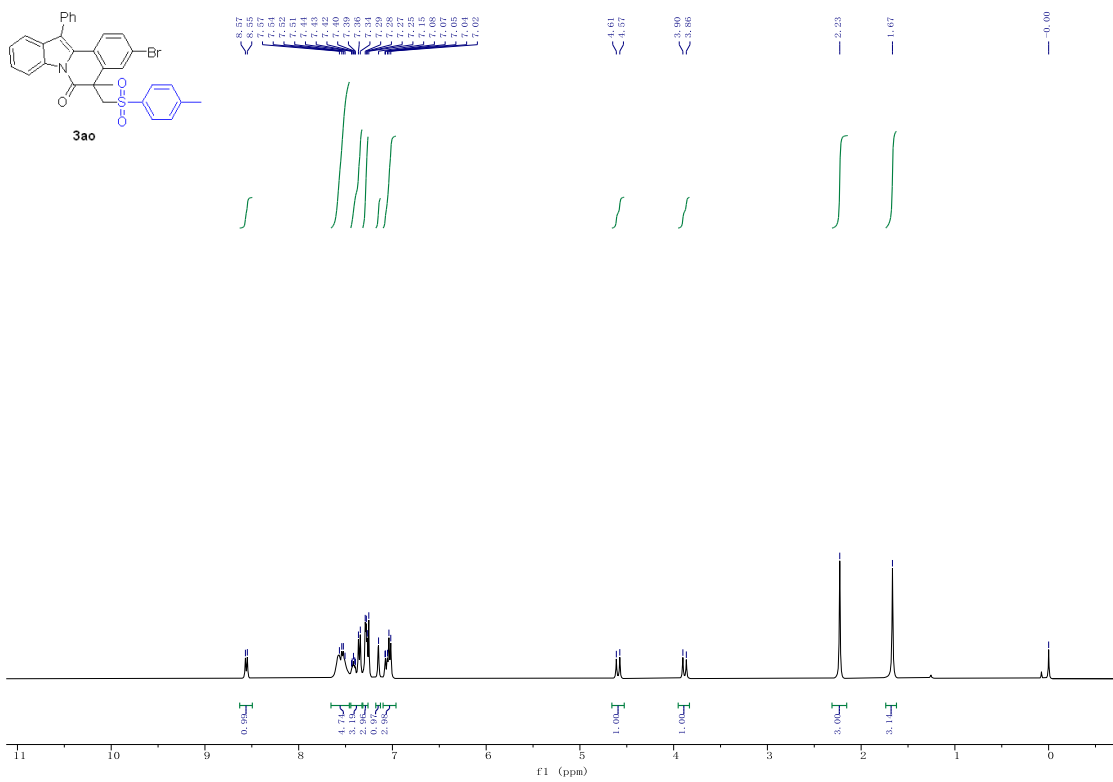

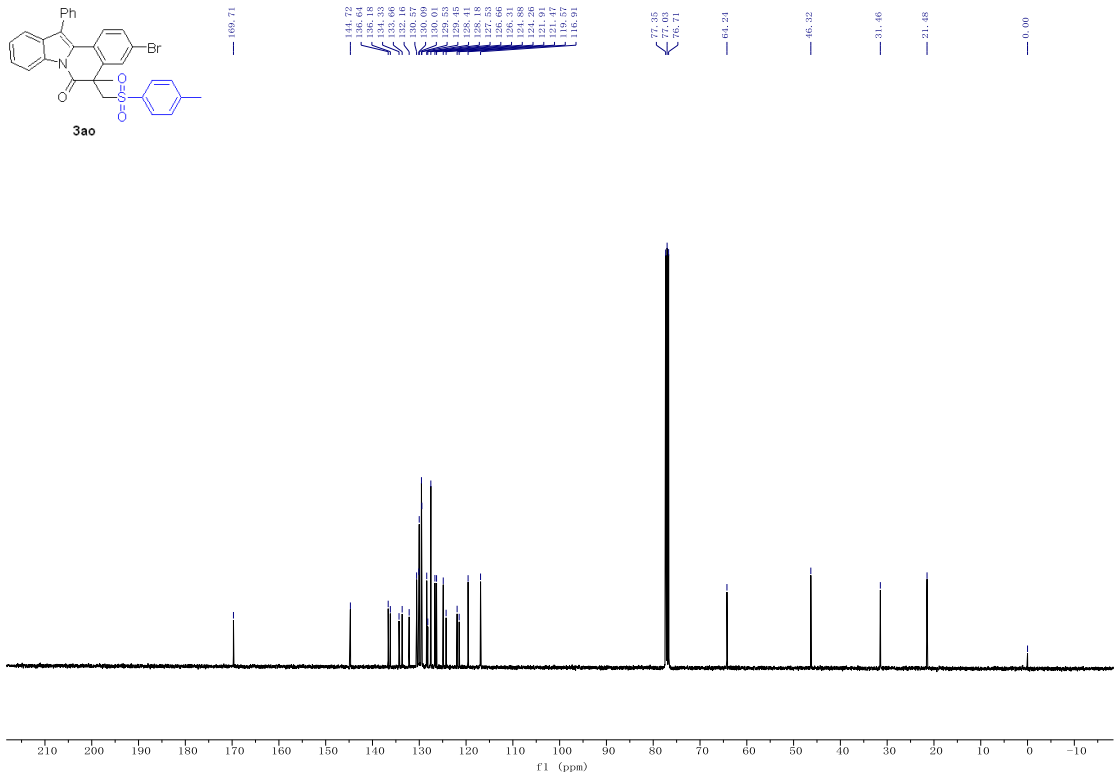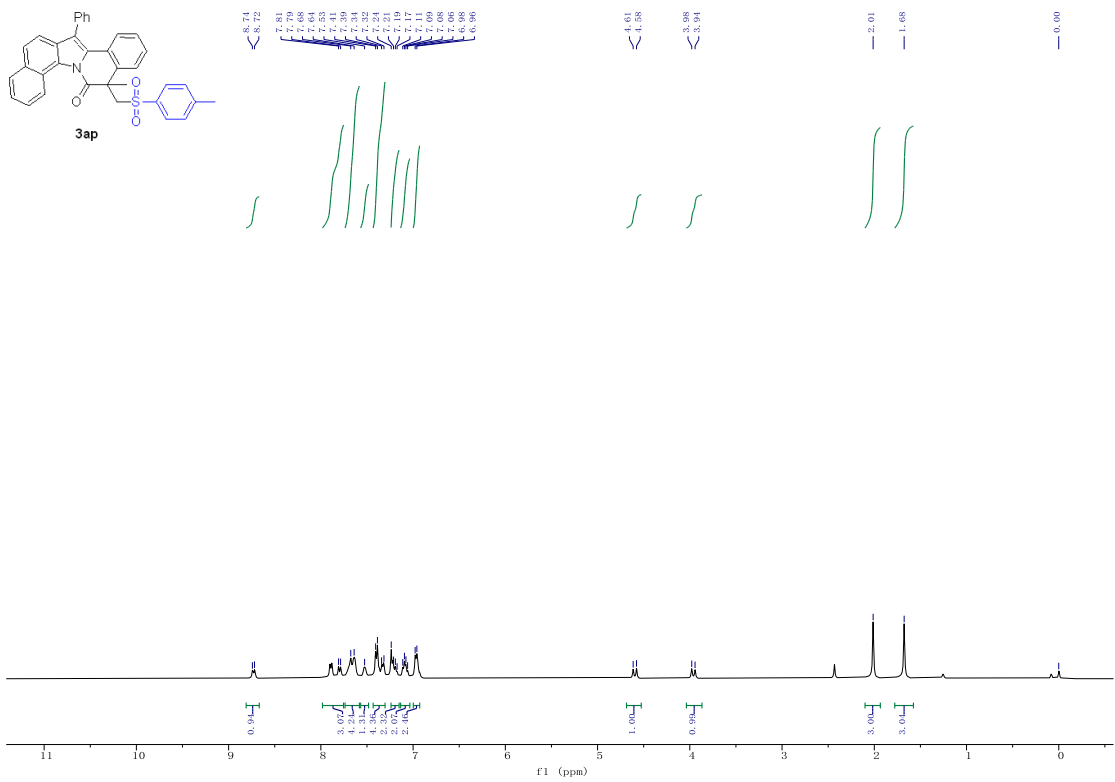

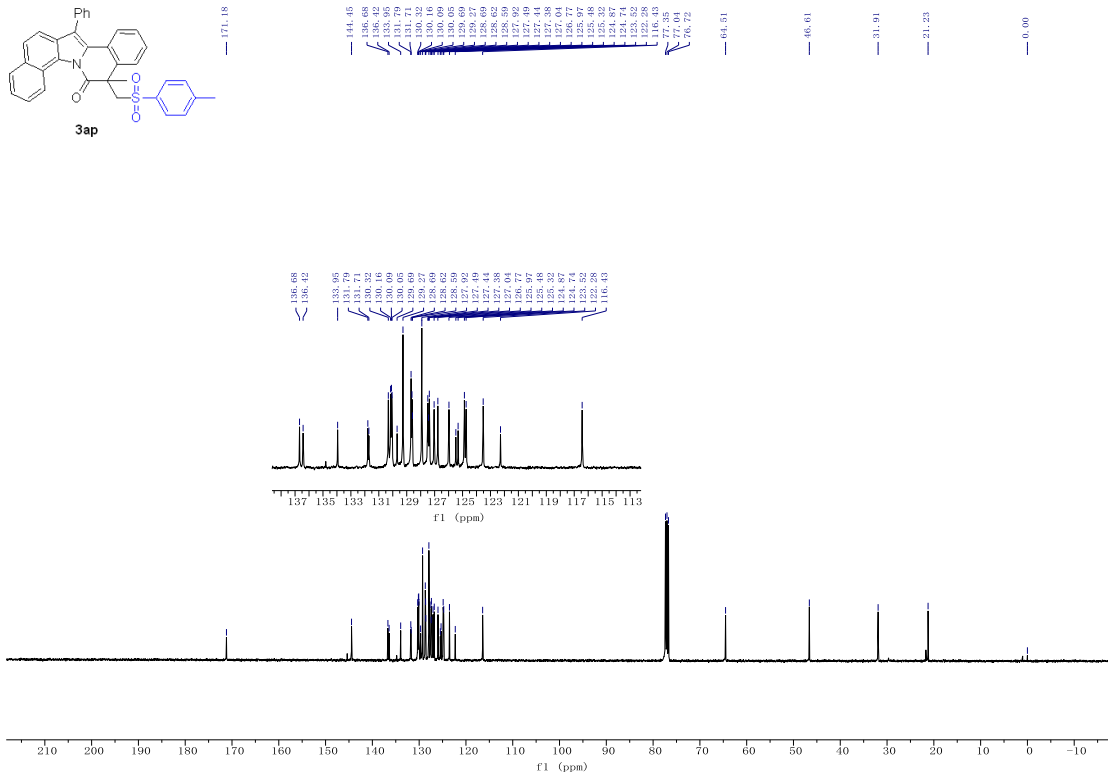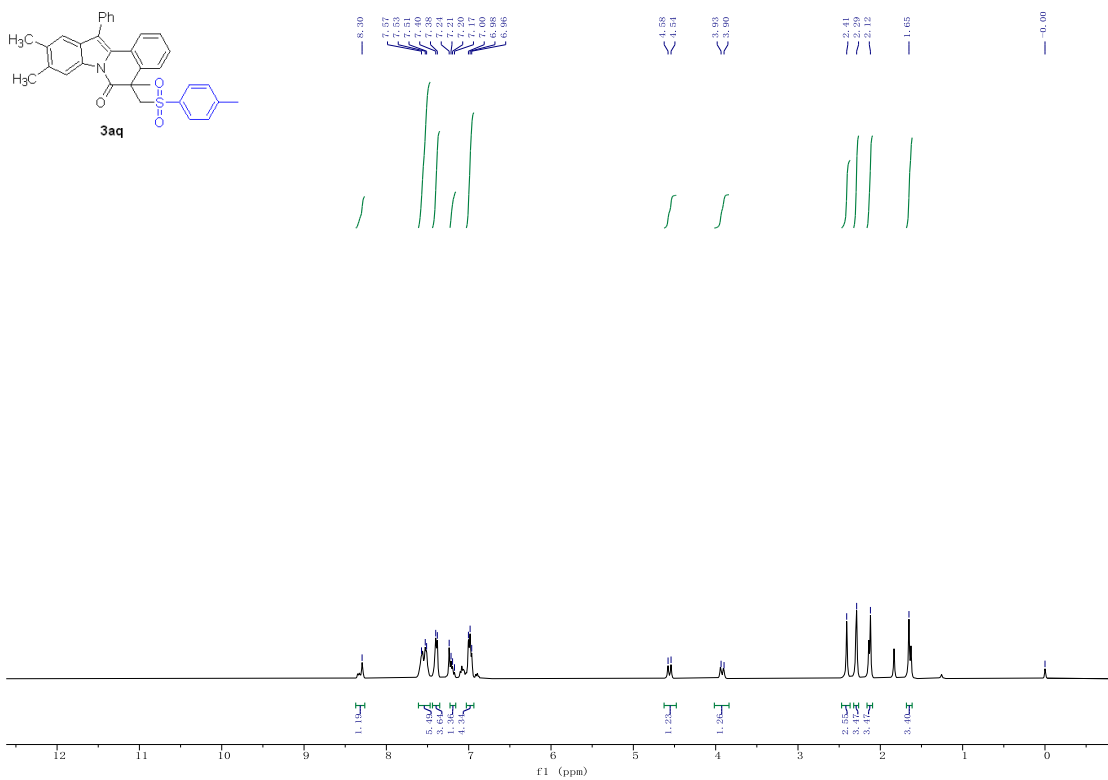

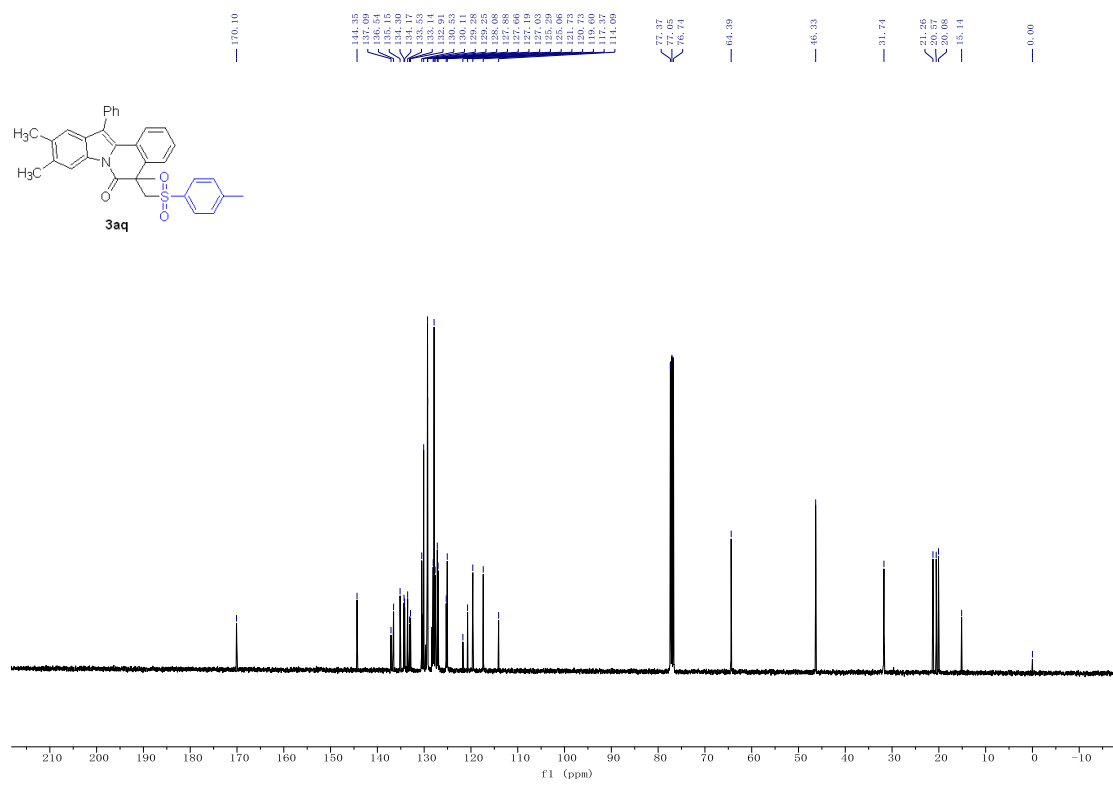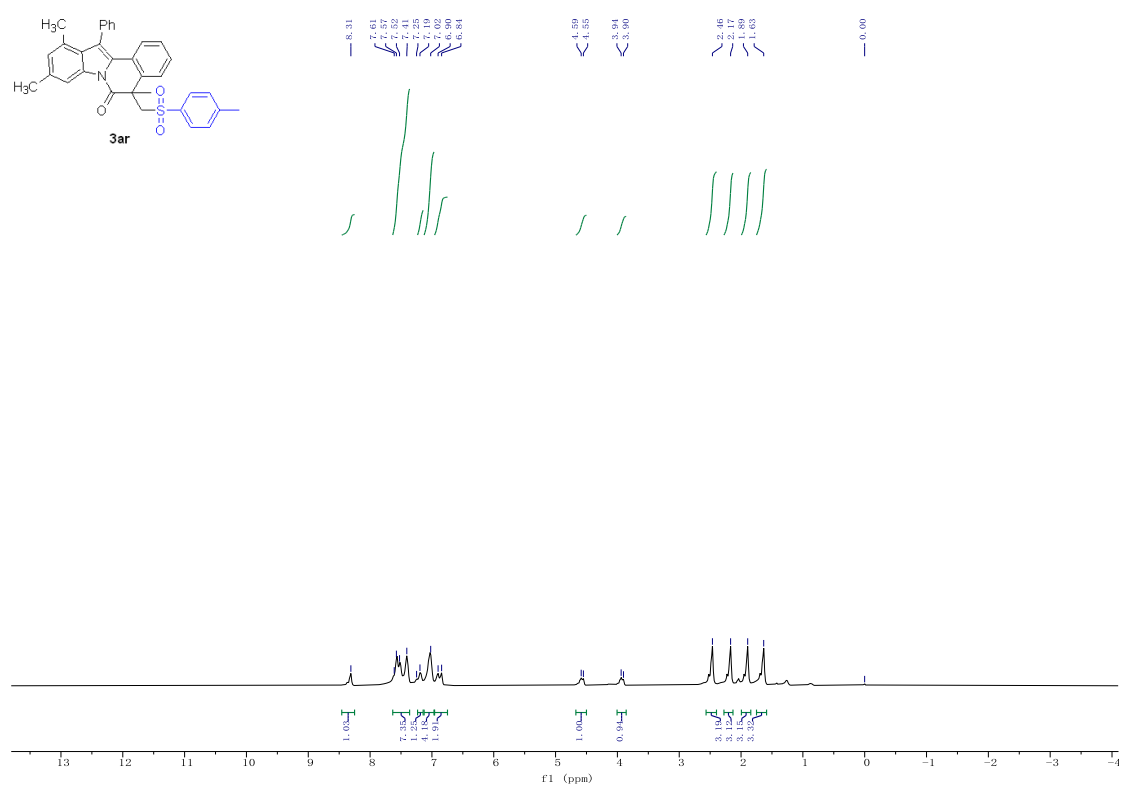

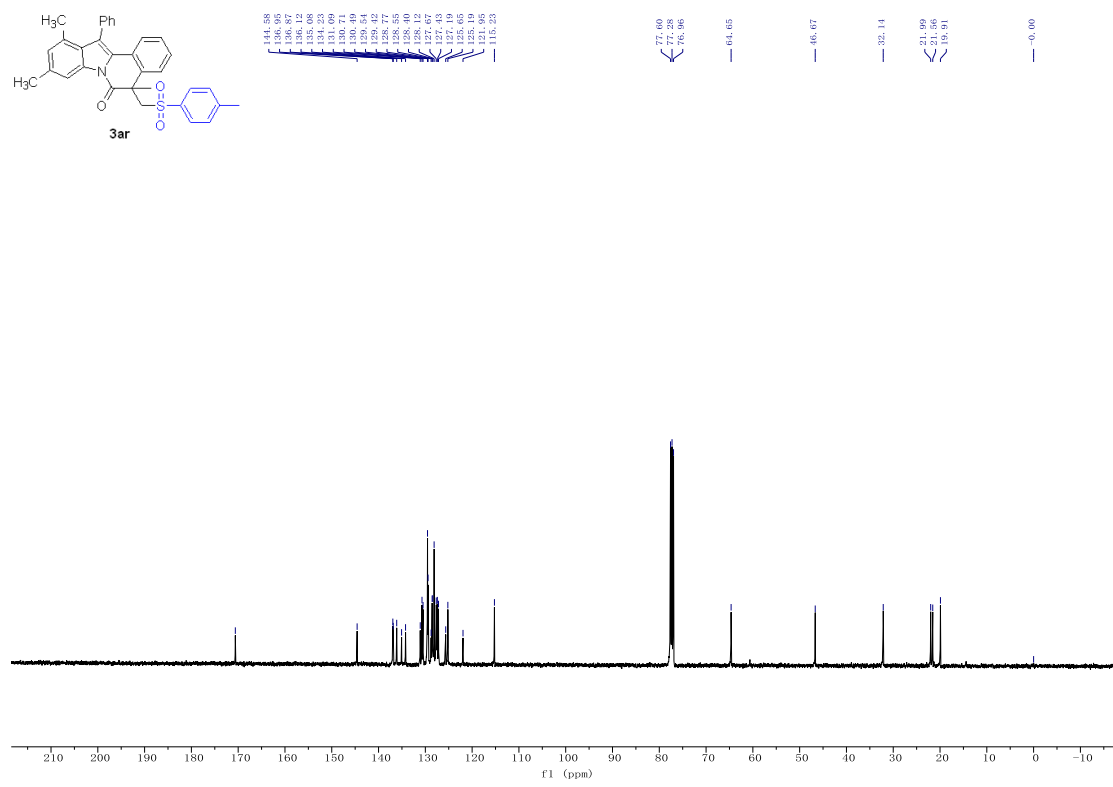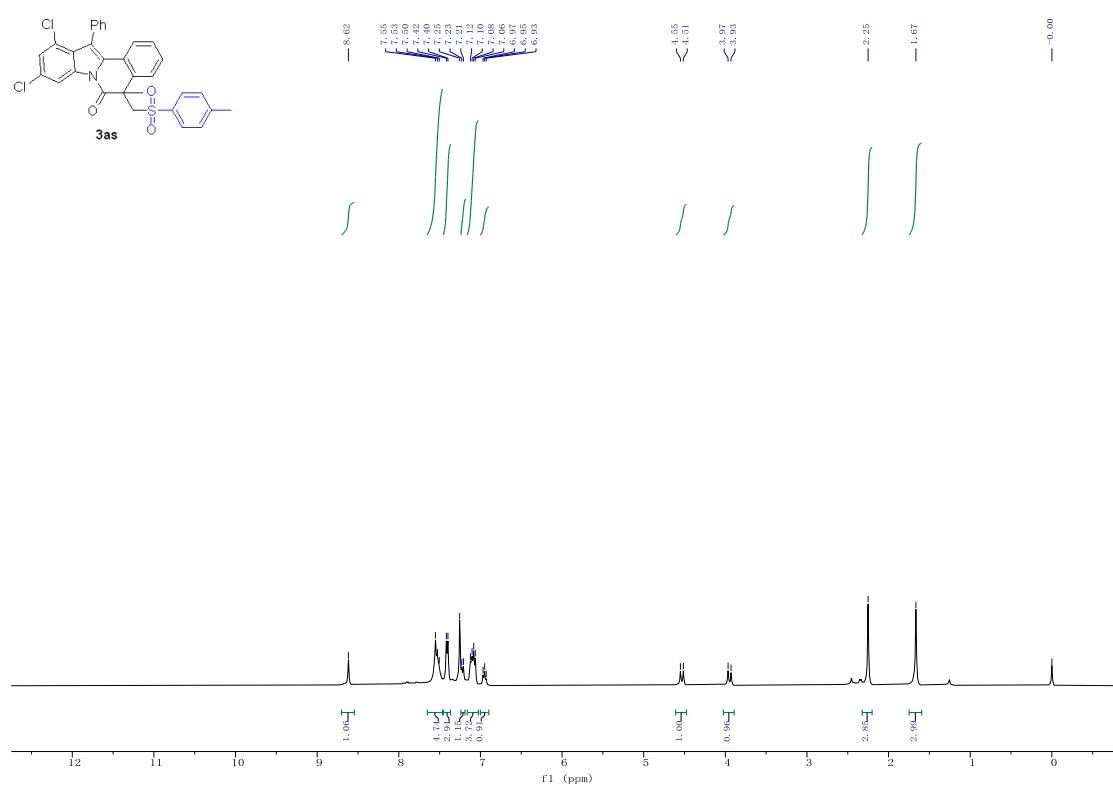

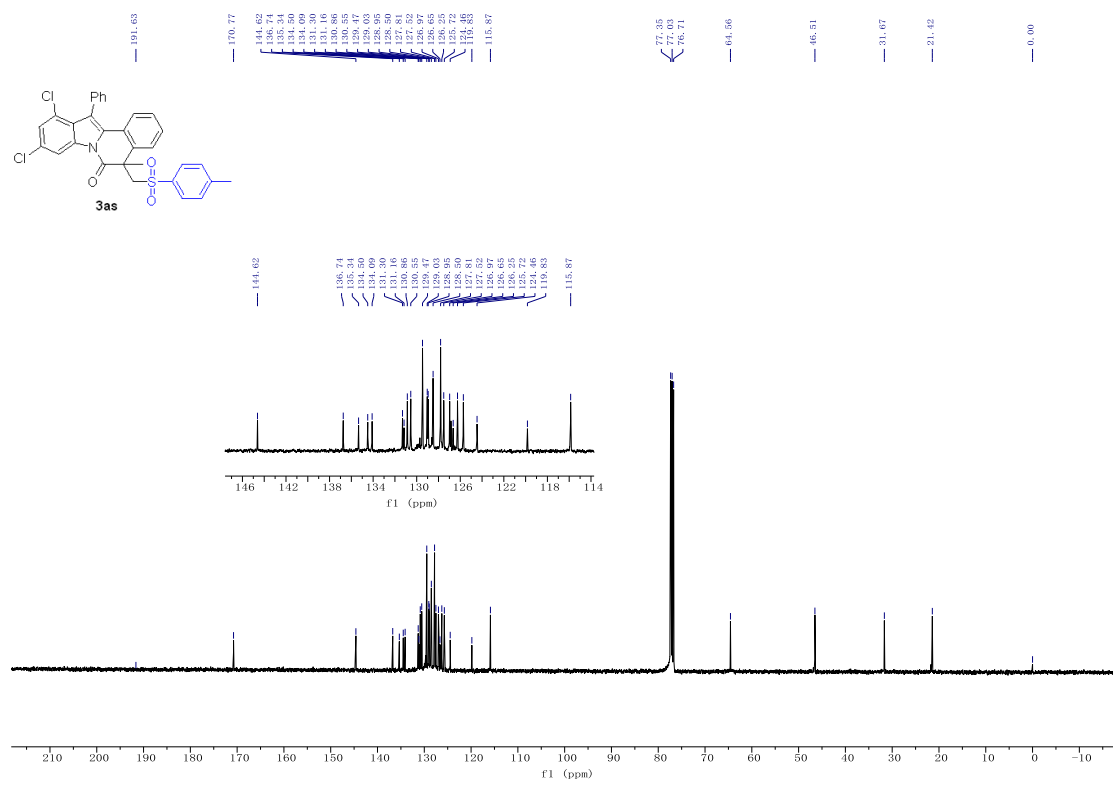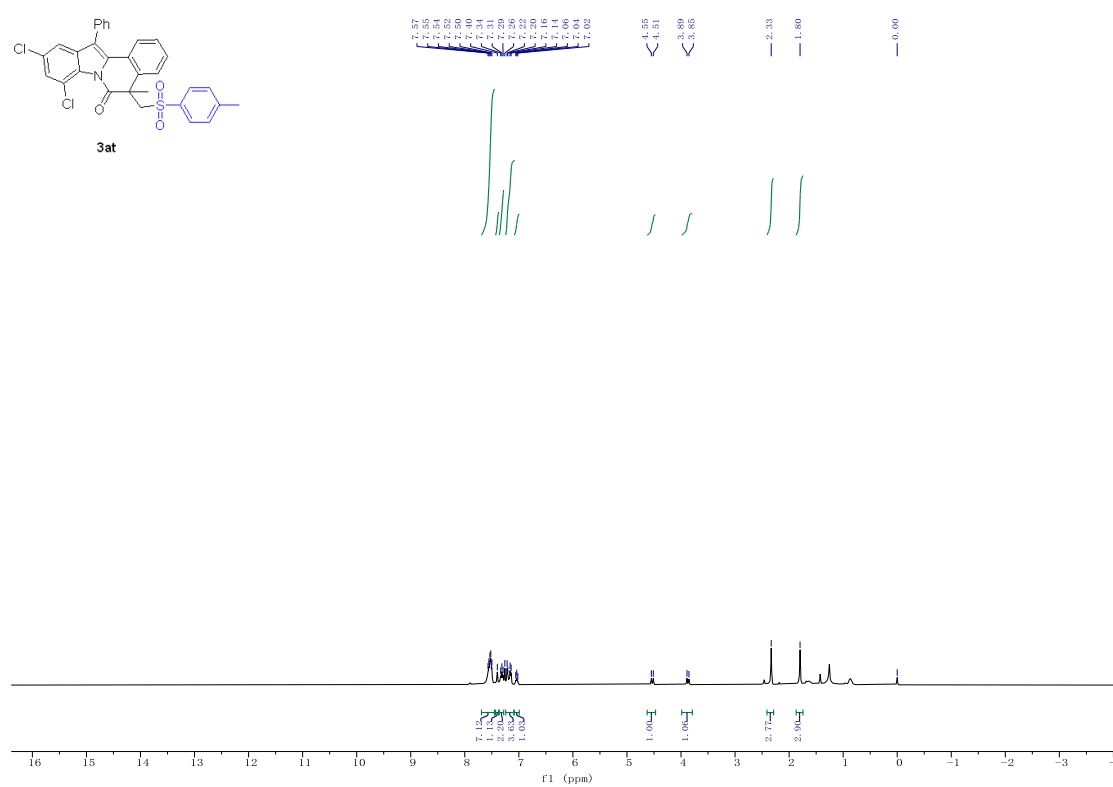

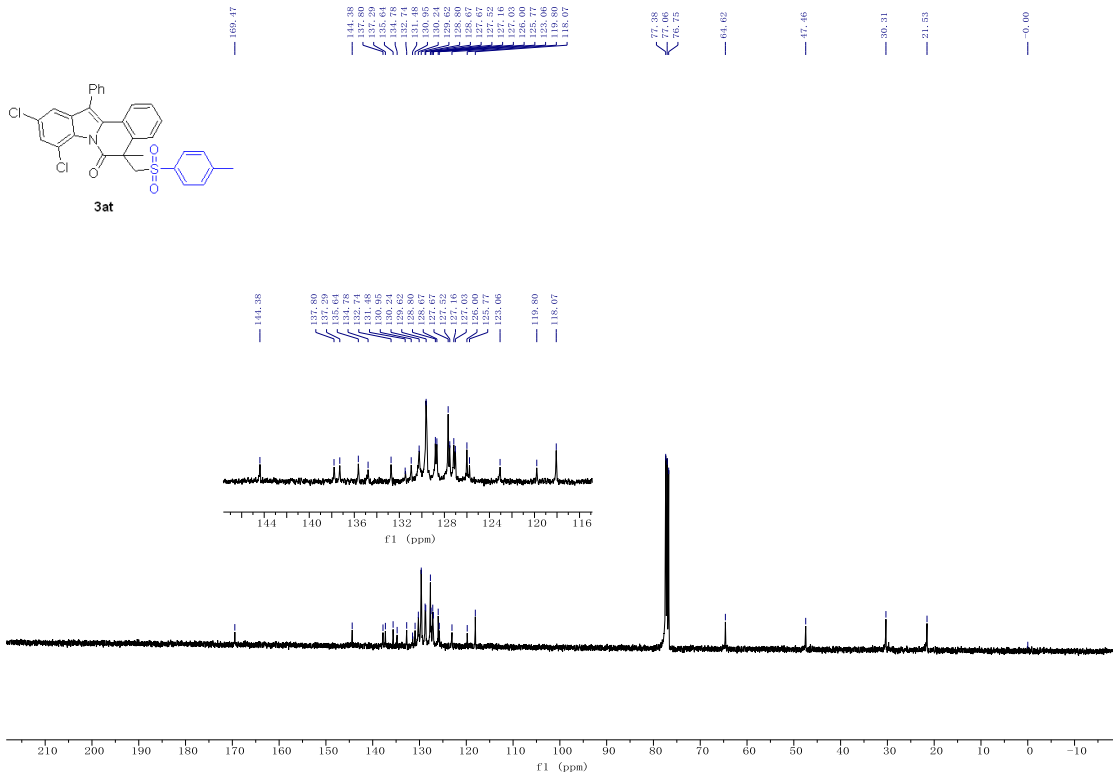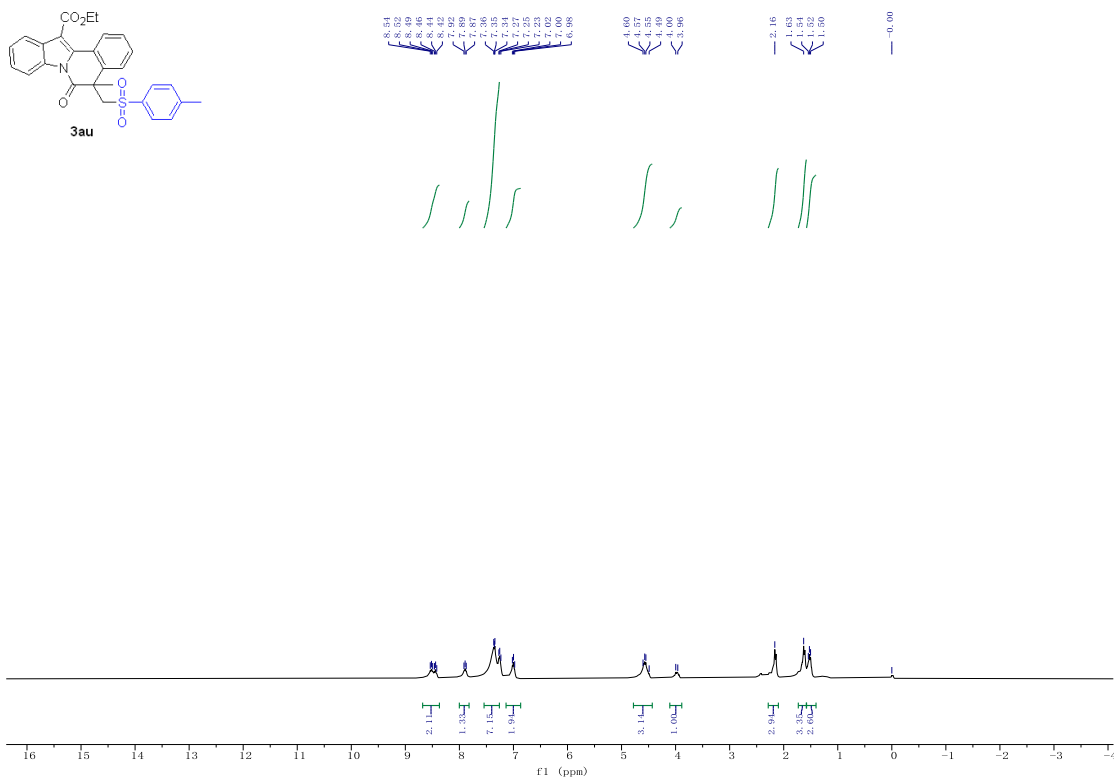



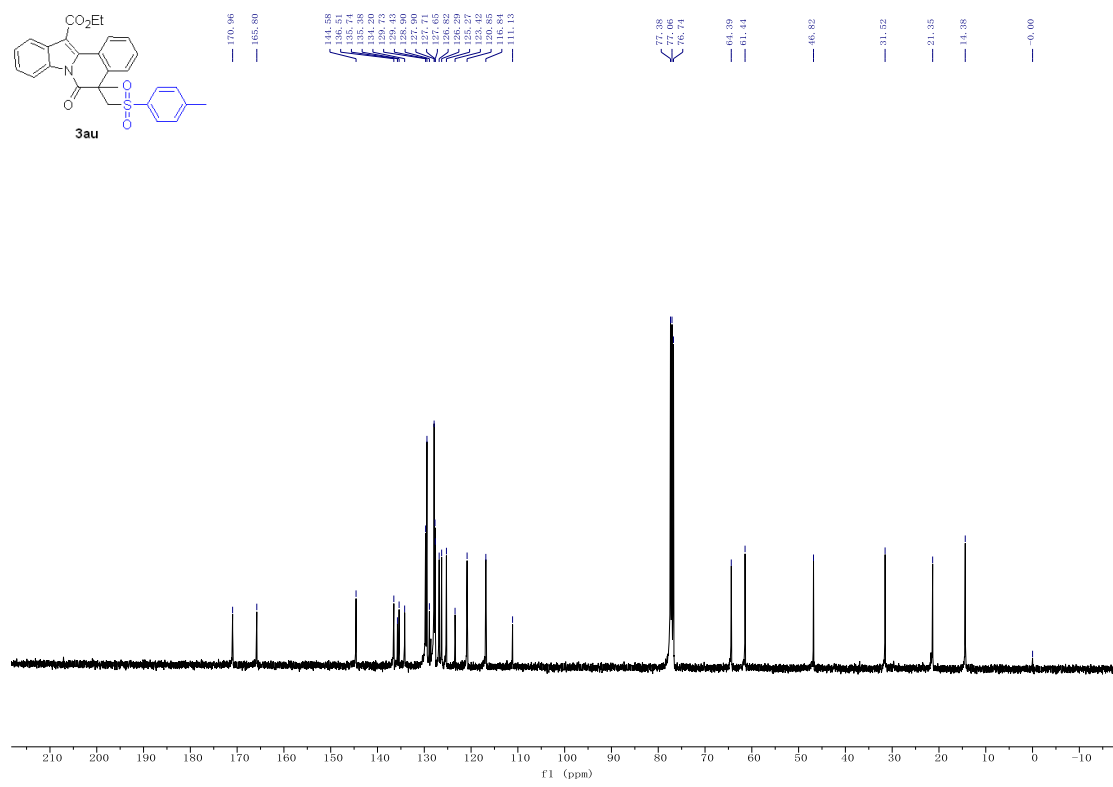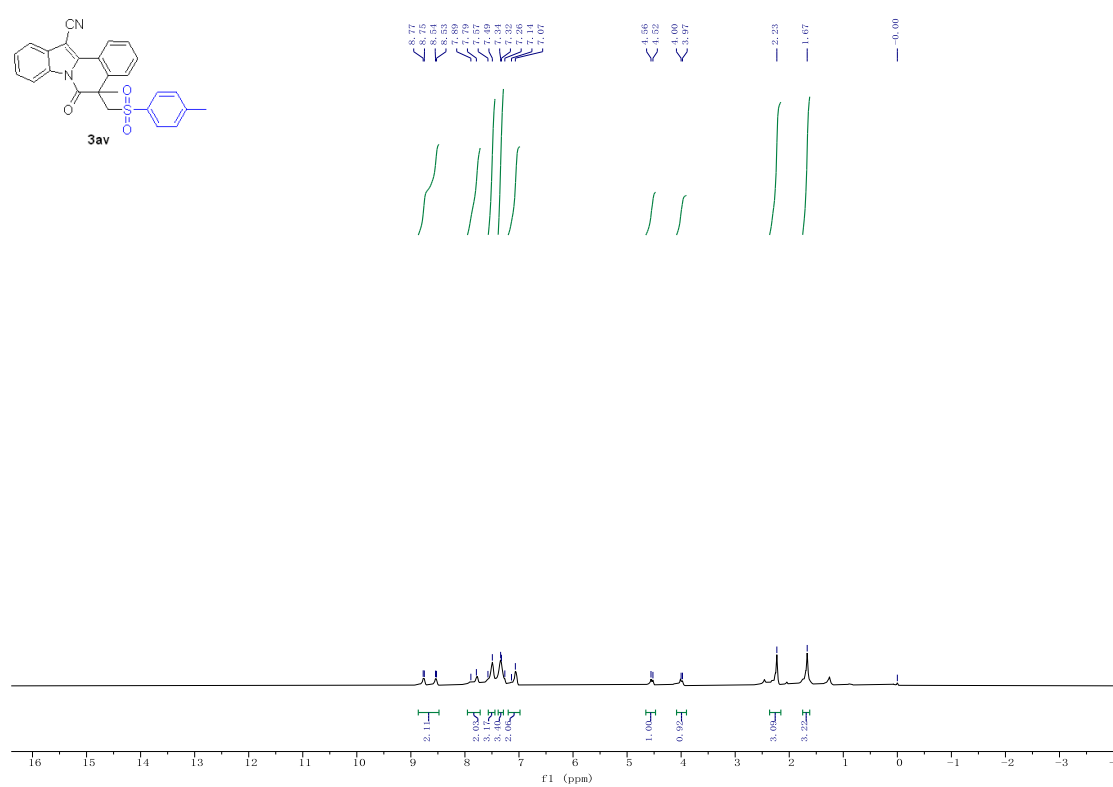

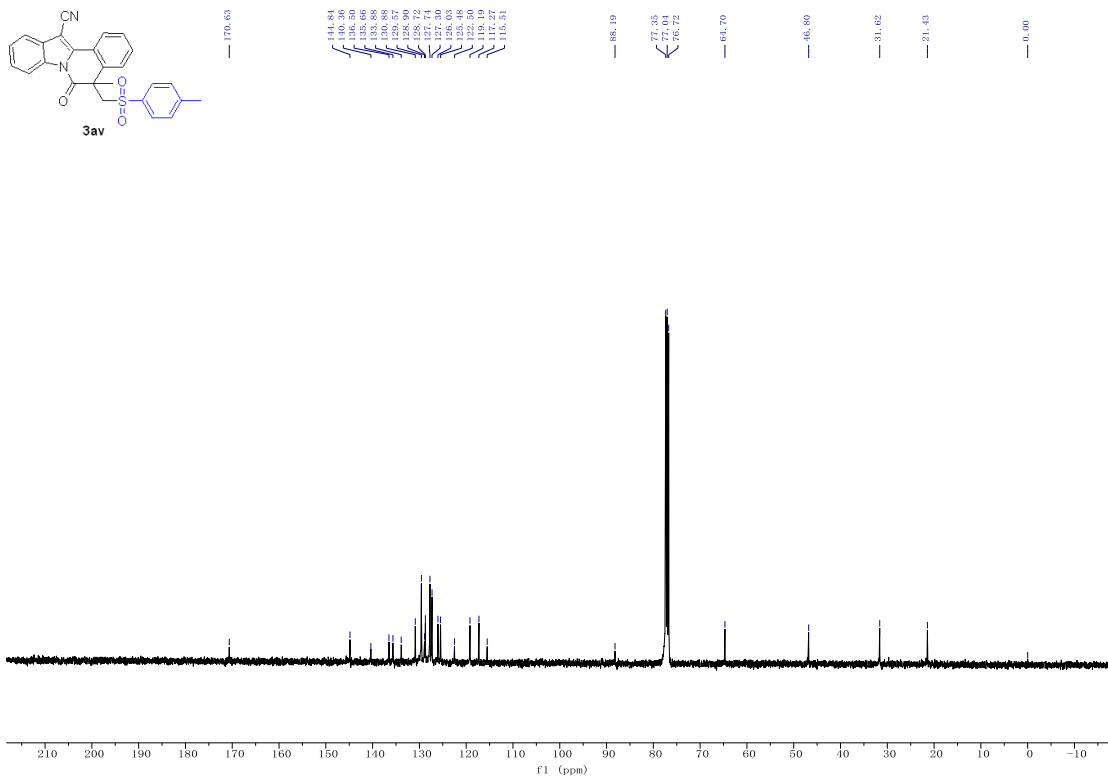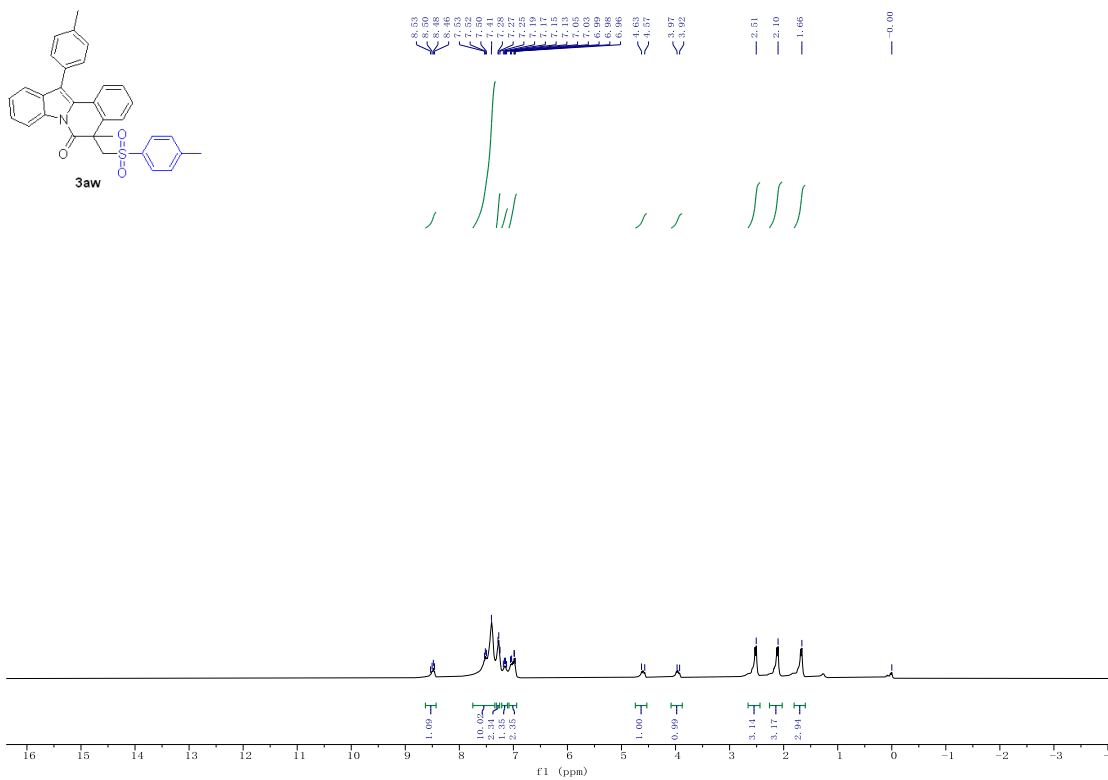

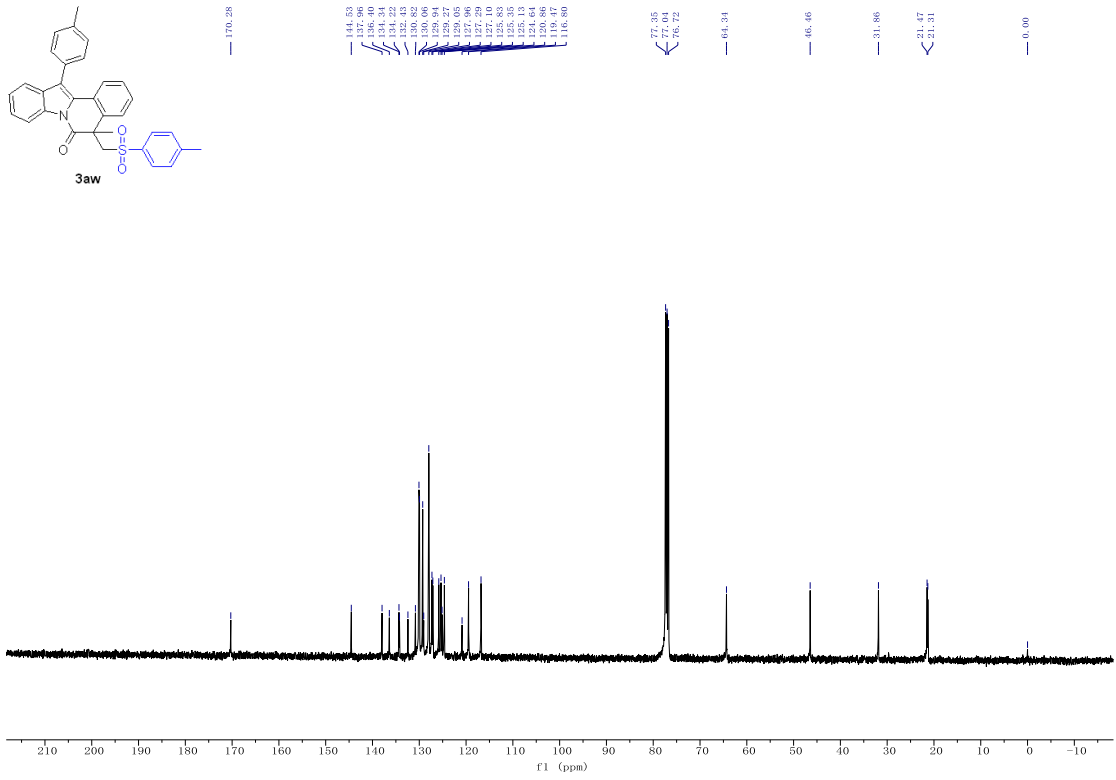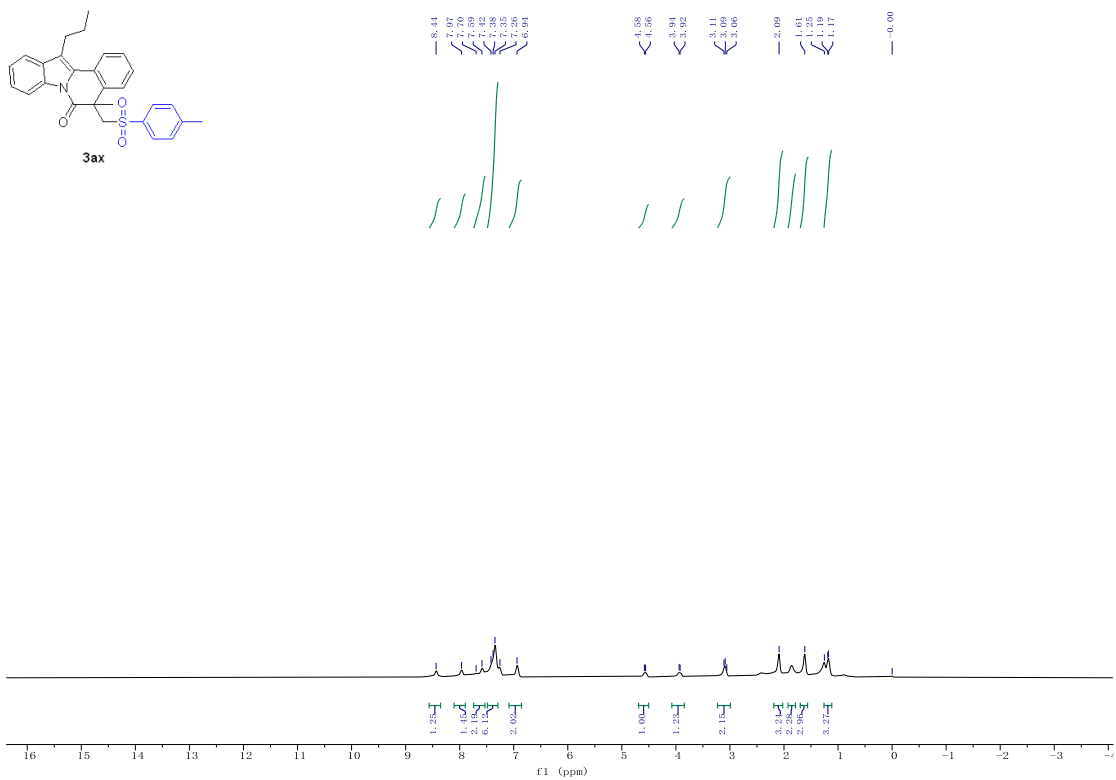

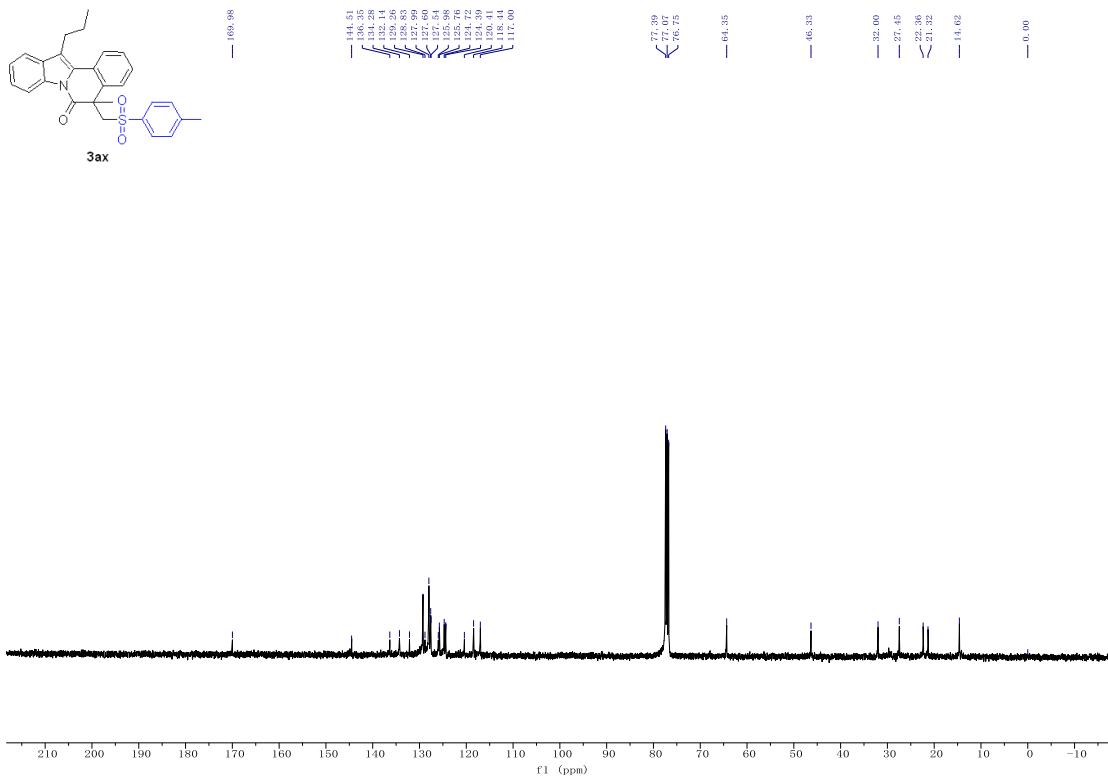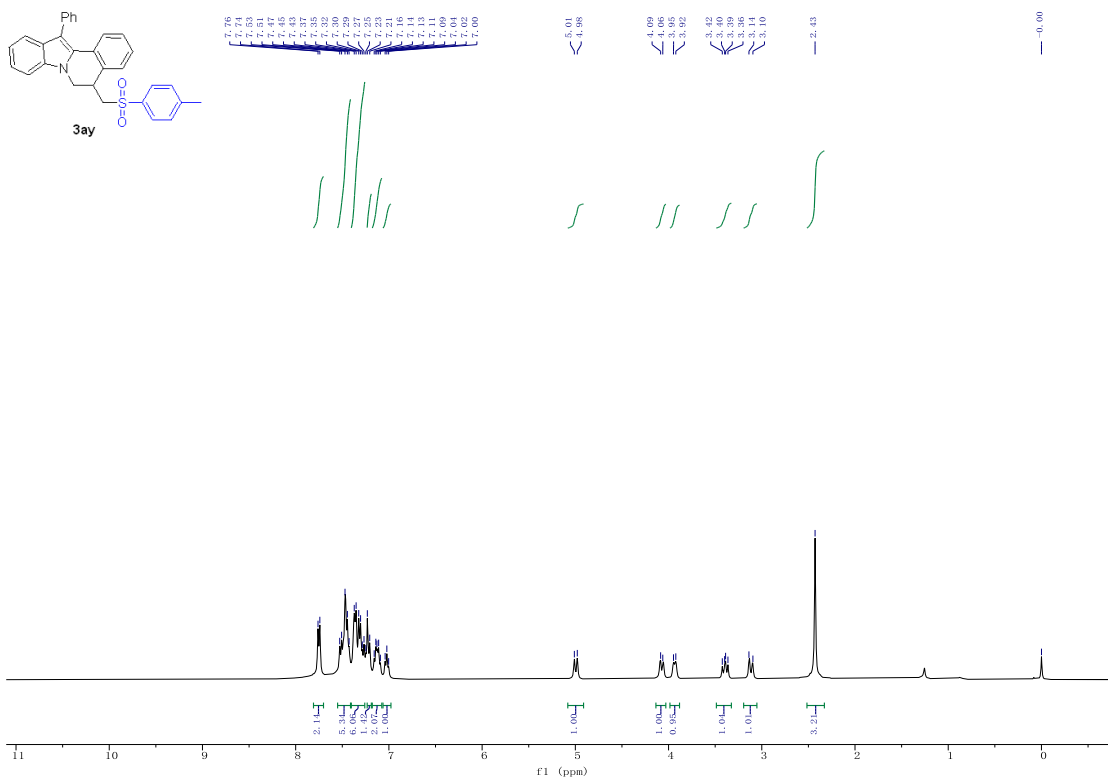

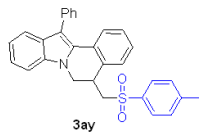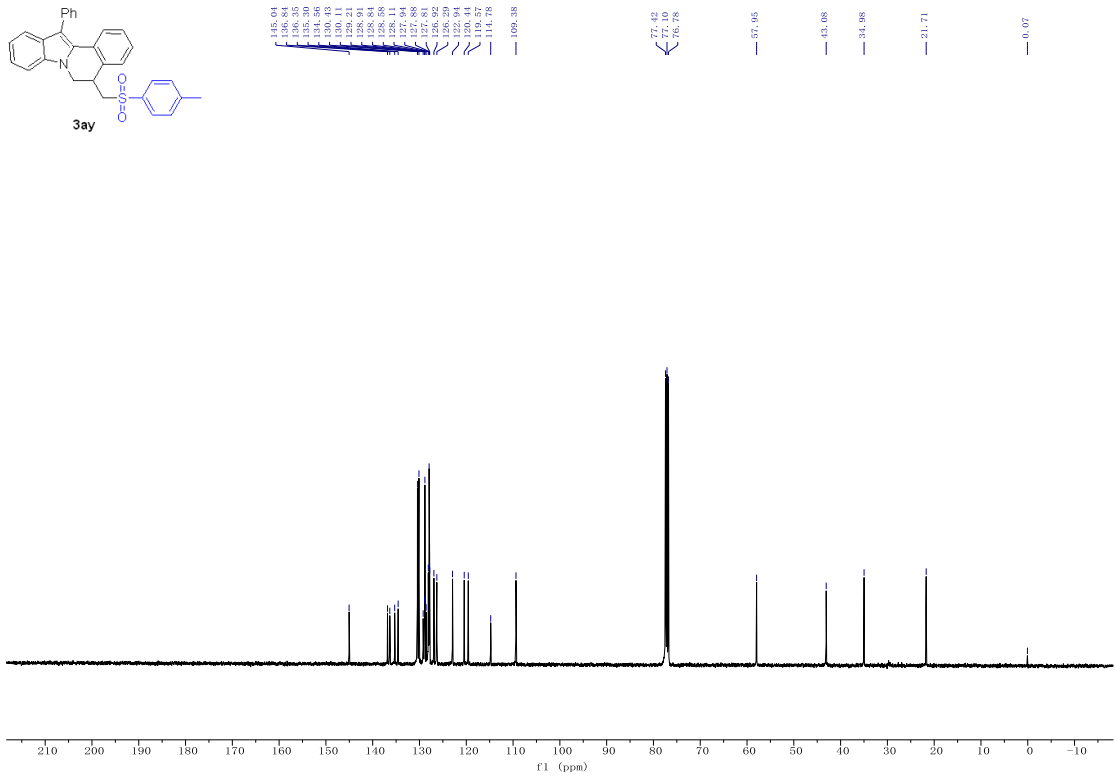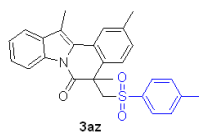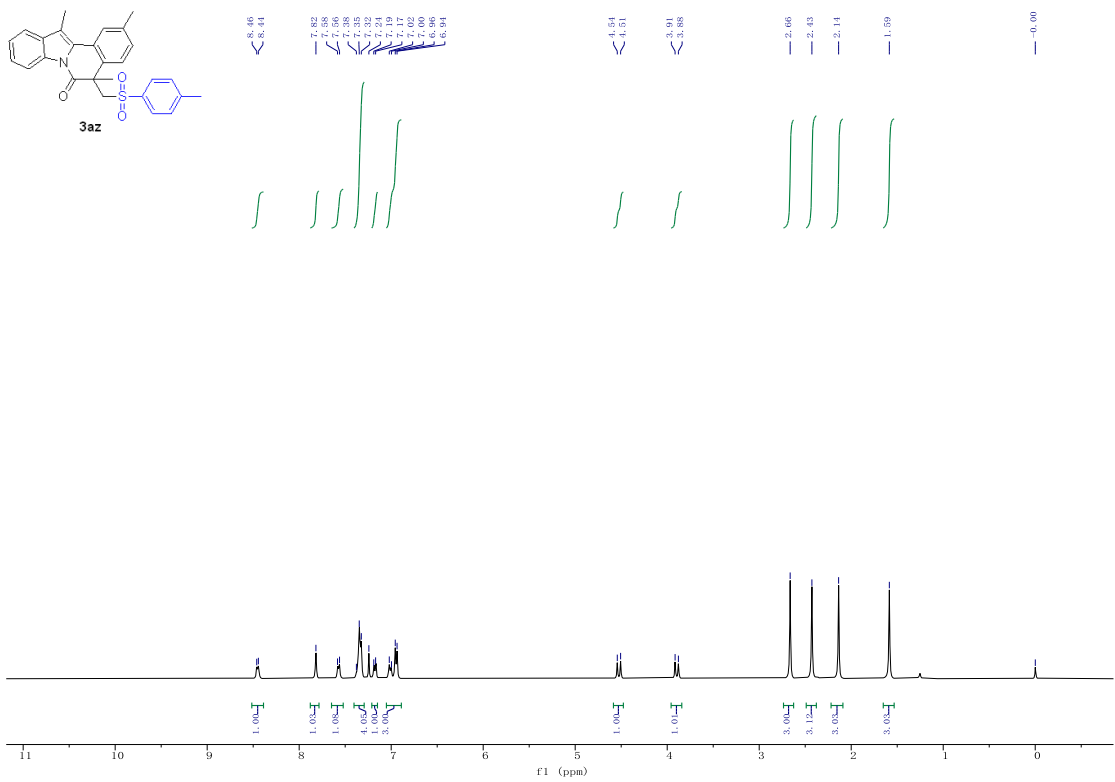

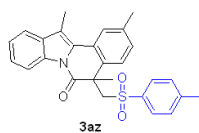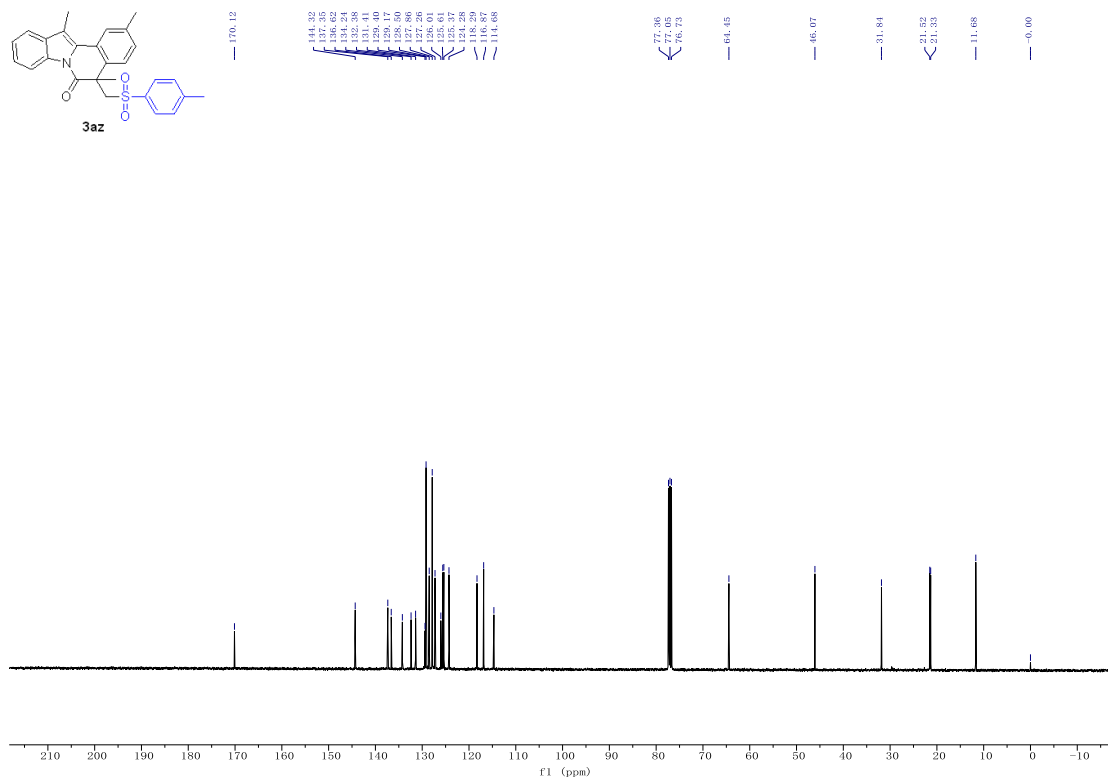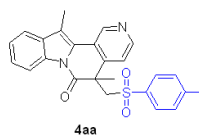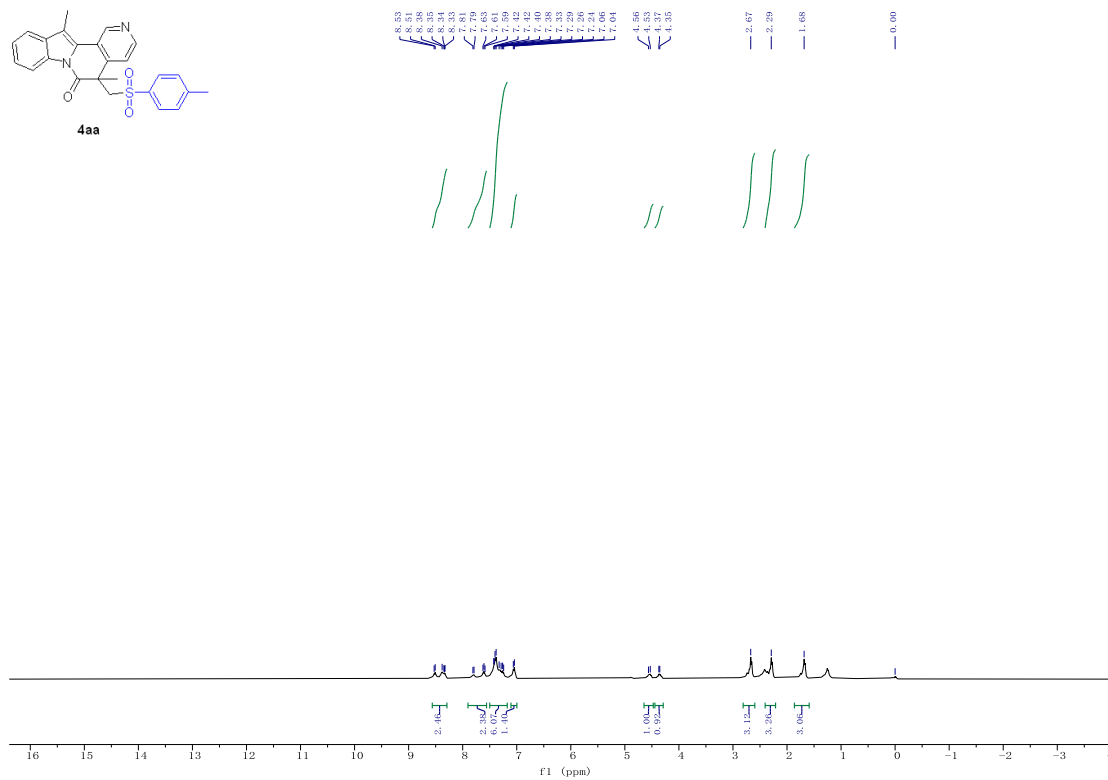



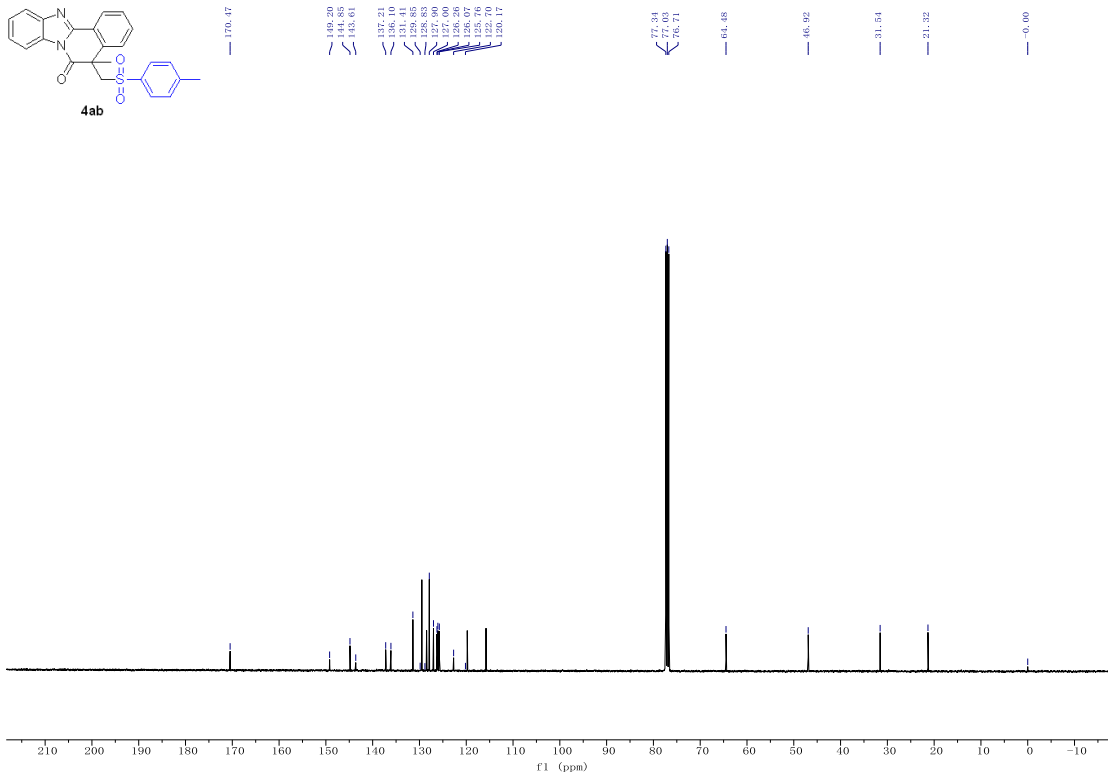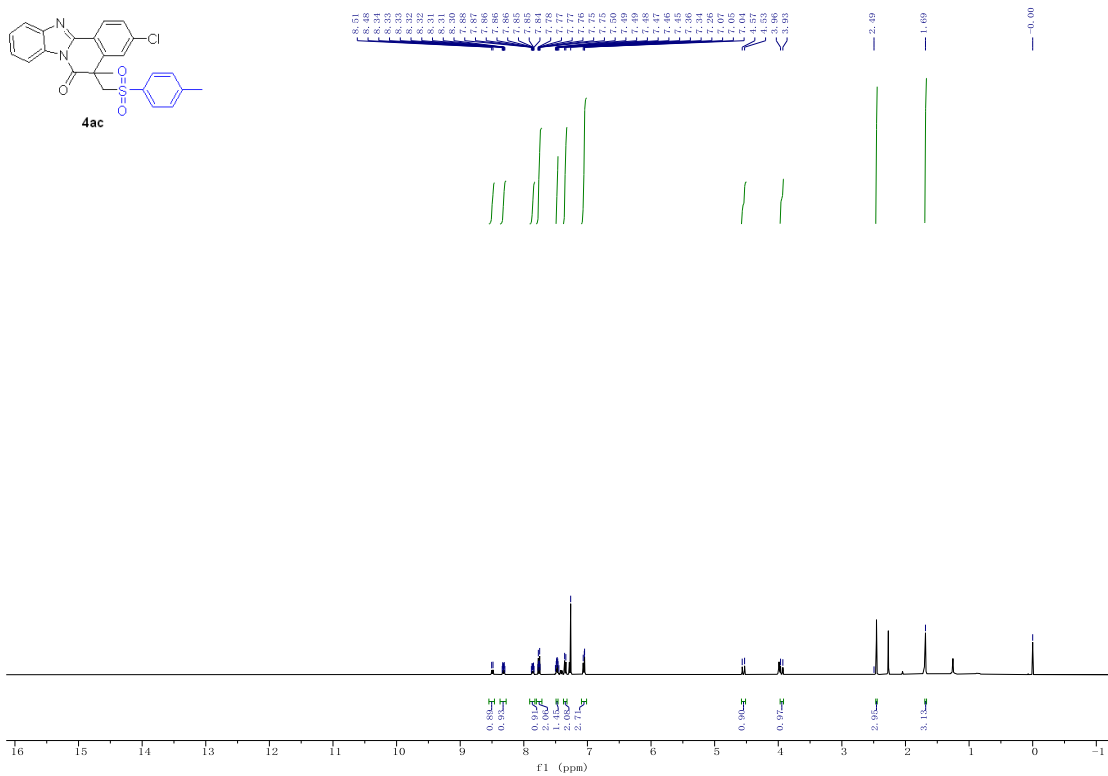



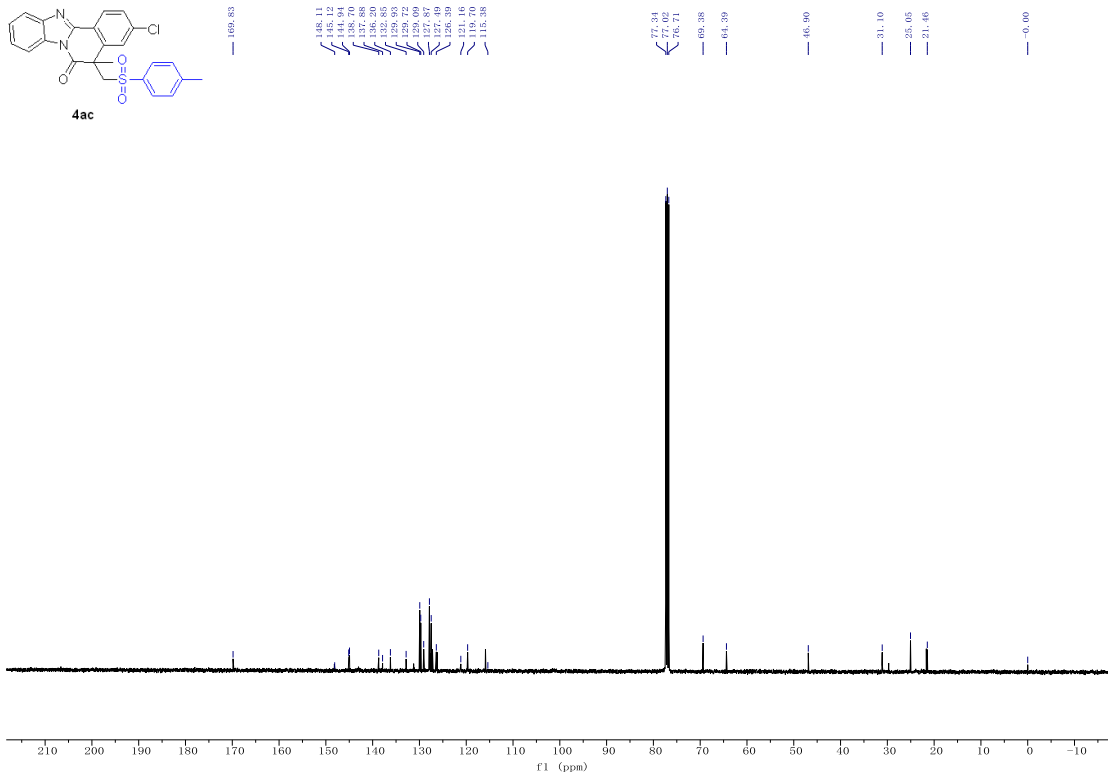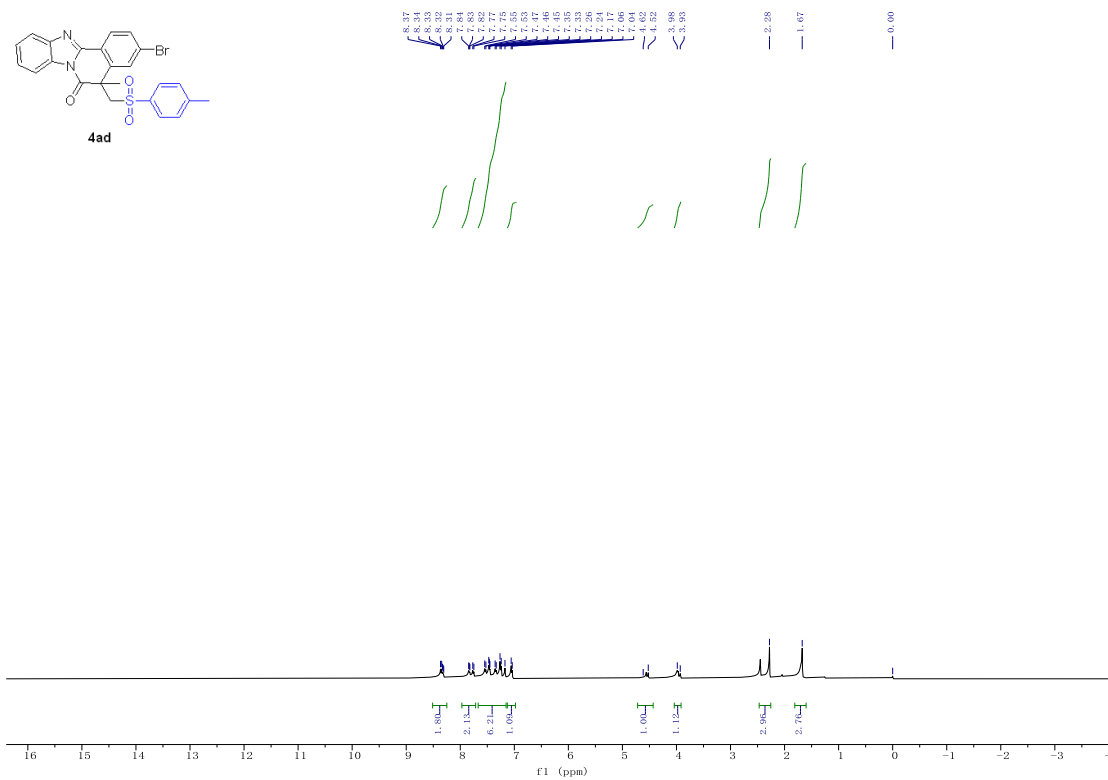

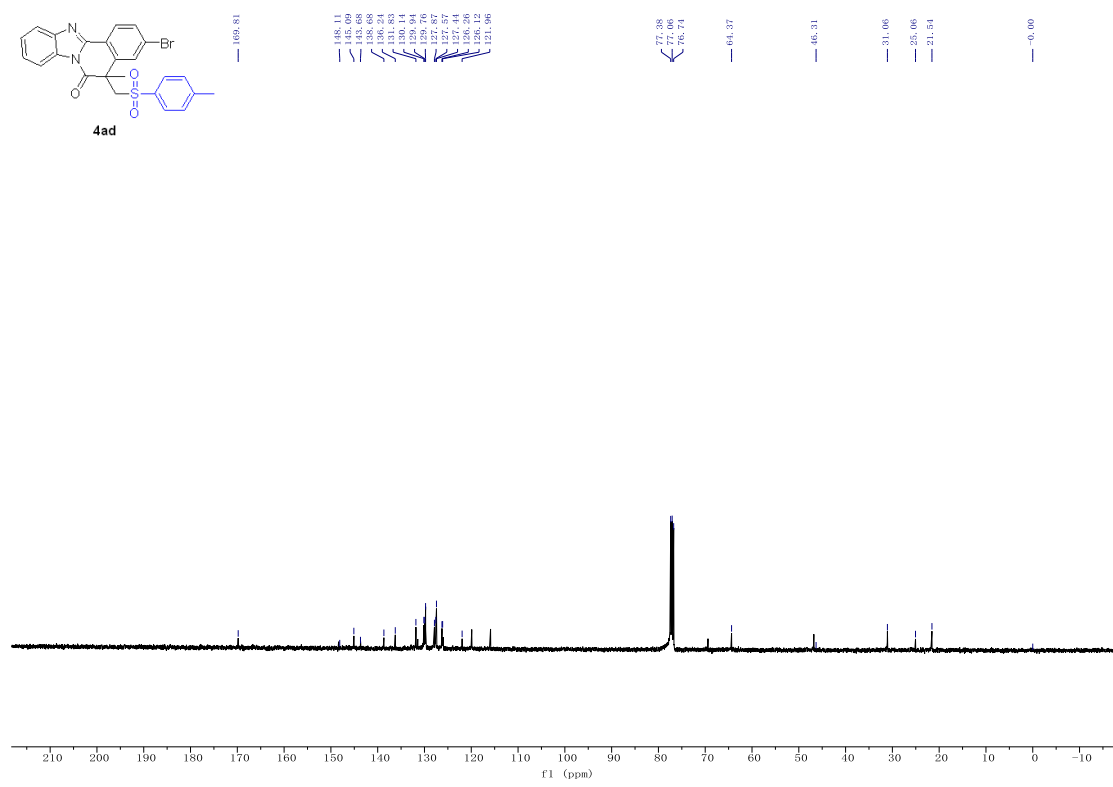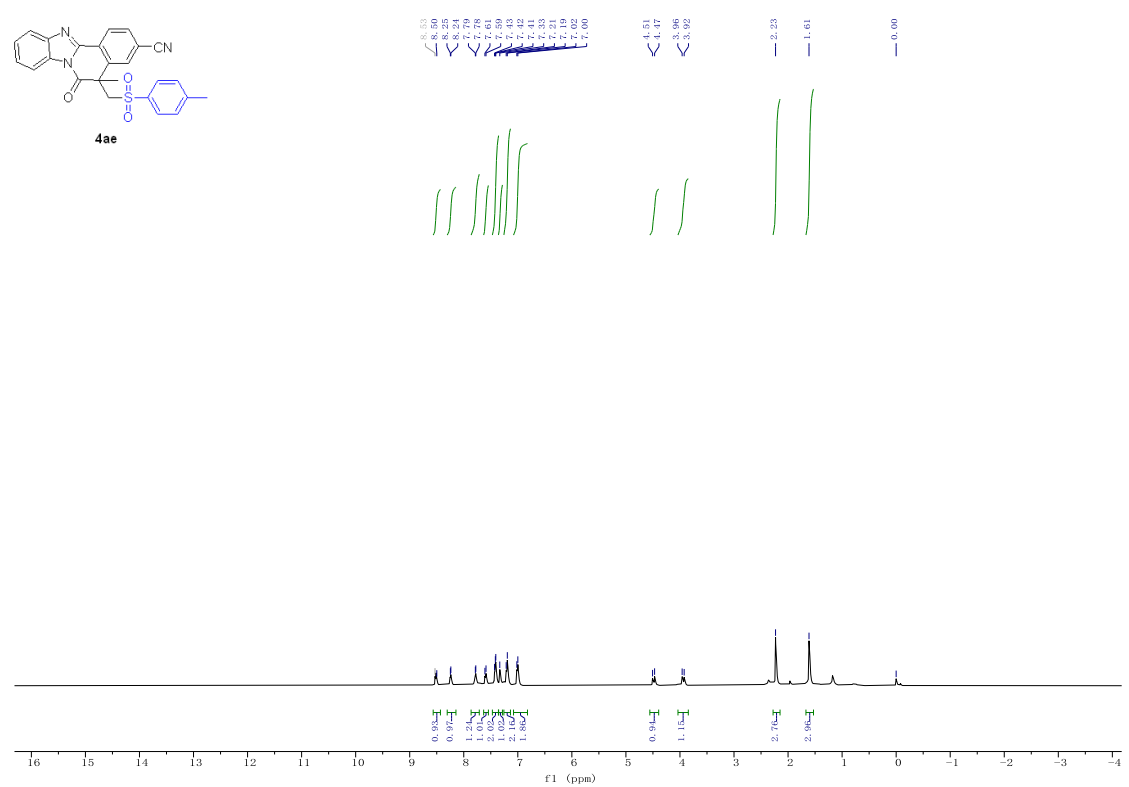

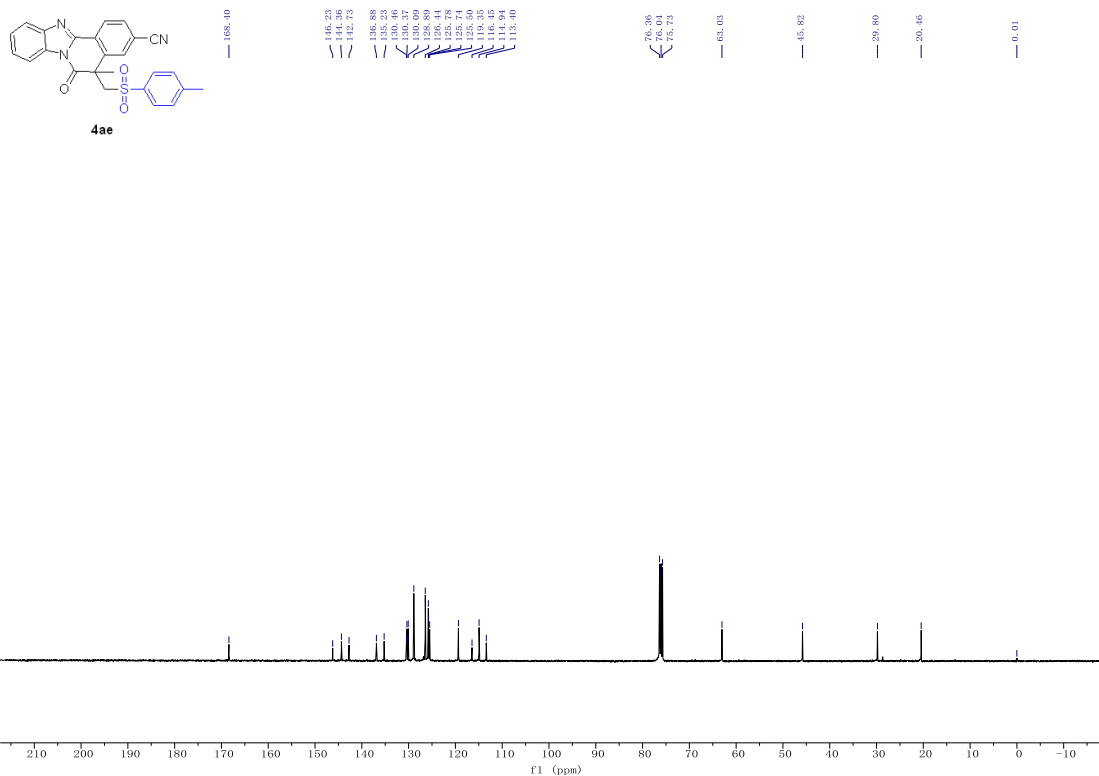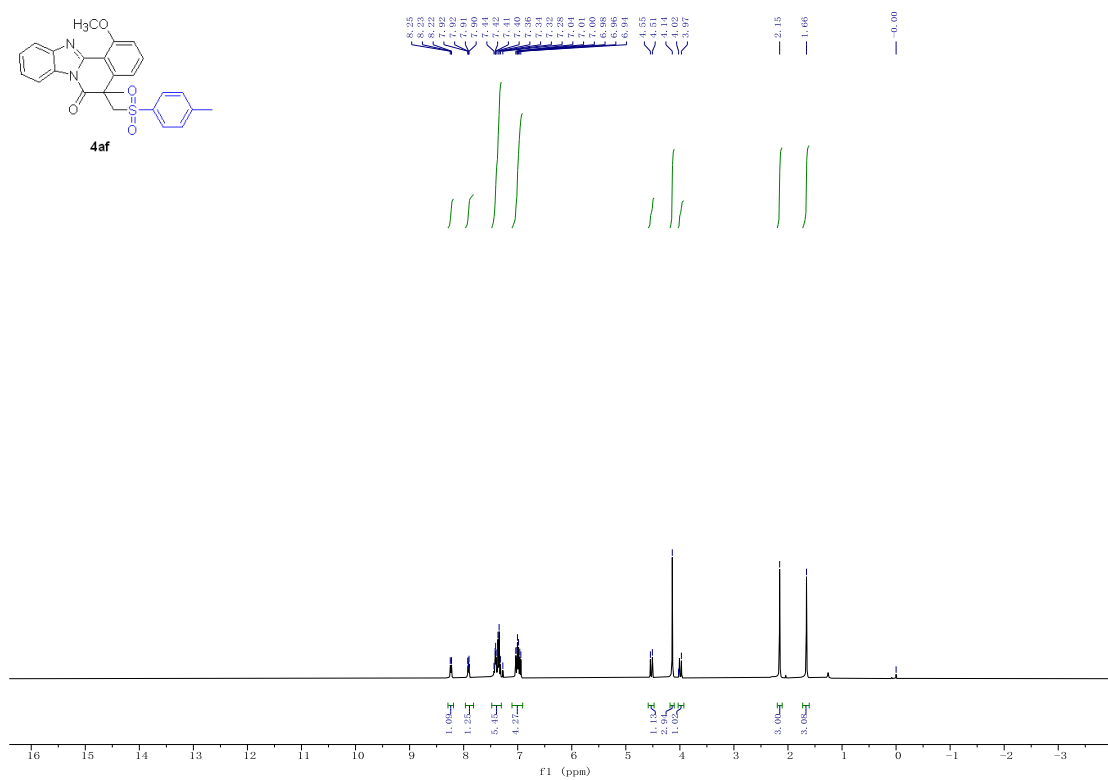





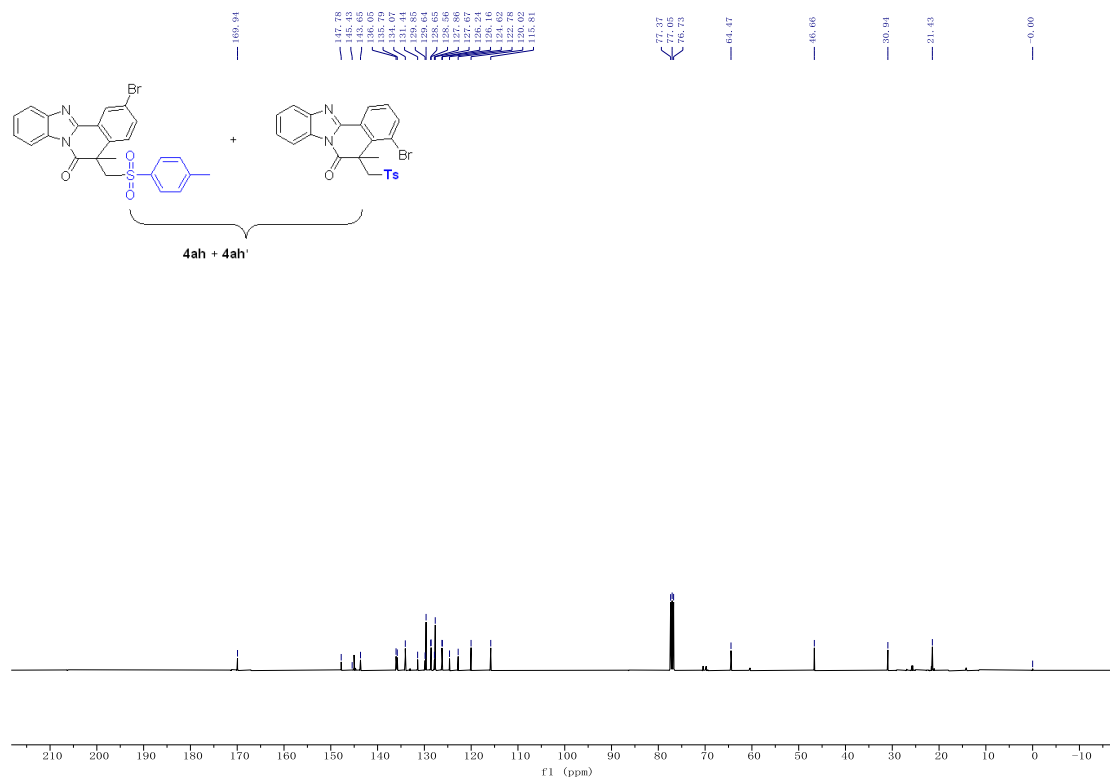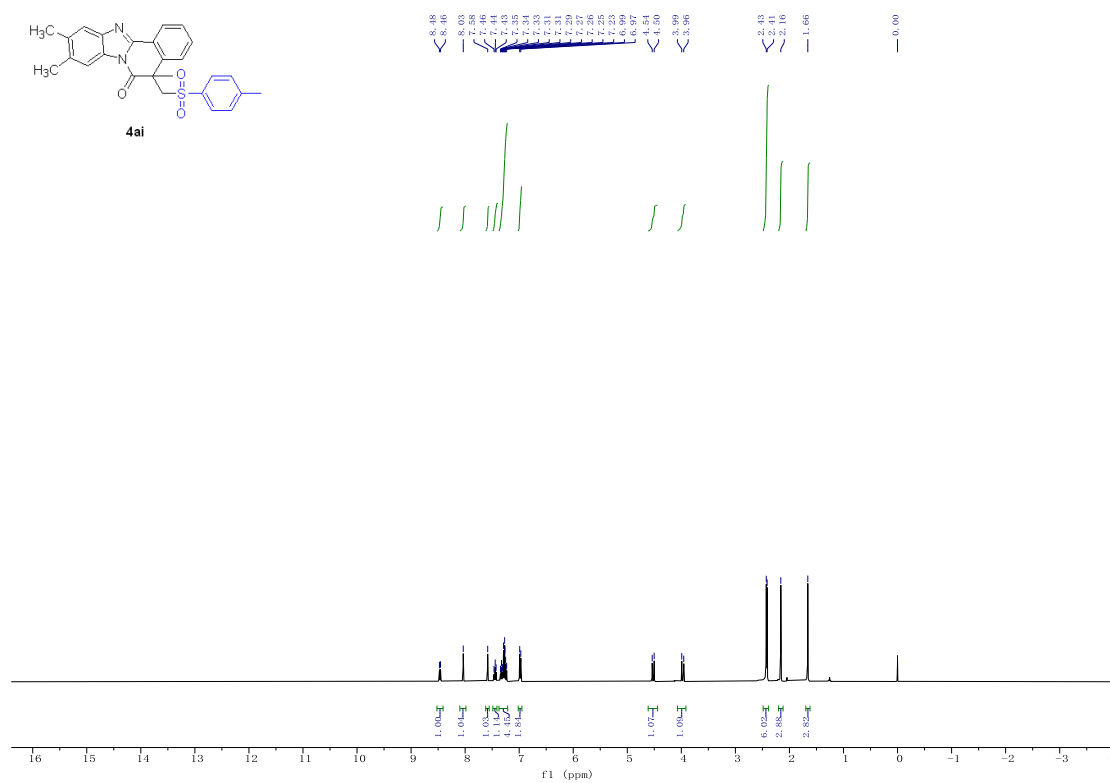

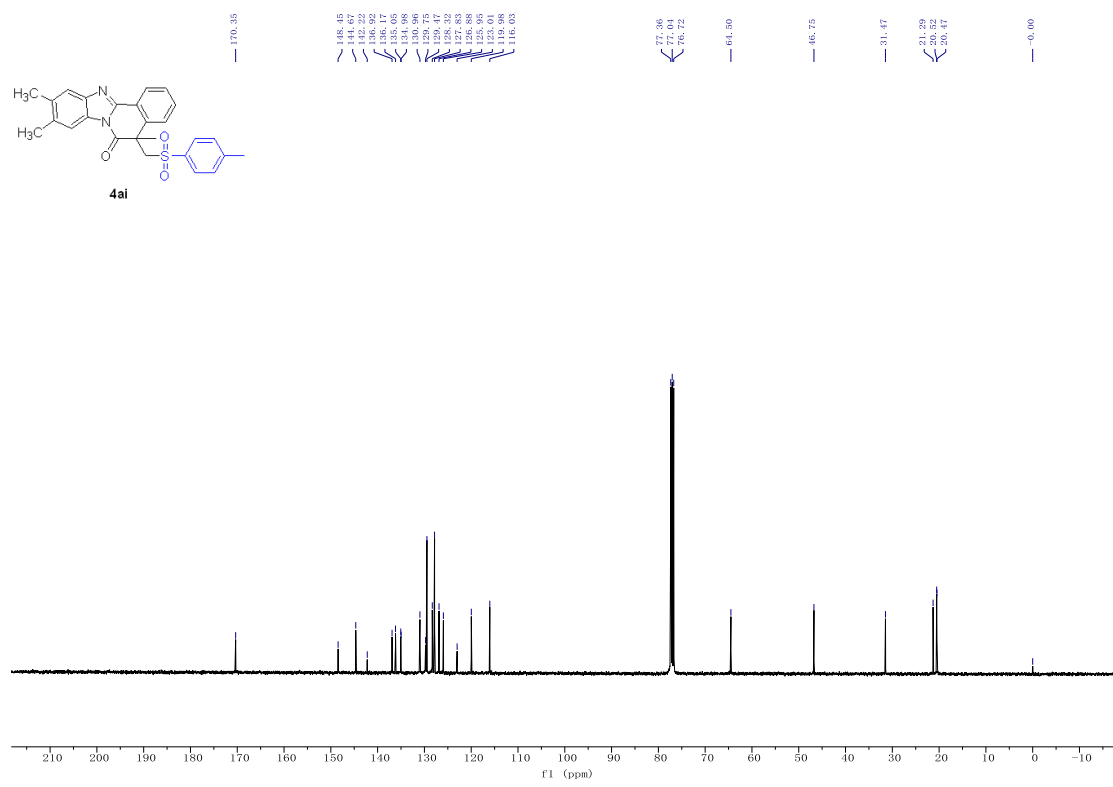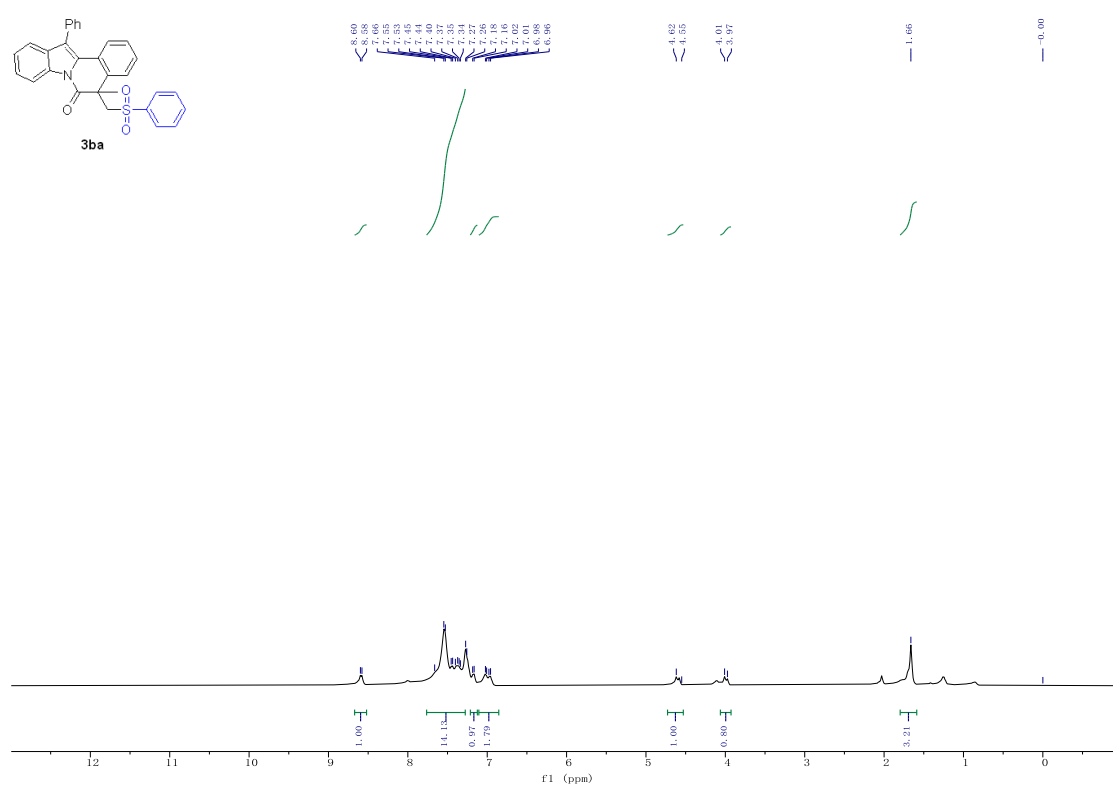





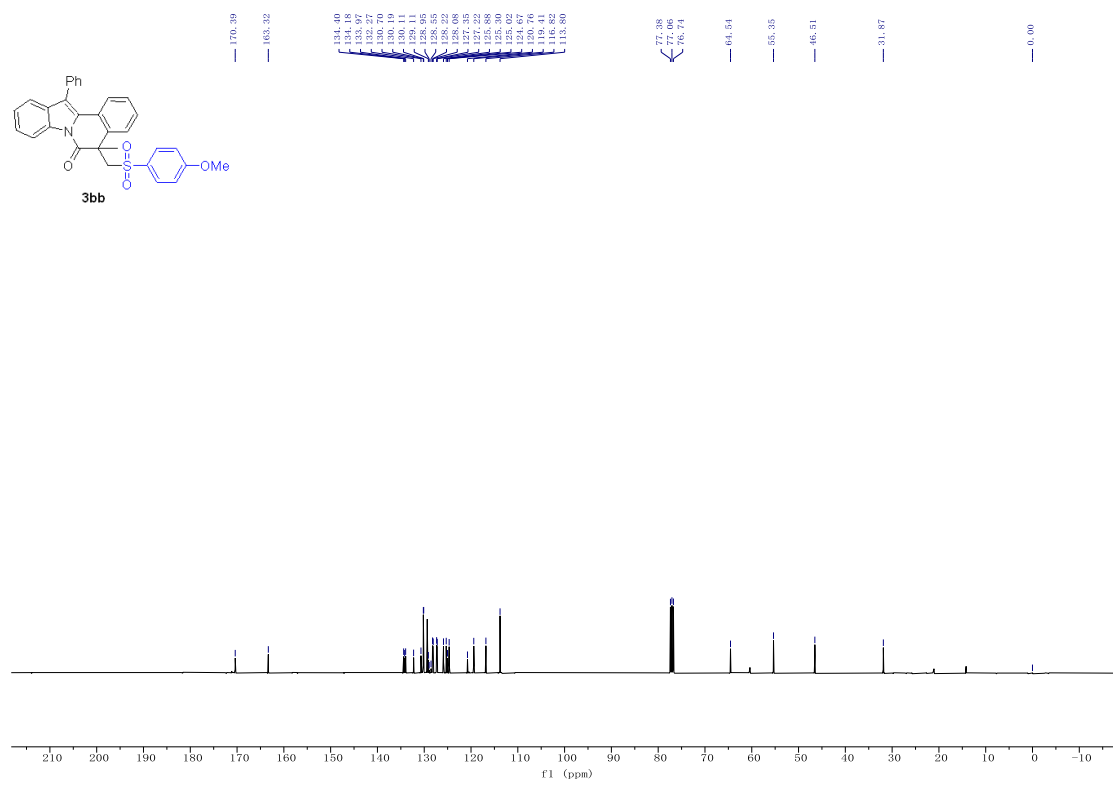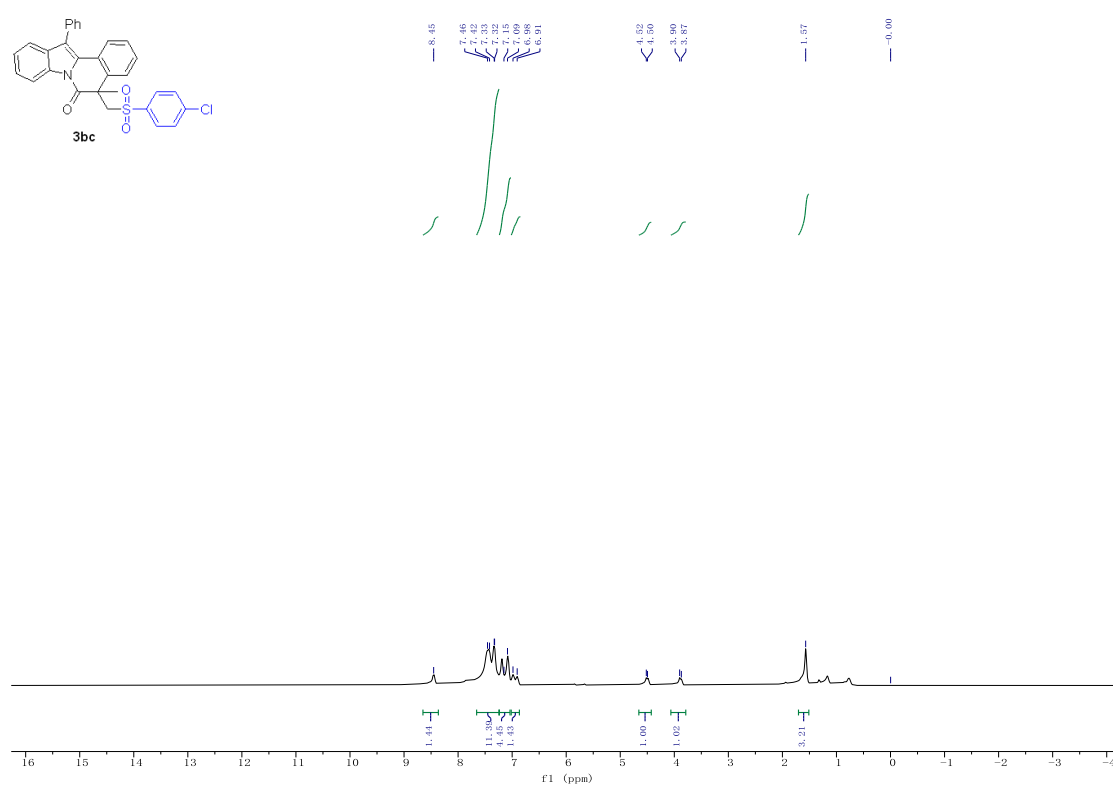



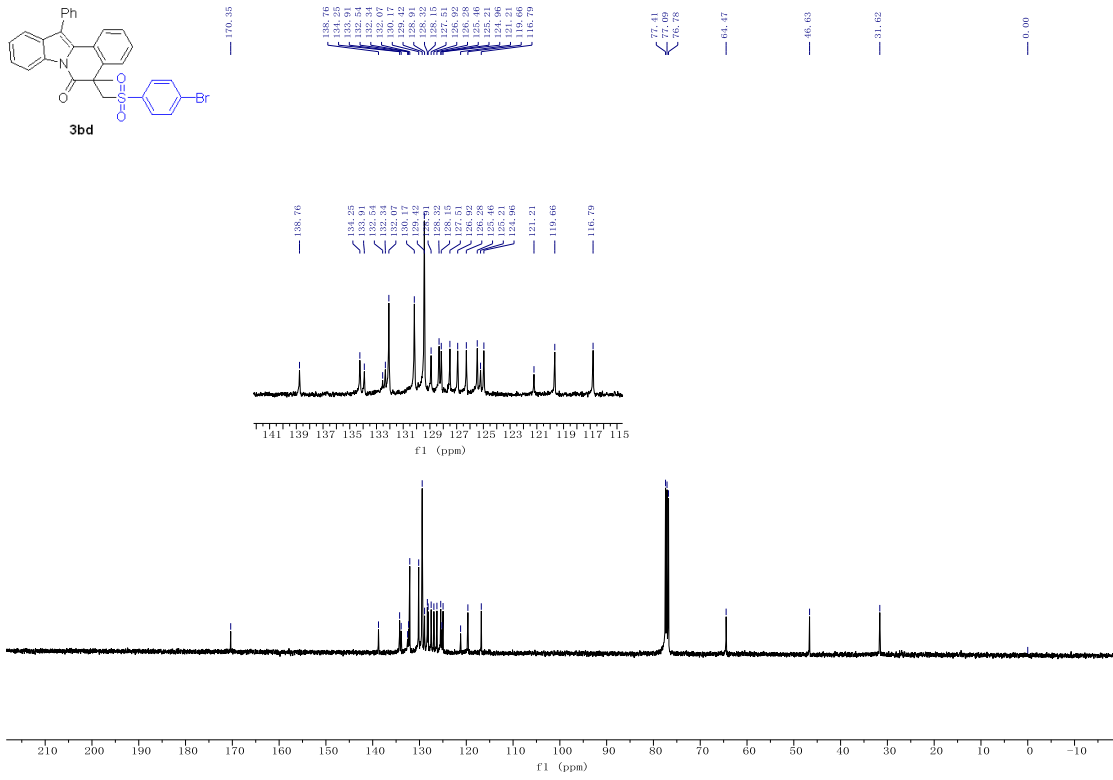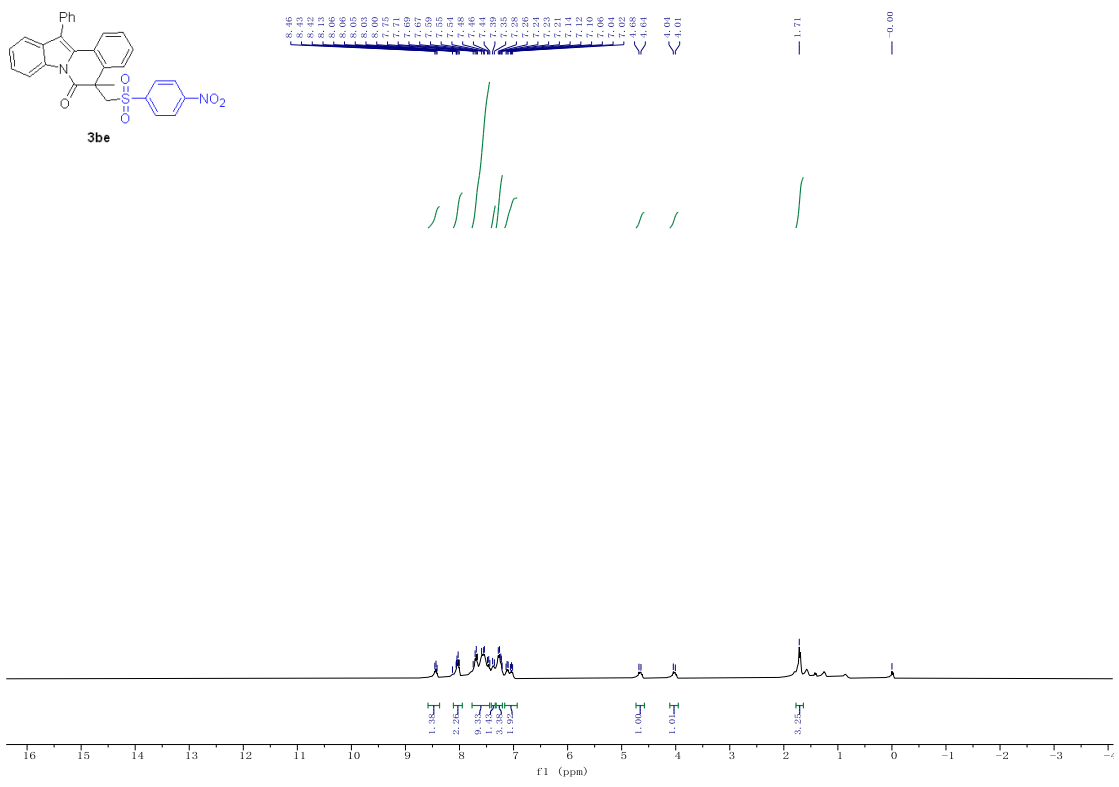

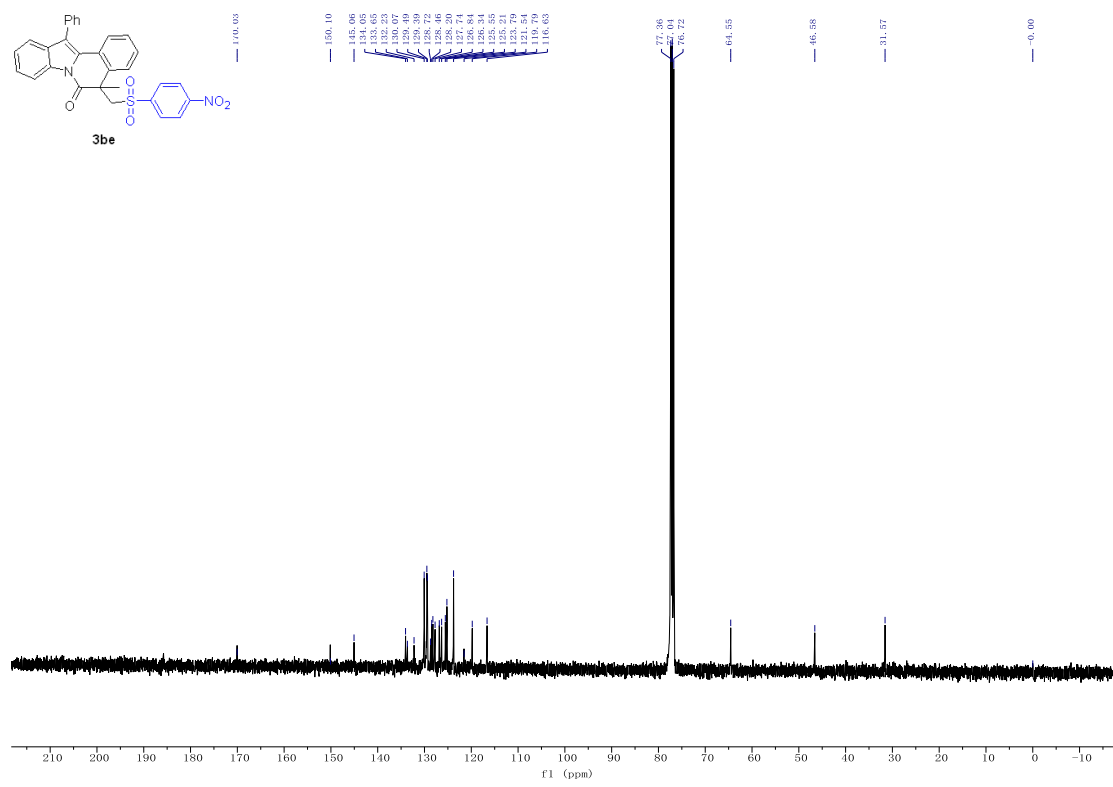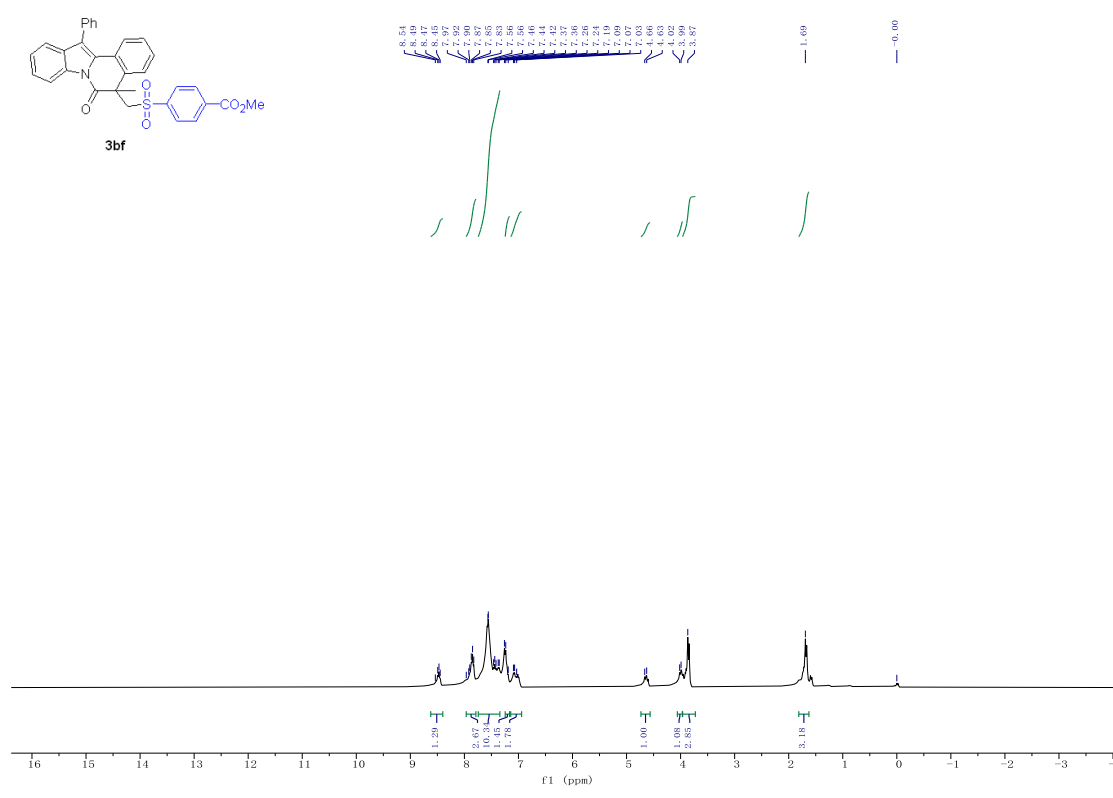

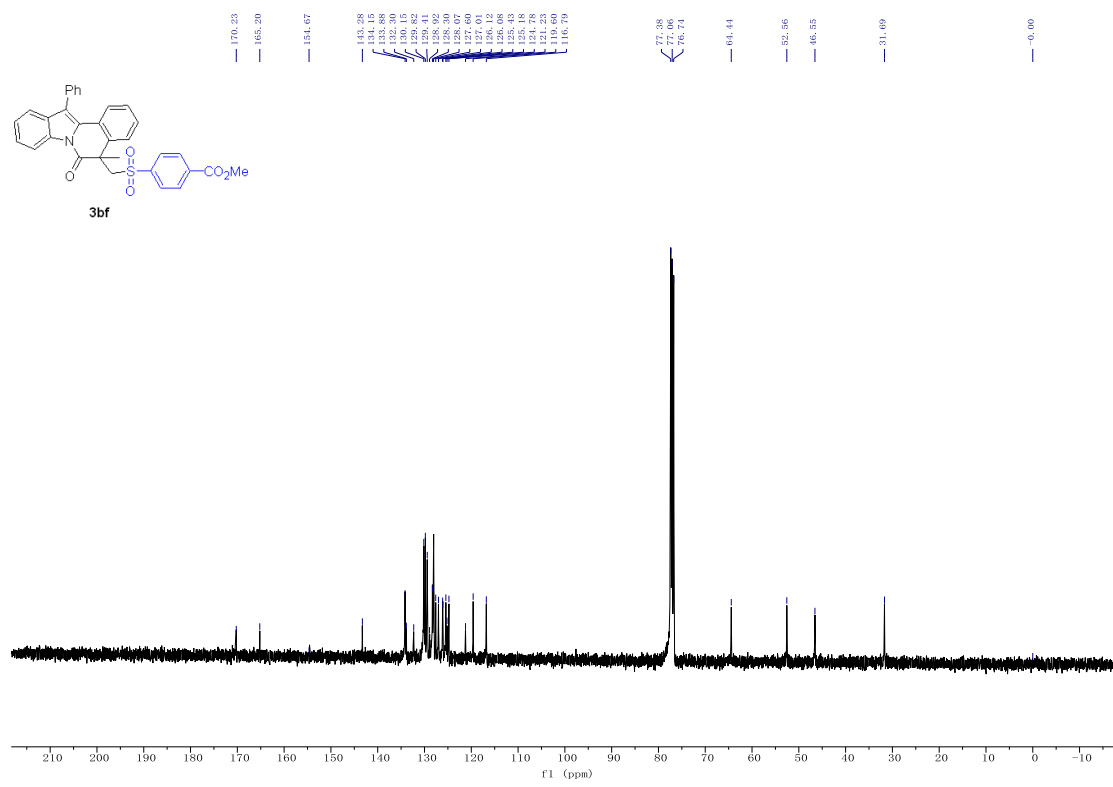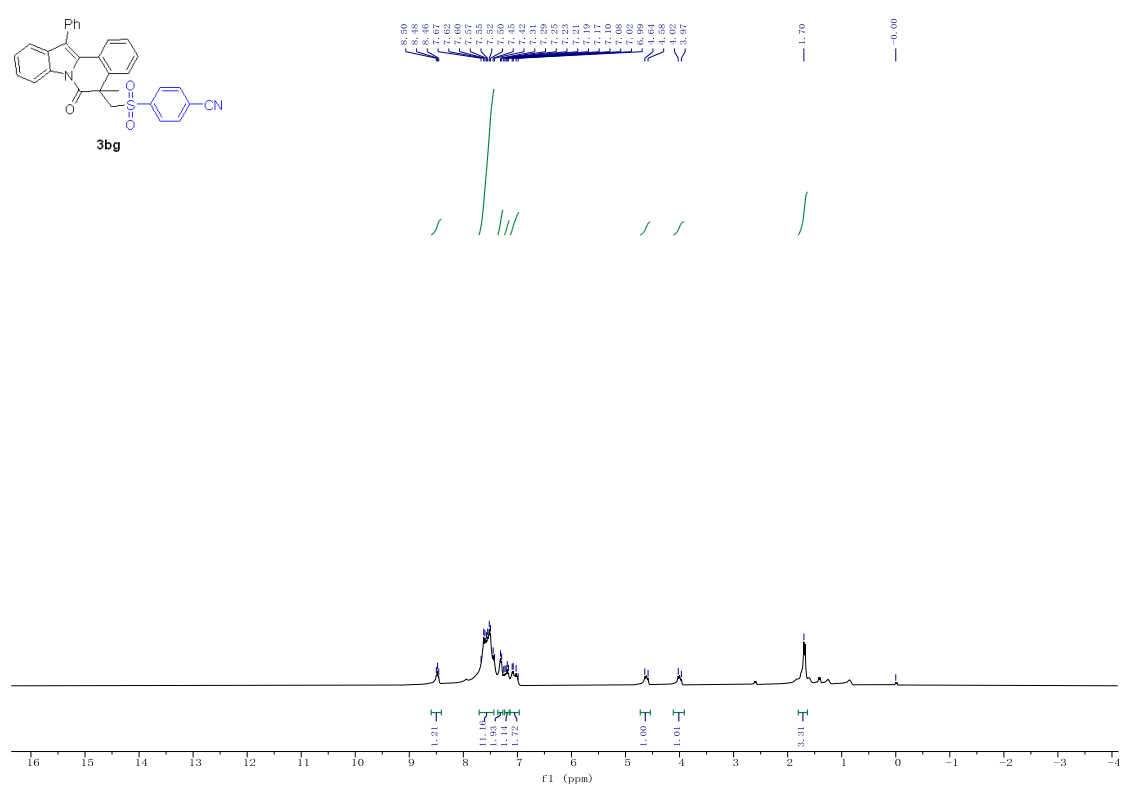

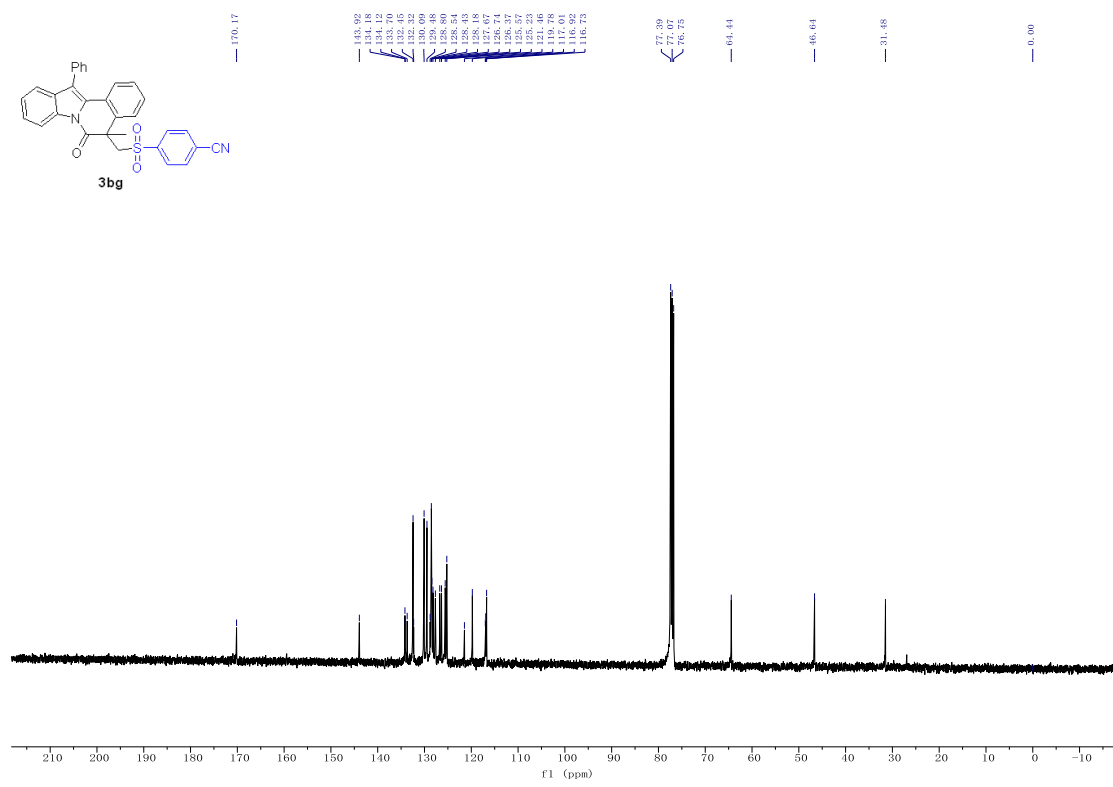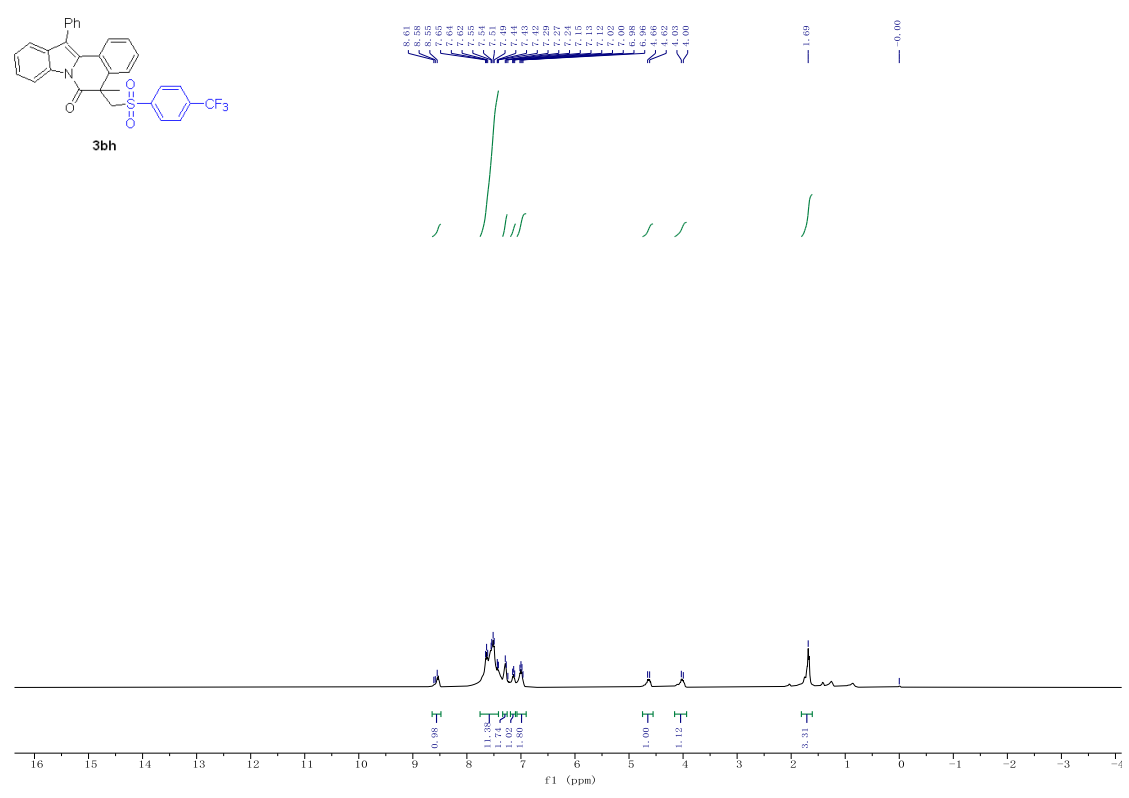



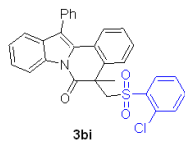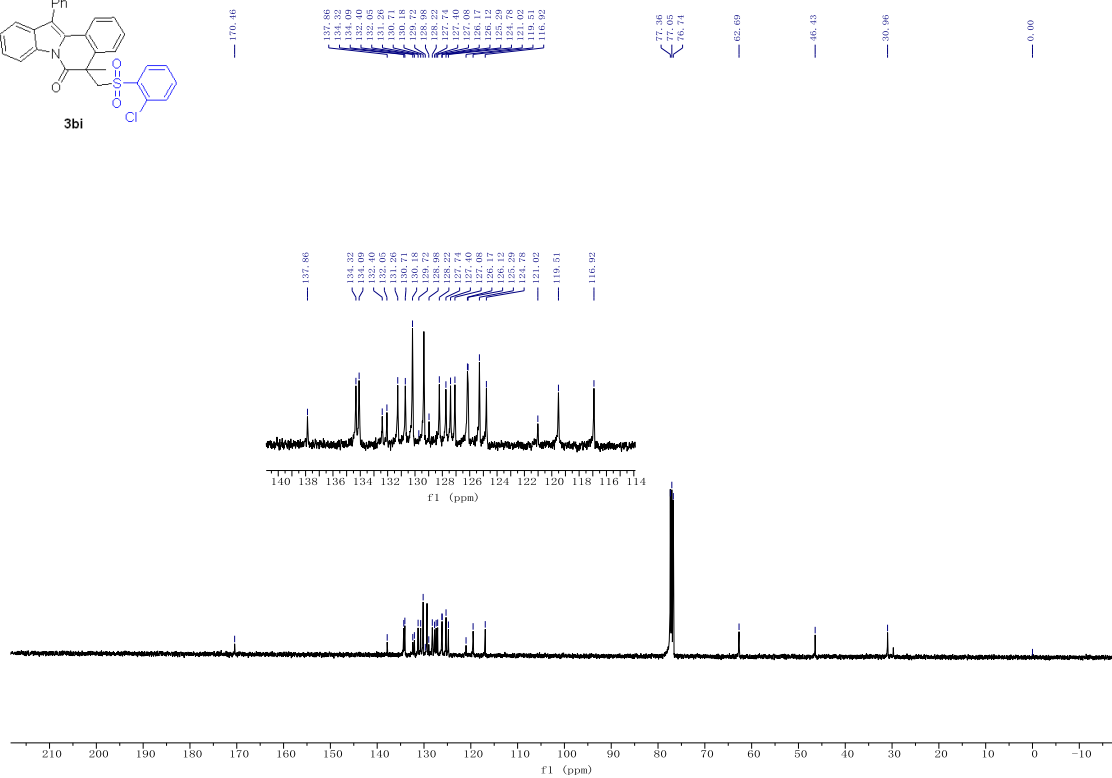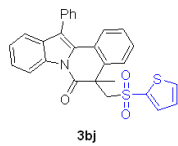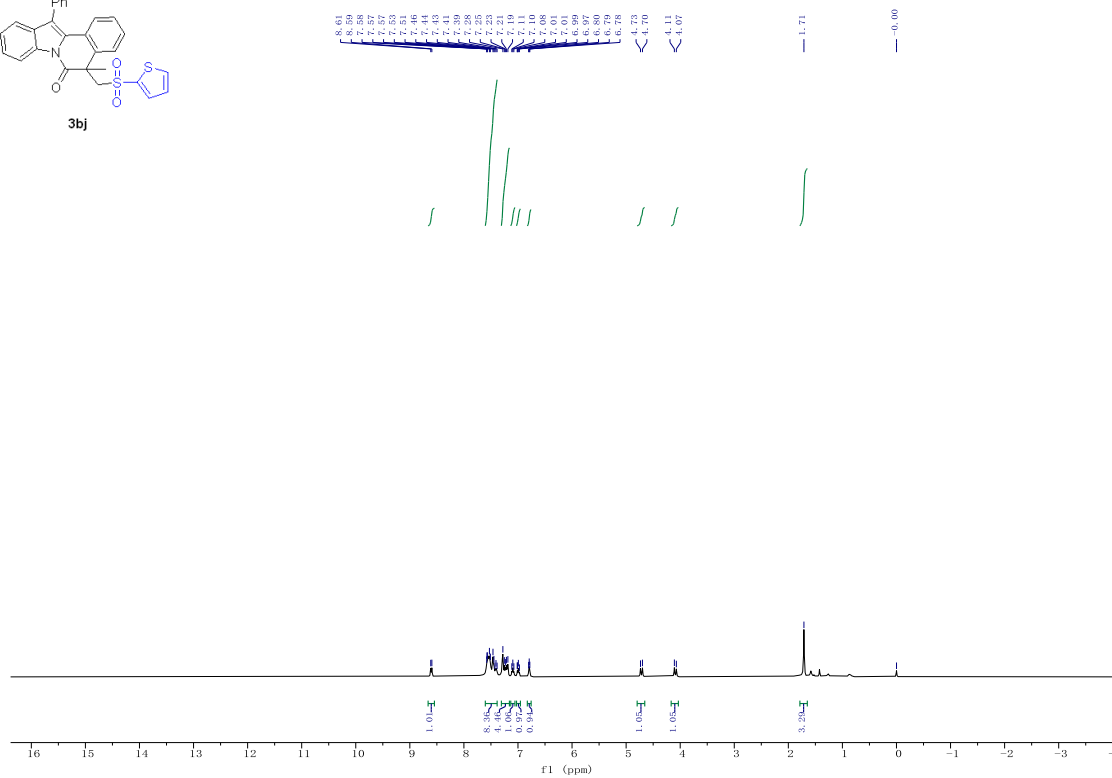



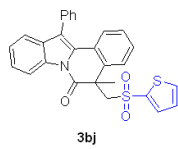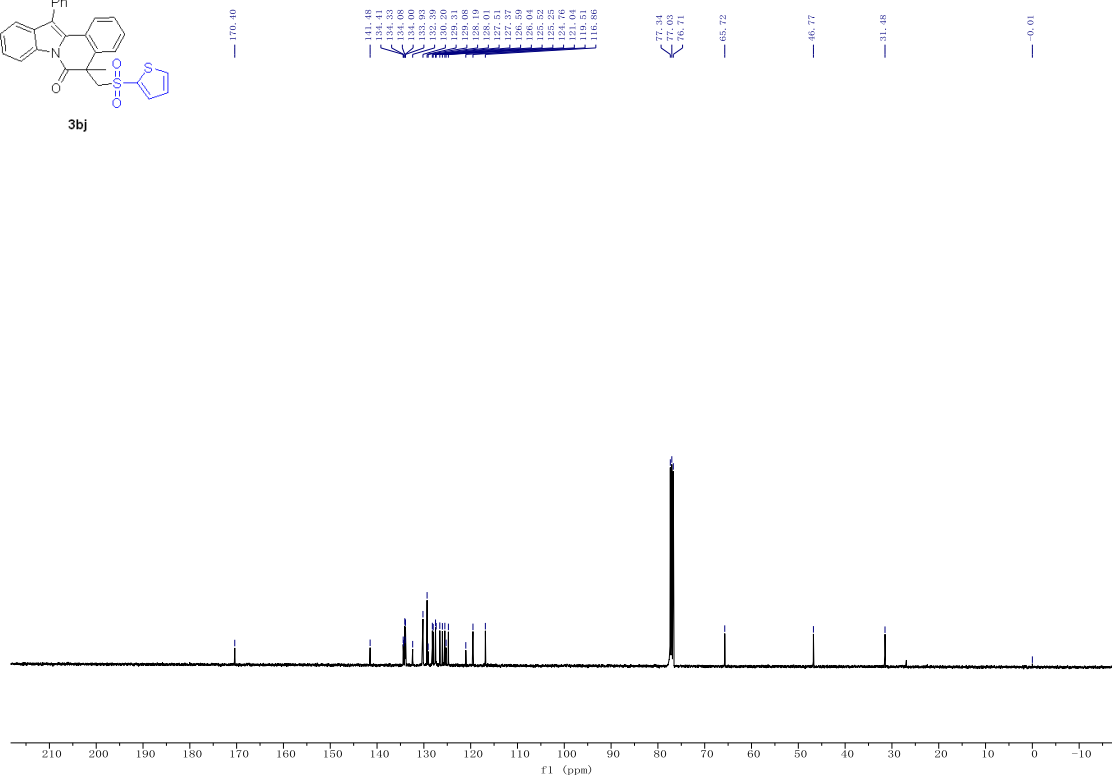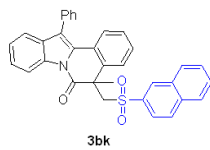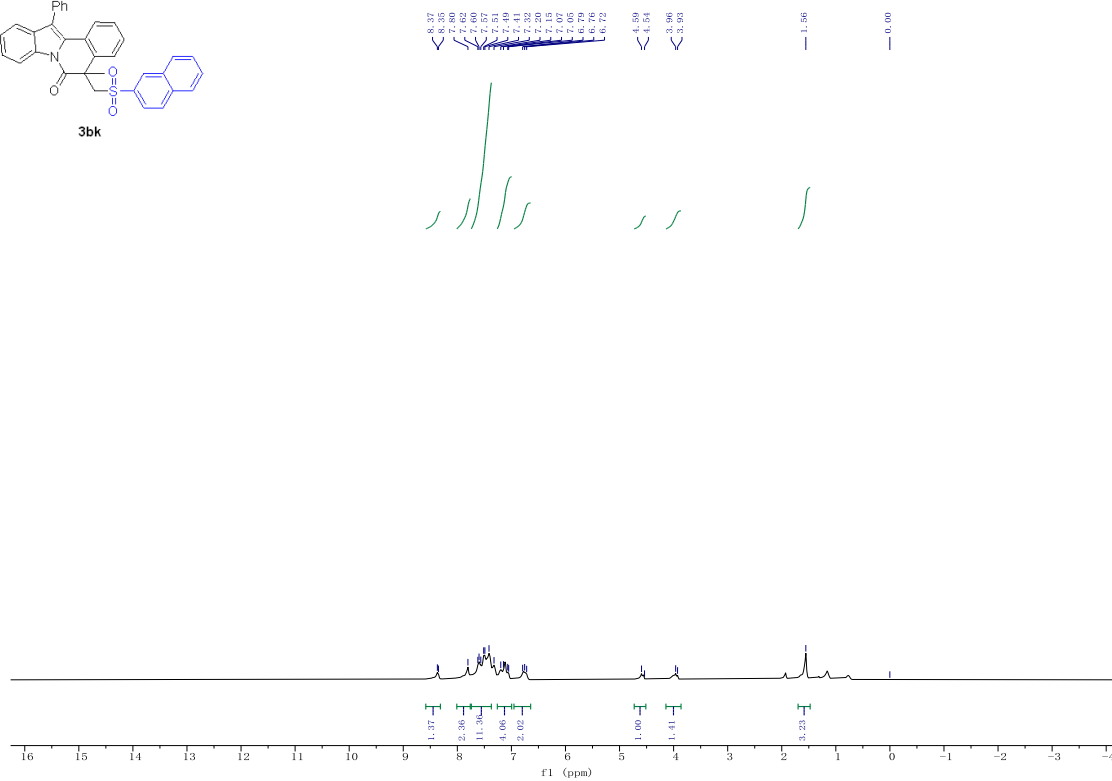

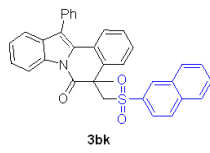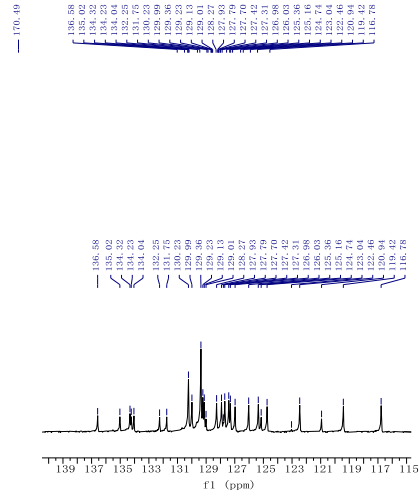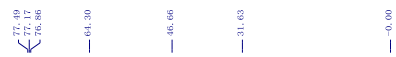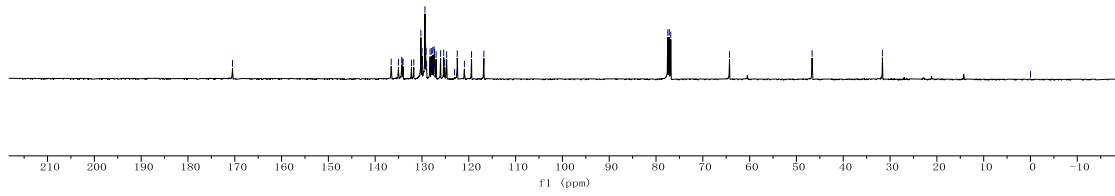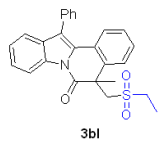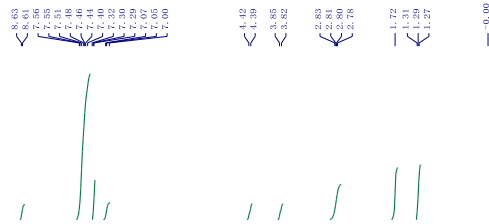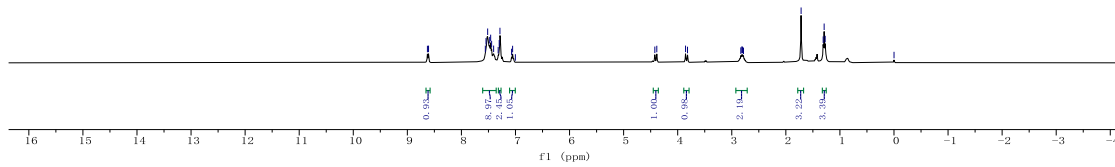

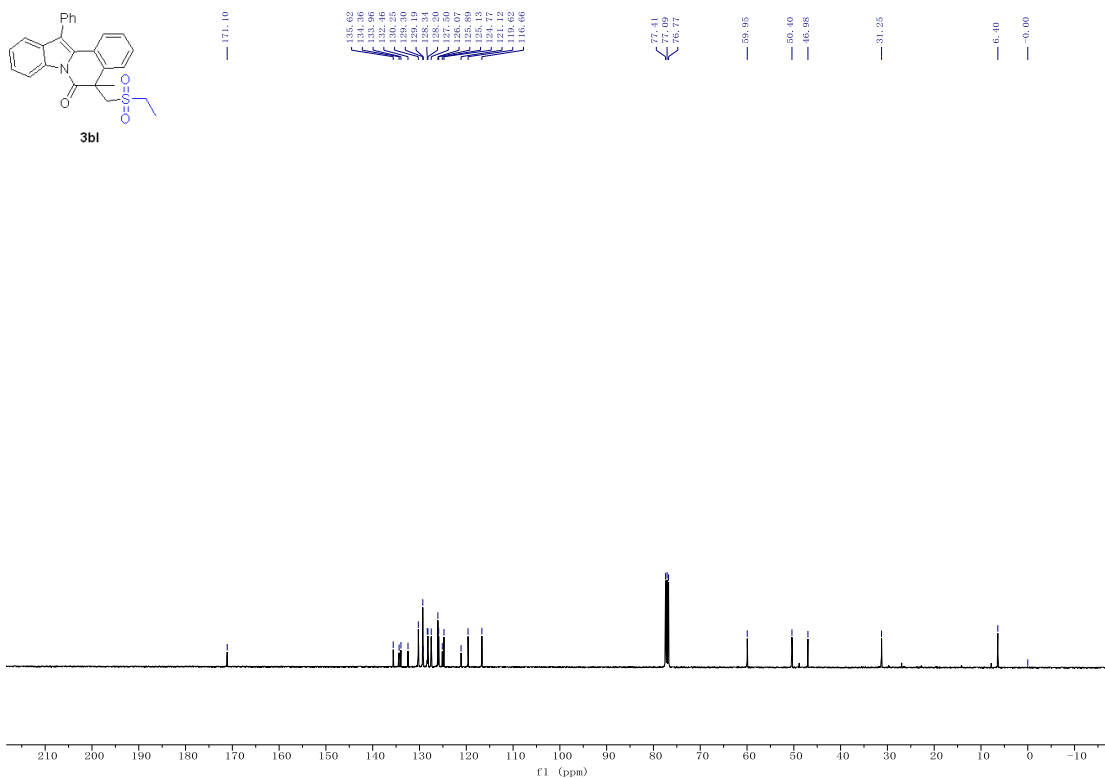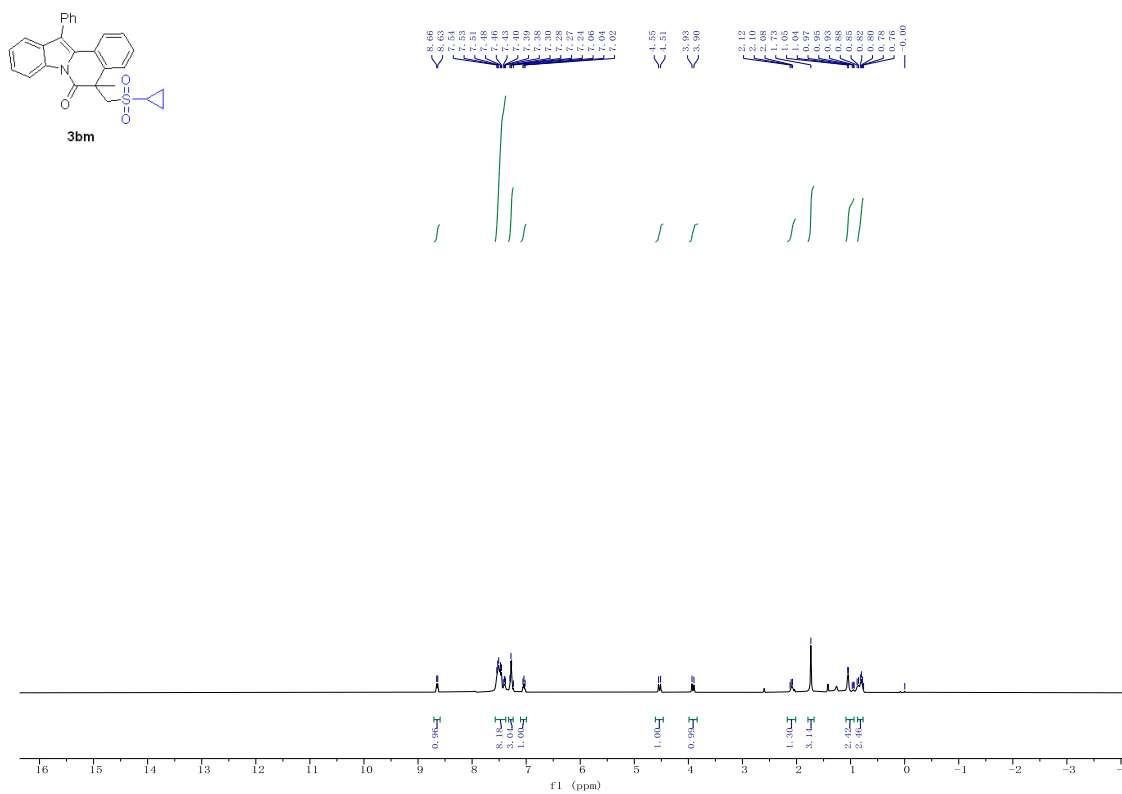

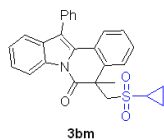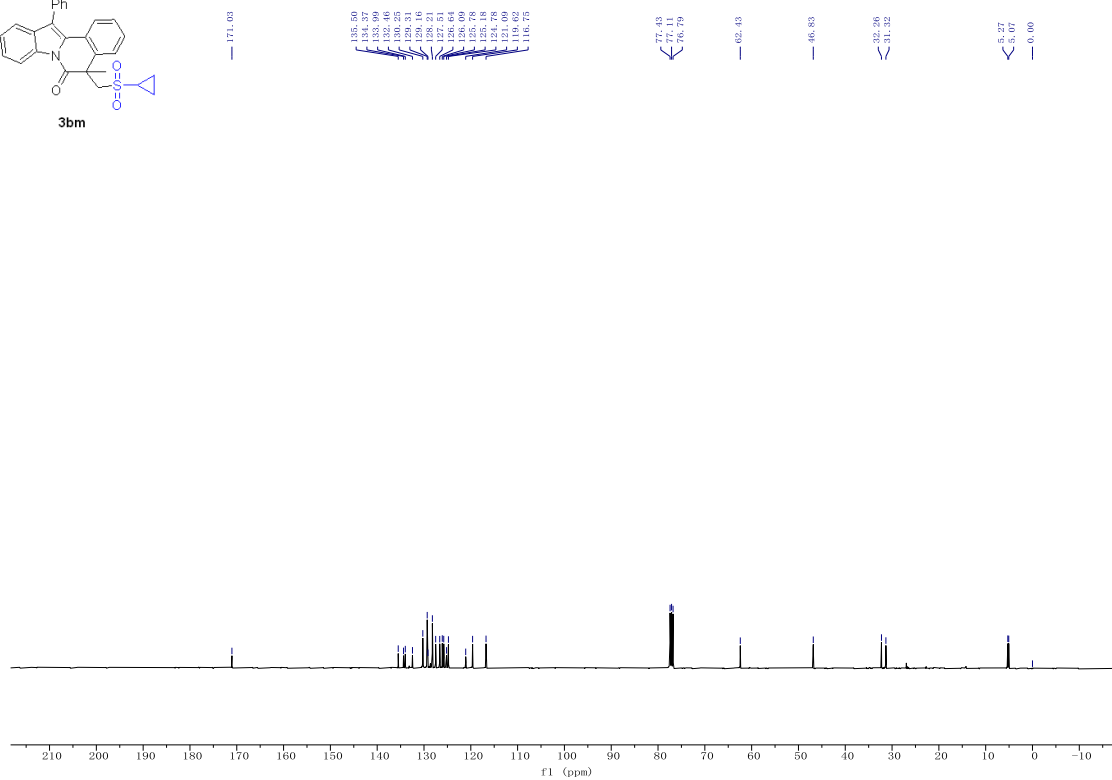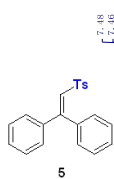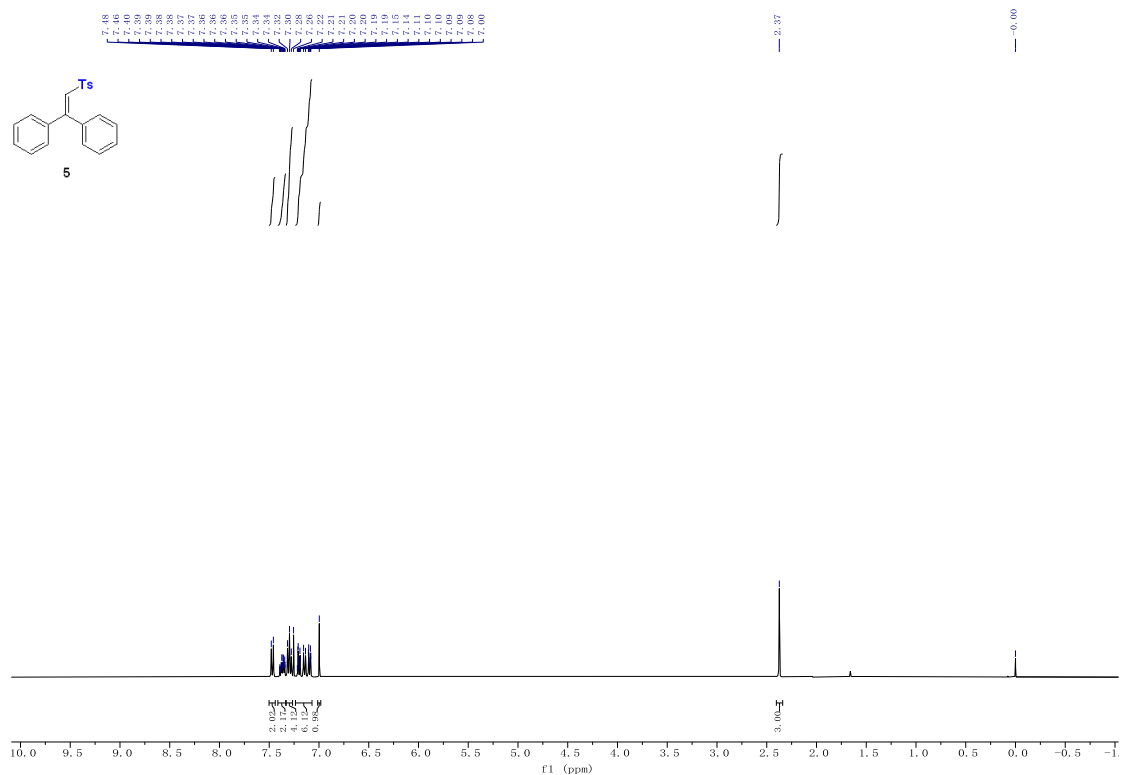

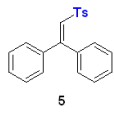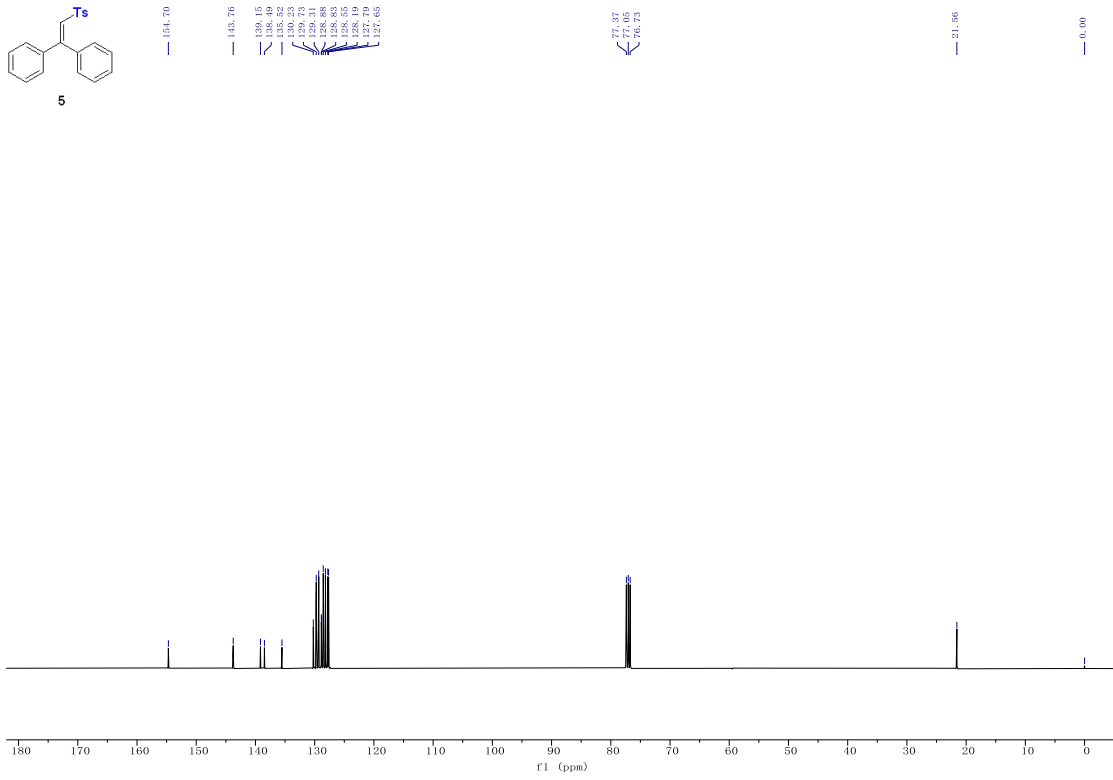

Supplement: d3ob01289a1.pdf [file d3ob01289a1.pdf]
